# Supplementary material for: A metal- and oxidizing-reagent-free anodic para-selective amination of anilines with phenothiazines
Source: Royal Society of Chemistry journal article supplement (doi:10.1039/c9cc01332f), 2019-01-01

## Supporting Information

# Metal- and Oxidizing-Reagent-Free Anodic *para*-Selective Amination of Anilines with Phenothiazines

Yan-Chen Wu<sup>a</sup>, Shuai-Shuai Jiang<sup>a</sup>, Ren-Jie Song,<sup>\*a</sup> and Jin-Heng Li<sup>\*,a,b</sup>

<sup>a</sup> Key Laboratory of Jiangxi Province for Persistent Pollutants Control and Resources Recycle, Nanchang Hangkong University, Nanchang 330063, China

<sup>b</sup> State Key Laboratory of Chemo/Biosensing and Chemometrics, Hunan University, Changsha 410082, China

E-mail: [srj0731@hnu.edu.cn](mailto:srj0731@hnu.edu.cn) and [jhli@hnu.edu.cn](mailto:jhli@hnu.edu.cn)

### List of Contents

|                                                                 |                |
|-----------------------------------------------------------------|----------------|
| <b>(A) Typical experimental procedure</b>                       | <b>S2-S3</b>   |
| <b>(B) Analytical data</b>                                      | <b>S4-S20</b>  |
| <b>(C) Spectra</b>                                              | <b>S21-S59</b> |
| <b>(D) The X-ray single-crystal diffraction analysis of 3aa</b> | <b>S60</b>     |

## (A) Typical experimental procedure

To an oven-dried undivided three-necked bottle (10mL) were added substrates **1a** aniline (0.3 mmol), phenothiazine (1.2 equiv),  $n\text{Bu}_4\text{NPF}_6$  (0.3 mmol) and  $\text{CH}_3\text{CN}$  (10 mL). The bottle was equipped graphite rod ( $\phi$  6 mm, about 18 mm immersion depth in solution) as the anode and pt plate (10 mm $\times$ 10 mm $\times$ 1 mm) as the cathode. The reaction mixture was stirred and electrolyzed at a constant current of 10 mA under room temperature for 3 h (Figure S1). and stopped until complete consumption of aniline (monitored by TLC). After the reaction was finished, the reaction mixture was concentrated in vacuum, and the resulting residue was purified by silica gel column chromatography (hexane/ethyl acetate) to afford the desired product **3aa**.

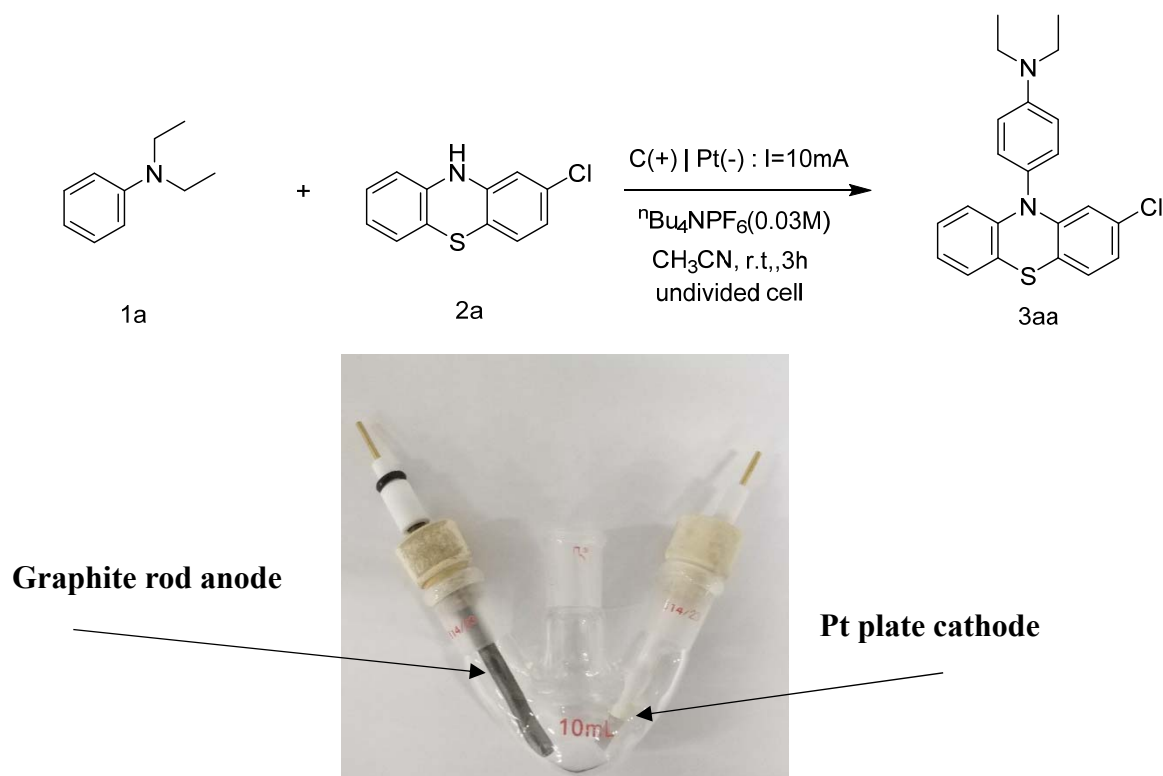

**Figure S1.** Undivided cell for current controlled electrolysis

**Procedure for cyclic voltammetry (CV):** Cyclic voltammetry was performed in a three-electrode cell connected to a schlenk line under nitrogen at room temperature. The working electrode was a steady glassy carbon disk electrode while the counter electrode was a platinum plate. The reference was an Ag/AgCl electrode submerged in saturated aqueous KCl solution, and separated from reaction by a salt bridge. 10 mL solvent containing 0.3 M  $n\text{Bu}_4\text{NPF}_6$  were poured into the electrochemical cell in cyclic voltammetry experiments. The CV of all substrates were measured at the concentration of 0.01M. The scan rate was 0.10 V/s, ranging from 0 V to 2.0 V.

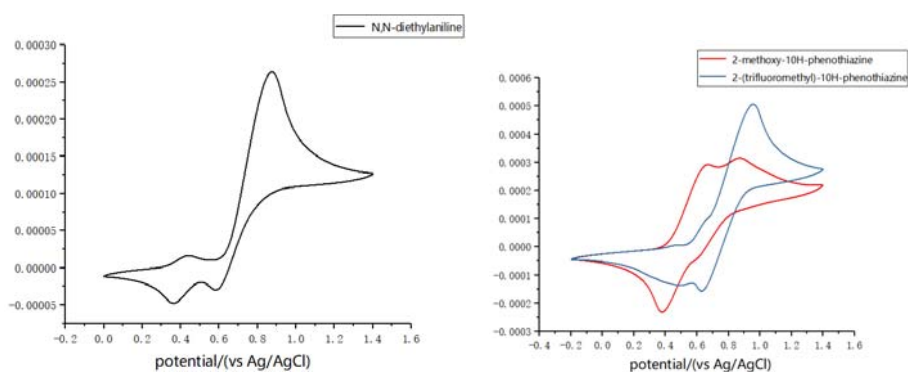

**Figure S2.** Study of the oxidation potential during electrolysis

## (B) Analytical data

### 4-(2-Chloro-10*H*-phenothiazin-10-yl)-*N,N*-diethylaniline (3aa):

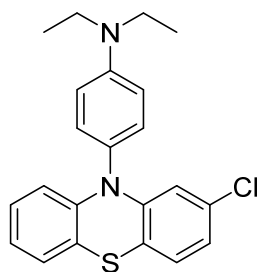

White solid; mp 138.8-142.4 °C (uncorrected); <sup>1</sup>H NMR (500 MHz, CDCl<sub>3</sub>) δ: 7.14-7.12 (m, 2H), 6.95-6.93 (m, 1H), 6.86-6.77 (m, 5H), 6.73-6.71 (m, 1H), 6.28-6.26 (m, 2H), 3.45-3.41 (m, 4H), 1.24 (t, *J* = 7.5 Hz, 6H); <sup>13</sup>C NMR (125MHz, CDCl<sub>3</sub>) δ: 147.5, 146.2, 144.5, 132.6, 131.4, 127.1, 127.0, 126.9, 126.4, 122.4, 121.6, 119.1, 117.9, 116.0, 115.6, 112.9, 44.4, 12.6; LRMS (EI, 70eV) *m/z* (%): 380 (M<sup>+</sup>, 100), 335 (36), 273 (13), 182 (12); HRMS *m/z* (ESI) calcd for C<sub>22</sub>H<sub>21</sub>ClN<sub>2</sub>S ([M+H]<sup>+</sup>) 381.1187, found 381.1196.

### 4-(2-Chloro-10*H*-phenothiazin-10-yl)-*N,N*-dimethylaniline (3ba):

Yellow solid; mp 146.4-48.1 °C (uncorrected); <sup>1</sup>H NMR (500 MHz, CDCl<sub>3</sub>) δ: 7.19-

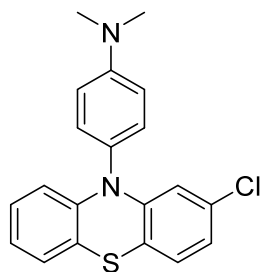

7.17 (m, 2H), 6.96-6.94 (m, 1H), 6.89-6.87 (m, 2H), 6.86-6.84 (m, 1H), 6.83-6.77(m, 2H), 6.74-6.72 (m, 1H), 6.24-6.22 (m, 2H), 3.06 (s, 6H); <sup>13</sup>C NMR (125 MHz, CDCl<sub>3</sub>) δ: 150.1, 146.2, 144.4, 132.6, 131.3, 128.3, 127.0, 126.9, 126.5, 122.4, 121.7, 119.1, 117.9, 116.0, 115.6, 113.8, 40.5.; LRMS (EI, 70eV) *m/z* (%): 352 (M<sup>+</sup>, 100), 320 (12), 158 (12), 121 (18); HRMS *m/z* (ESI) calcd for C<sub>20</sub>H<sub>17</sub>ClN<sub>2</sub>S ([M+H]<sup>+</sup>) 353.0874, found 353.0881.

**4-(2-Chloro-10H-phenothiazin-10-yl)-N,N-dipropylaniline (3ca):**

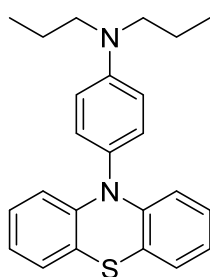

Yellow solid; mp 100.9-102.4 °C (uncorrected); <sup>1</sup>H NMR (500 MHz, CDCl<sub>3</sub>) δ: 7.12-7.10 (m, 2H), 6.95-6.93 (m, 1H), 6.85-6.81 (m, 2H), 6.78-6.75 (m, 3H), 6.73-6.71 (m, 1H), 6.28-6.25 (m, 2H), 3.29 (t, *J* = 7.5 Hz, 4H), 1.72-1.65 (m, 4H), 0.98 (t, *J* = 7.5 Hz, 6H); <sup>13</sup>C NMR (125MHz, CDCl<sub>3</sub>) δ : 148.0, 146.3, 144.5, 132.6, 131.3, 127.0, 126.9, 126.4, 122.4, 121.6, 119.1, 117.9, 116.1, 115.7, 112.9, 53.0, 20.4, 11.5. ; LRMS (EI, 70eV) *m/z* (%): 408 (M<sup>+</sup>, 81), 379 (100), 351 (14), 336 (13); HRMS *m/z* (ESI) calcd for C<sub>24</sub>H<sub>25</sub>ClN<sub>2</sub>S ([M+H]<sup>+</sup>) 409.1500, found 409.1509.

**4-(2-Chloro-10H-phenothiazin-10-yl)-N,N-dihexylaniline (3da):**

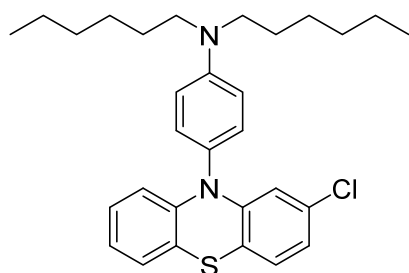

Yellow liquid; <sup>1</sup>H NMR (500 MHz, CDCl<sub>3</sub>) δ: 7.11-7.10 (m, 2H), 6.94-6.93 (m, 1H), 6.85-6.82 (m, 2H), 6.76-6.74 (m, 3H), 6.72-6.70 (m, 1H), 6.28-6.25 (m, 2H), 3.30 (t, *J* = 7.5 Hz, 4H), 1.67-1.62 (m, 4H), 1.37-1.32 (m, 12H), 0.92 (t, *J* = 7.5 Hz, 3H); <sup>13</sup>C NMR (125MHz, CDCl<sub>3</sub>) δ : 147.9, 146.3, 144.5, 132.6, 131.3, 129.1, 127.0, 126.9, 126.4, 122.4, 121.6, 119.1, 117.9, 116.1, 115.6, 112.8, 51.1, 31.7, 27.2, 26.9, 22.7, 14.1; LRMS (EI, 70eV) *m/z* (%): 493 (M<sup>+</sup>, 100), 280 (35), 208 (22), 57 (89); HRMS *m/z* (ESI) calcd for C<sub>30</sub>H<sub>37</sub>ClN<sub>2</sub>S ([M+H]<sup>+</sup>) 493.2439, found 493.2448.

***N,N*-Dibenzyl-4-(2-chloro-10*H*-phenothiazin-10-yl)aniline (3ea):**

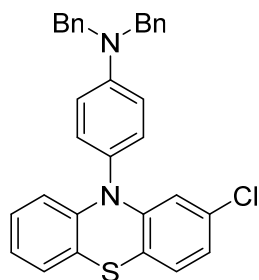

Yellow solid; mp 143.4-144.5 °C (uncorrected); <sup>1</sup>H NMR (500 MHz, CDCl<sub>3</sub>) δ: 7.39-7.36 (m, 4H), 7.31-7.29 (m, 6H), 7.10-7.08 (m, 2H), 6.94-6.92 (m, 1H), 6.89-6.87 (m, 2H), 6.85-6.82 (m, 2H), 6.78-6.75 (m, 1H), 6.73-6.71 (m, 1H), 6.25-6.23 (m, 2H), 4.72 (s, 4H); <sup>13</sup>C NMR (125 MHz, CDCl<sub>3</sub>) δ : 149.2, 146.1, 144.3, 138.0, 132.5, 131.4, 128.8, 128.7, 128.7, 127.2, 127.1, 127.0, 126.9, 126.6, 126.5, 122.5, 121.7, 119.2, 118.0, 116.0, 115.7, 114.0, 54.3; HRMS *m/z* (ESI) calcd for C<sub>32</sub>H<sub>25</sub>ClN<sub>2</sub>S ([M+H]<sup>+</sup>) 505.1500, found 505.1513.

**4-(2-Chloro-10*H*-phenothiazin-10-yl)-*N,N*-diisopropylaniline (3fa):**

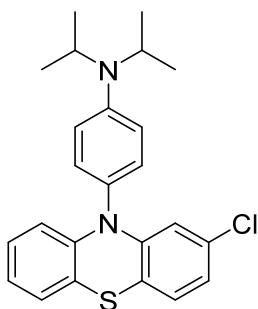

White solid; mp 153.3-155.6 °C (uncorrected); <sup>1</sup>H NMR (500 MHz, CDCl<sub>3</sub>) δ: 7.10 (d, *J* = 10.0 Hz, 2H), 6.98 (d, *J* = 5.0 Hz, 2H), 6.95-6.93 (m, 1H), 6.87-6.82 (m, 2H), 6.79-6.76 (m, 1H), 6.73-6.71 (m, 1H), 6.28-6.26 (m, 2H), 3.93-3.85 (m, 2H), 1.32 (d, *J* = 5.0 Hz, 12H); <sup>13</sup>C NMR (125 MHz, CDCl<sub>3</sub>) δ : 148.1, 146.2, 144.4, 132.6, 130.7, 128.4, 127.0, 126.9, 126.4, 122.4, 121.7, 119.1, 118.1, 117.9, 116.1, 115.7, 47.5, 21.3; LRMS (EI, 70eV) *m/z* (%): 408 (M<sup>+</sup>,78), 393 (100), 351 (53), 232 (41); HRMS *m/z* (ESI) calcd for C<sub>24</sub>H<sub>25</sub>ClN<sub>2</sub>S ([M+H]<sup>+</sup>) 409.1500, found 409.1512.

**4-(2-Chloro-10H-phenothiazin-10-yl)-N-ethyl-N-methylaniline (3ga):**

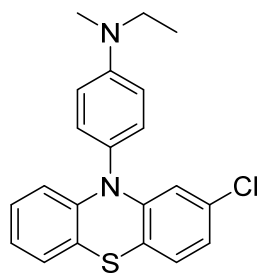

Yellow solid; mp 152.1-154.3 °C (uncorrected); <sup>1</sup>H NMR (500 MHz, CDCl<sub>3</sub>) δ: 7.17-7.15 (m, 2H), 6.95-6.94 (m, 1H), 6.86-6.81 (m, 4H), 6.79-6.76 (m, 1H), 6.73-6.71 (m, 1H), 6.25-6.23 (m, 2H), 3.50-3.46 (m, 2H), 3.00 (s, 3H), 1.22 (t, *J* = 7.5 Hz, 3H); <sup>13</sup>C NMR (125 MHz, CDCl<sub>3</sub>) δ : 148.8, 146.2, 144.5, 132.6, 131.4, 127.8, 127.0, 126.9, 126.4, 122.4, 121.7, 119.1, 117.9, 116.0, 115.6, 113.5, 46.8, 37.5, 11.5.; LRMS (EI, 70eV) *m/z* (%): 366 (M<sup>+</sup>, 100), 351 (77), 336 (21), 175 (19); HRMS *m/z* (ESI) calcd for C<sub>21</sub>H<sub>19</sub>ClN<sub>2</sub>S ([M+H]<sup>+</sup>) 367.1030, found 367.1037.

**N-Benzyl-4-(2-chloro-10H-phenothiazin-10-yl)-N-methylaniline (3ha):**

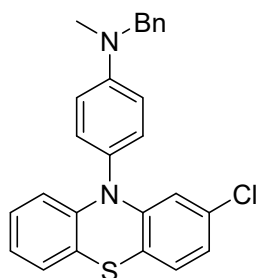

Yellow solid; mp 133.4-134.1 °C (uncorrected); <sup>1</sup>H NMR (500 MHz, CDCl<sub>3</sub>) δ: 7.39-7.36 (m, 2H), 7.30-7.27 (m, 3H), 7.16-7.14 (m, 2H), 6.95-6.94 (m, 1H), 6.90-6.89 (m, 2H), 6.86-6.81 (m, 2H), 6.79-6.77 (m, 1H), 6.74-6.72 (m, 1H), 6.24-6.22 (m, 2H), 4.62 (s, 2H), 3.12 (s, 3H); <sup>13</sup>C NMR (125 MHz, CDCl<sub>3</sub>) δ: 149.5, 146.2, 144.4, 138.5, 132.6, 131.4, 128.7, 128.4, 127.1, 127.0, 126.9, 126.6, 126.5, 122.5, 121.7, 119.1, 117.9, 116.0, 115.6, 113.8, 56.7, 38.7; LRMS (EI, 70eV) *m/z* (%): 428 (M<sup>+</sup>, 95), 337 (100), 281 (35), 207 (55); HRMS *m/z* (ESI) calcd for C<sub>26</sub>H<sub>21</sub>ClN<sub>2</sub>S ([M+H]<sup>+</sup>) 429.1187, found 429.1190.

***N*-(4-(2-Chloro-10*H*-phenothiazin-10-yl)phenyl)-*N*-methylnaphthalen-2-amine**

**(3ia):**

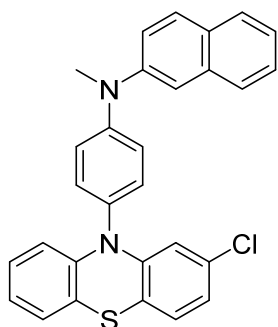

Yellow solid; mp 117.9-119.9 °C (uncorrected); <sup>1</sup>H NMR (500 MHz, CDCl<sub>3</sub>) δ: 7.96-7.94 (m, 2H), 7.63 (d, *J* = 10.0 Hz, 1H), 7.52-7.49 (m, 2H), 7.46-7.43 (m, 1H), 7.04-7.01 (m, 2H), 6.88-6.86 (m, 1H), 6.75 (d, *J* = 10.0 Hz, 1H), 6.73-6.63 (m, 6H), 5.91-5.87 (m, 2H), 3.25 (s, 3H); <sup>13</sup>C NMR (125 MHz, CDCl<sub>3</sub>)

δ : 148.3, 145.3, 143.9, 142.3, 133.2, 132.4, 132.4, 131.4, 130.3, 128.9, 128.5, 128.2, 127.6, 126.9, 126.8, 126.4, 126.0, 124.0, 122.8, 122.1, 119.7, 118.7, 118.5, 116.2, 115.9, 39.0; LRMS (EI, 70eV) *m/z* (%): 464 (M<sup>+</sup>, 100), 336 (6), 232 (16), 217 (15); HRMS *m/z* (ESI) calcd for C<sub>29</sub>H<sub>21</sub>ClN<sub>2</sub>S ([M+H]<sup>+</sup>) 465.1187, found 465.1193.

**2-Chloro-10-(4-(pyrrolidin-1-yl)phenyl)-10*H*-phenothiazine (3ja):**

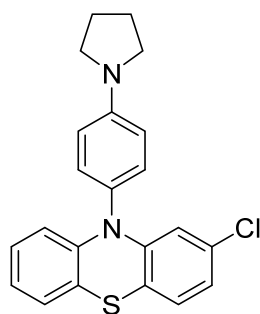

Red solid; mp 146.3-148.1 °C (uncorrected); <sup>1</sup>H NMR (500 MHz, CDCl<sub>3</sub>) δ: 7.17-7.15 (m, 2H), 6.95-6.93 (m, 1H), 6.85 (d, *J* = 10.0 Hz, 1H), 6.83-6.75 (m, 2H), 6.73-6.71 (m, 3H), 6.25-6.23 (m, 2H), 3.37 (t, *J* = 7.5 Hz, 4H), 2.08-2.05 (m, 4H); <sup>13</sup>C NMR (125

MHz, CDCl<sub>3</sub>) δ : 147.5, 146.3, 144.50, 132.6, 131.4, 127.3, 127.0, 126.9, 126.4, 122.4, 121.6, 119.0, 117.8, 116.0, 115.6, 113.1, 47.7, 25.6; LRMS (EI, 70eV) *m/z* (%): 378 (M<sup>+</sup>, 100), 232 (16), 207 (18), 189 (16); HRMS *m/z* (ESI) calcd for C<sub>22</sub>H<sub>19</sub>ClN<sub>2</sub>S ([M+H]<sup>+</sup>) 379.1030, found 379.1041.



**2-Chloro-10-(4-(piperidin-1-yl)phenyl)-10H-phenothiazine (3ka):**

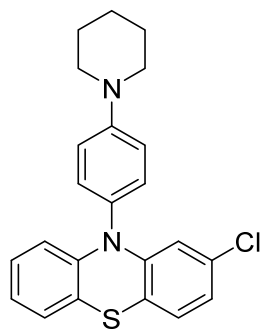

Red solid; mp 140.3-143.2 °C (uncorrected); <sup>1</sup>H NMR (500 MHz, CDCl<sub>3</sub>) δ: 7.20-7.18 (m, 2H), 7.11-7.09 (m, 2H), 6.96-6.94 (m, 1H), 6.86-6.85 (m, 1H), 6.84-6.78 (m, 2H), 6.74-6.72 (m, 1H), 3.27 (t, *J* = 7.5 Hz), 1.78-1.73 (m, 4H), 1.64-1.61 (m, 2H); <sup>13</sup>C NMR (125 MHz, CDCl<sub>3</sub>) δ : 151.7, 145.9, 144.2, 132.6, 131.3, 130.4, 127.0, 126.9, 126.5, 122.5, 121.8, 119.1, 117.9, 117.6, 116.0, 115.6, 49.9, 25.8, 24.2; LRMS (EI, 70eV) *m/z* (%): 392 (M<sup>+</sup>, 100), 273 (8), 232 (13), 190 (11); HRMS *m/z* (ESI) calcd for C<sub>23</sub>H<sub>21</sub>ClN<sub>2</sub>S ([M+H]<sup>+</sup>) 393.1187, found 393.1192.

**4-(4-(2-Chloro-10H-phenothiazin-10-yl)phenyl)morpholine (3la):**

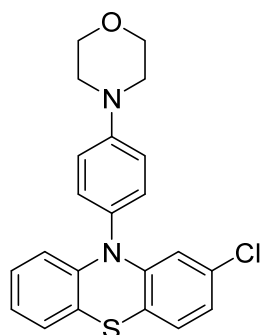

Red solid; mp 195.1-198.2 °C (uncorrected); <sup>1</sup>H NMR (500 MHz, CDCl<sub>3</sub>) δ: 7.25-7.23 (m, 2H), 7.10-7.08 (m, 2H), 6.97-6.95 (m, 1H), 6.86 (d, *J* = 5.0 Hz, 1H), 6.84-6.77 (m, 2H), 6.75-6.73 (m, 1H), 6.19-6.17 (m, 2H), 3.91 (t, *J* = 5.0 Hz, 4H), 3.27 (t, *J* = 5.0 Hz, 4H); <sup>13</sup>C NMR (125 MHz, CDCl<sub>3</sub>) δ: 150.9, 145.8, 144.1, 132.6, 131.6, 131.5, 127.1, 127.0, 126.5, 122.6, 121.9, 119.2, 118.0, 117.0, 115.9, 115.6, 66.8, 48.7; LRMS (EI, 70eV) *m/z* (%): 394 (M<sup>+</sup>, 100), 341 (8), 232 (6), 153 (16); HRMS *m/z* (ESI) calcd for C<sub>22</sub>H<sub>19</sub>ClN<sub>2</sub>OS ([M+H]<sup>+</sup>) 395.0979, found 395.0986.

**2-Chloro-10-(1-methyl-1,2,3,4-tetrahydroquinolin-6-yl)-10H-phenothiazine (3ma):**

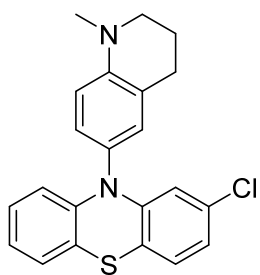

Yellow solid; mp 118.5-188.9 °C (uncorrected); <sup>1</sup>H NMR (500 MHz, CDCl<sub>3</sub>) δ: 7.01-6.99 (m, 1H), 6.94-6.92 (m, 1H), 6.68 (d, *J* = 5.0 Hz, 1H), 6.85-6.81 (m, 2H), 6.78-6.75 (m, 1H), 6.72-6.70 (m, 2H), 6.28-6.26 (m, 2H), 3.32 (t, *J* = 5.0 Hz, 2H), 2.97 (s, 3H), 2.79 (t, *J* = 7.5 Hz, 2H); <sup>13</sup>C NMR (125 MHz, CDCl<sub>3</sub>) δ : 146.4, 146.2, 144.4, 132.5, 130.3, 129.2, 127.8, 127.0, 126.9, 126.4, 124.9, 122.4, 121.6, 119.1, 117.8, 116.0, 115.6, 111.9, 51.1, 39.0, 27.8, 22.1; LRMS (EI, 70eV) *m/z* (%): 378 (M<sup>+</sup>, 100), 232 (24), 189 (14), 144 (14); HRMS *m/z* (ESI) calcd for C<sub>22</sub>H<sub>19</sub>ClN<sub>2</sub>S ([M+H]<sup>+</sup>) 379.1030, found 379.1038.

**2-Chloro-10-(2,3,6,7-tetrahydro-1H,5H-pyrido[3,2,1-i]quinolin-9-yl)-10H-phenothiazine (3na):**

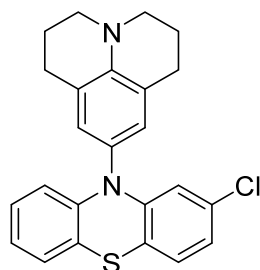

Yellow solid; mp 183.1-185.3 °C (uncorrected); <sup>1</sup>H NMR (500 MHz, CDCl<sub>3</sub>) δ: 6.93-6.91 (m, 1H), 6.86-6.82 (m, 2H), 6.78-6.74 (m, 1H), 6.72-6.70 (m, 3 H), 6.33-6.31 (m, 2H), 3.22 (t, *J* = 5.0 Hz, 4H), 2.78 (t, *J* = 5.0 Hz, 4H), 2.04-2.00 (m, 4H); <sup>13</sup>C NMR (125 MHz, CDCl<sub>3</sub>) δ: 146.2, 144.4, 142.6, 132.5, 128.4, 127.3, 126.9, 126.9, 126.3, 123.3, 122.3, 121.5, 119.0, 117.8, 116.1, 115.7, 49.9, 27.7, 21.8; LRMS (EI, 70eV) *m/z* (%): 404 (M<sup>+</sup>, 99), 341 (45), 281 (53), 207 (100); HRMS *m/z* (ESI) calcd for C<sub>24</sub>H<sub>21</sub>ClN<sub>2</sub>S ([M+H]<sup>+</sup>) 405.1187, found 405.1194.

**4-(2-Chloro-10H-phenothiazin-10-yl)-N,N-diethylnaphthalen-1-amine (3oa):**

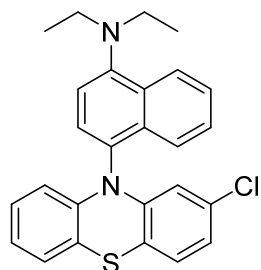

Red solid; mp 121.3-123.1 °C (uncorrected); <sup>1</sup>H NMR (500 MHz, CDCl<sub>3</sub>) δ: 8.39 (d, *J* = 10 Hz, 1H), 8.02 (d, *J* = 10.0 Hz, 1H), 7.53-7.49 (m, 4H), 7.45-7.42 (m, 1H), 7.26 (t, *J* = 5.0 Hz, 1H), 6.99-6.97 (m, 1H), 6.89 (d, *J* = 5.0 Hz, 1H), 6.78-6.75 (m, 1H), 6.73-6.70 (m, 2H), 6.06-6.04 (m, 2H), 3.33-3.29 (m, 4H), 1.15 (t, *J* = 7.5 Hz, 6H); <sup>13</sup>C NMR (125 MHz, CDCl<sub>3</sub>) δ : 149.3, 145.2, 143.5, 132.7, 132.5, 132.1, 131.0, 129.0, 127.1, 127.1, 126.5, 125.9, 125.3, 123.5, 122.7, 122.1, 119.4, 118.2, 117.8, 116.1, 115.7, 47.4, 12.3; LRMS (EI, 70eV) *m/z* (%): 430 (M<sup>+</sup>, 100), 415 (12), 232 (47), 183 (44); HRMS *m/z* (ESI) calcd for C<sub>26</sub>H<sub>23</sub>ClN<sub>2</sub>S ([M+H]<sup>+</sup>) 431.1341, found 431.1344.

**4-(2-Chloro-10H-phenothiazin-10-yl)-3,5-dimethoxyaniline (3pa) :**

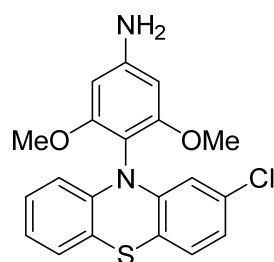

Yellow liquid; <sup>1</sup>H NMR (500 MHz, CDCl<sub>3</sub>) δ: 6.88-6.87 (m, 1H), 6.82-6.77 (m, 2H), 6.74-6.71 (m, 1H), 6.68-6.66 (m, 1H), 6.14-6.10 (m, 2H), 6.00 (s, 2H), 3.95 (s, 2H), 3.68 (s, 6H); <sup>13</sup>C NMR (125 MHz, CDCl<sub>3</sub>) δ : 158.5, 148.4, 144.5, 142.6, 132.5, 127.0, 126.7, 126.2, 122.2, 121.4, 119.1, 117.9, 115.2, 114.9, 107.4, 92.0, 55.8; LRMS (EI, 70eV) *m/z* (%): 384 (M<sup>+</sup>, 100), 326 (9), 232 (6), 153 (16); HRMS *m/z* (ESI) calcd for C<sub>20</sub>H<sub>17</sub>ClN<sub>2</sub>O<sub>2</sub>S ([M+H]<sup>+</sup>) 385.0772, found 385.0778.

**4-(2-Chloro-10H-phenothiazin-10-yl)-N-ethyl-2-methylaniline (3qa):**

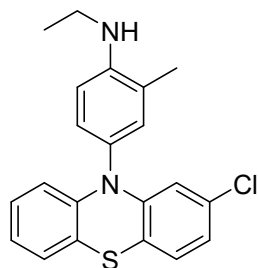

White solid;  $^1\text{H}$  NMR (500 MHz,  $\text{CDCl}_3$ )  $\delta$ : 7.09-7.07 (m, 1H), 7.01 (s, 1H), 6.95-6.93 (m, 1H), 6.85-6.80 (m, 2H), 6.78-6.75 (m, 2H), 6.73-6.70 (m, 1H), 3.61 (s, 1H), 3.30-3.25 (m, 2H), 2.19 (s, 3H), 1.37 (t,  $J = 7.25$  Hz, 3H);  $^{13}\text{C}$  NMR (125 MHz,  $\text{CDCl}_3$ )  $\delta$  : 146.3, 146.1, 144.4, 132.5, 131.8, 129.3, 128.5, 127.0, 126.9, 126.4, 123.9, 122.4, 121.6, 119.0, 117.8, 116.0, 115.6, 110.8, 38.5, 17.6, 14.9; HRMS  $m/z$  (ESI) calcd for  $\text{C}_{21}\text{H}_{19}\text{ClN}_2\text{S}$  ( $[\text{M}+\text{H}]^+$ ) 367.1030, found 367.1044.

**4-(2-Chloro-10H-phenothiazin-10-yl)-N-ethyl-2-fluoroaniline (3ra):**

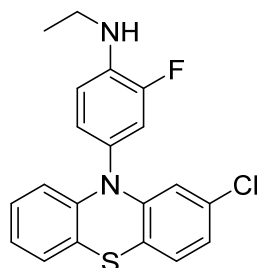

Yellow solid;  $^1\text{H}$  NMR (500 MHz,  $\text{CDCl}_3$ )  $\delta$ : 7.03-6.95 (m, 3H), 6.88-6.76 (m, 4H), 6.76-6.74 (m, 1H), 6.26-6.22 (m, 2H), 4.05 (s, 1H), 3.30-3.26 (m, 2H), 1.36 (t,  $J = 7.25$  Hz, 3H);  $^{13}\text{C}$  NMR (125 MHz,  $\text{CDCl}_3$ )  $\delta$  : 145.8, 144.0, 137.3, 137.3, 132.7, 127.8, 127.7, 127.3, 127.3, 127.2, 127.0, 126.6, 122.8, 122.0, 119.3, 118.1, 116.9, 116.8, 115.9, 115.6, 112.6, 112.6, 38.1, 14.8;  $^{19}\text{F}$  NMR (471 MHz,  $\text{CDCl}_3$ )  $\delta$  : -132.97; HRMS  $m/z$  (ESI) calcd for  $\text{C}_{21}\text{H}_{19}\text{ClFN}_2\text{S}$  ( $[\text{M}+\text{H}]^+$ ) 371.0780, found 371.0796.

**4-(2-Chloro-10H-phenothiazin-10-yl)-N,N-diethyl-3,5-dimethoxyaniline (3sa):**

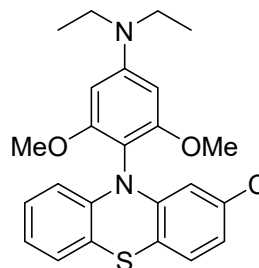

Red solid; mp 183.3-185.1  $^\circ\text{C}$  (uncorrected);  $^1\text{H}$  NMR (500 MHz,  $\text{CDCl}_3$ )  $\delta$ : 6.89-6.87 (m, 1H), 6.83-6.78 (m, 2H), 6.74-6.71 (m, 1H), 6.68-6.66 (m, 1H), 6.17-6.15 (m, 2H), 5.96 (s, 2H), 3.73 (s, 6H), 3.44-3.40 (m, 4H), 1.26 (t,  $J = 7.5$  Hz, 6H);  $^{13}\text{C}$  NMR (125 MHz,  $\text{CDCl}_3$ )  $\delta$  : 158.5, 149.3, 145.0, 143.1, 132.5, 127.0, 126.7, 126.1,

122.1, 121.3, 119.2, 118.0, 115.4, 115.2, 105.4, 88.8, 55.8, 44.6, 12.7; LRMS (EI, 70eV)  $m/z$  (%): 440 ( $M^+$ , 100), 398 (10), 396 (23), 212 (11); HRMS  $m/z$  (ESI) calcd for  $C_{24}H_{25}ClN_2O_2S$  ( $[M+H]^+$ ) 441.1398, found 441.1412.

**4-(2-Chloro-10H-phenothiazin-10-yl)-N,N-diethyl-3,5-dimethylaniline (3ta):**

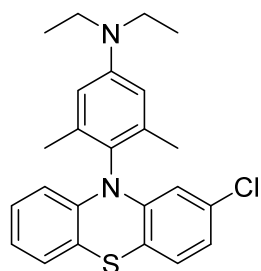

Yellow solid; mp 119.0-120.8 °C (uncorrected);  $^1H$  NMR (500 MHz,  $CDCl_3$ )  $\delta$ : 6.86-6.84 (m, 1H), 6.79-6.75 (m, 2H), 6.73-6.70 (m, 1H), 6.67-6.65 (m, 1H), 6.50 (s, 2H), 5.99-5.97 (m, 2H), 3.41-3.37 (m, 4H), 2.12 (s, 6H), 1.23 (t,  $J = 7.5$  Hz, 6H);  $^{13}C$  NMR (125 MHz,  $CDCl_3$ )  $\delta$ : 147.6, 143.5, 141.6, 138.3, 132.8, 127.3, 126.8, 126.1, 125.0, 122.2, 121.4, 118.1, 116.8, 114.7, 114.1, 112.0, 44.2, 18.5, 12.7.; LRMS (EI, 70eV)  $m/z$  (%): 408 ( $M^+$ , 100), 393 (50), 364 (28), 196 (14); HRMS  $m/z$  (ESI) calcd for  $C_{24}H_{25}ClN_2S$  ( $[M+H]^+$ ) 409.1500, found 409.1509.

**4-(2-Chloro-10H-phenothiazin-10-yl)-N,N-diethyl-3-methylaniline (3ua):**

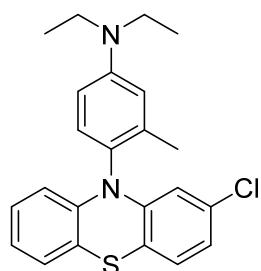

Yellow solid; mp 114.9-116.9 °C (uncorrected);  $^1H$  NMR (500 MHz,  $CDCl_3$ )  $\delta$ : 7.05-7.03 (m, 1H), 6.90-6.88 (m, 1H), 6.82-6.78 (m, 2H), 6.75-6.72 (m, 1H), 6.70-6.68 (m, 1H), 6.65-6.63 (m, 2H), 6.13-6.11 (m, 2H), 3.42-3.38 (m, 4H), 2.12 (s, 3H), 1.23 (t,  $J = 7.5$  Hz, 6H);  $^{13}C$  NMR (125 MHz,  $CDCl_3$ )  $\delta$ : 147.8, 145.0, 143.1, 138.4, 132.7, 131.5, 127.1, 126.9, 126.3, 125.9, 122.3, 121.5, 118.6, 117.4, 115.5, 115.0, 114.0, 110.9, 44.3, 18.2, 12.7; LRMS (EI, 70eV)  $m/z$  (%): 394 ( $M^+$ , 100), 350 (33), 281 (8), 189 (13); HRMS  $m/z$  (ESI) calcd for  $C_{23}H_{23}ClN_2S$  ( $[M+H]^+$ ) 395.1343, found 395.1349.

**4-(2-Chloro-10H-phenothiazin-10-yl)-N,N-diethyl-3-fluoroaniline (3va):**

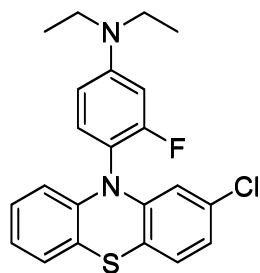

Yellow solid; mp 139.1-141.0 °C (uncorrected); <sup>1</sup>H NMR (500 MHz, CDCl<sub>3</sub>) δ: 7.12 (t, *J* = 7.5 Hz, 1H), 6.98-6.96 (m, 1H), 6.91-6.87 (m, 2H), 6.83-6.79 (m, 1H), 6.77-6.75 (m, 1H), 6.54 (s, 1H), 6.53-6.51 (m, 1H), 6.28-6.26 (m, 2H), 3.42-3.38 (m, 4H), 1.23 (t, *J* = 7.5 Hz, 6H); <sup>13</sup>C NMR (125 MHz, CDCl<sub>3</sub>) δ : 162.3, 160.3, 149.7, 149.7, 145.4, 143.5, 132.8, 132.3, 132.3, 127.2, 127.1, 126.6, 122.8, 122.1, 119.6, 118.5, 115.6, 115.4, 113.8, 113.7, 108.4, 108.4, 99.3, 99.1, 44.6, 12.5; <sup>19</sup>F NMR (471 MHz, CDCl<sub>3</sub>) δ : -110.25; LRMS (EI, 70eV) *m/z* (%): 398 (M<sup>+</sup>, 100), 383 (48), 354 (35), 191 (11); HRMS *m/z* (ESI) calcd for C<sub>22</sub>H<sub>20</sub>ClFN<sub>2</sub>S ([M+H]<sup>+</sup>) 399.1093, found 399.1102.

**4-(2-Chloro-10H-phenothiazin-10-yl)-N,N-diethyl-2-methylaniline (3wa):**

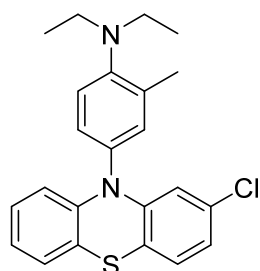

Yellow solid; mp 101.3-103.3 °C (uncorrected); <sup>1</sup>H NMR (500 MHz, CDCl<sub>3</sub>) δ: 7.23 (d, *J* = 10 Hz, 1H), 7.13 (t, *J* = 7.5 Hz, 2H), 6.95 (d, *J* = 5.0 Hz, 1H), 6.87-6.72 (m, 4H), 6.19 (d, *J* = 5.0 Hz), 3.10-3.05 (m, 4H), 2.34 (s, 3H), 1.07 (t, *J* = 5.0 Hz, 6H); <sup>13</sup>C NMR (125 MHz, CDCl<sub>3</sub>) δ : 150.3, 145.7, 144.0, 137.6, 134.3, 132.8, 132.5, 128.2, 127.1, 126.9, 126.5, 123.7, 122.6, 121.8, 119.2, 118.0, 116.0, 115.7, 47.0, 18.6, 12.5; LRMS (EI, 70eV) *m/z* (%): 394 (M<sup>+</sup>, 98), 379 (100), 350 (21), 232 (10); HRMS *m/z* (ESI) calcd for C<sub>23</sub>H<sub>23</sub>ClN<sub>2</sub>S ([M+H]<sup>+</sup>) 395.1343, found 395.1348.

**2-(2-Chloro-10H-phenothiazin-10-yl)-5-(dimethylamino)phenol (3xa):**

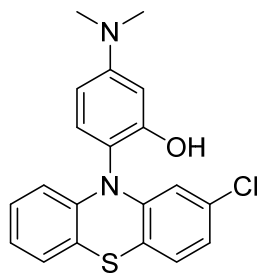

Yellow solid; mp 137.4-140.1 °C (uncorrected); <sup>1</sup>H NMR (500 MHz, CDCl<sub>3</sub>) δ: 7.17 (t, *J* = 5.0 Hz, 1H), 7.06-7.05 (m, 1H), 6.96 (d, *J* = 5.0 Hz, 1H), 6.95-6.91 (m, 1H), 6.90-6.87 (m, 1H), 6.85-6.83 (m, 1H), 6.48-6.45 (m, 4H), 5.74 (s, 1H), 3.04 (s, 6H); <sup>13</sup>C NMR (125 MHz, CDCl<sub>3</sub>) δ : 153.4, 151.9, 145.6, 143.7, 133.1, 131.6, 127.4, 126.8, 123.5, 122.9, 120.9, 119.8, 116.3, 116.2, 114.2, 105.8, 99.7, 40.4; LRMS (EI, 70eV) *m/z* (%): 368 (M<sup>+</sup>, 100), 232 (9), 184 (14), 137 (22); HRMS *m/z* (ESI) calcd for C<sub>20</sub>H<sub>17</sub>ClN<sub>2</sub>OS ([M+H]<sup>+</sup>) 369.0823, found 369.0831.

**2-(2-Chloro-10H-phenothiazin-10-yl)-*N,N*,4-trimethylaniline (3ya):**

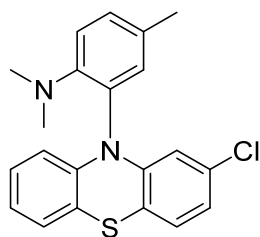

Yellow solid; mp 117.9-119.2 °C (uncorrected); <sup>1</sup>H NMR (500 MHz, CDCl<sub>3</sub>) δ: 7.19-7.17 (m, 1H), 7.02 (d, *J* = 10.0 Hz, 1H), 6.95 (d, *J* = 5.0 Hz, 1H), 6.93-6.91 (m, 1H), 6.83-6.75 (m, 3H), 6.73-6.71 (m, 1H), 6.19-6.16 (m, 2H), 2.79 (s, 6H), 2.33 (s, 3H); <sup>13</sup>C NMR (125 MHz, CDCl<sub>3</sub>) δ : 148.6, 144.8, 143.1, 133.7, 132.6, 131.2, 130.2, 129.9, 126.9, 126.4, 122.7, 121.9, 119.8, 118.9, 117.7, 115.8, 115.4, 43.2, 20.4; LRMS (EI, 70eV) *m/z* (%): 366 (M<sup>+</sup>, 100), 334 (11), 323 (15), 118 (11); HRMS *m/z* (ESI) calcd for C<sub>21</sub>H<sub>19</sub>ClN<sub>2</sub>S ([M+H]<sup>+</sup>) 367.1030, found 367.1036.

**2-(2-Chloro-10H-phenothiazin-10-yl)-4-methoxy-*N,N*-dimethylaniline(3za):**

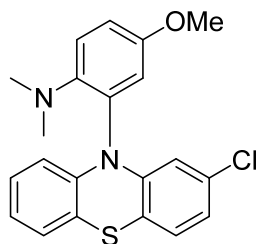

Yellow solid; mp 121.5-123.2 °C (uncorrected); <sup>1</sup>H NMR (500 MHz, CDCl<sub>3</sub>) δ: 7.14 (d, *J* = 10.0 Hz, 1H), 7.00-6.98 (m, 1H), 6.95-6.93 (m, 1H), 6.86-6.79 (m, 3H), 6.76-6.73 (m, 2H), 3.80 (s,

3H), 2.74 (m, 6H);  $^{13}\text{C}$  NMR (125 MHz,  $\text{CDCl}_3$ )  $\delta$  : 154.9, 145.1, 144.6, 142.9, 132.6, 131.9, 127.0, 126.5, 122.8, 122.0, 121.7, 118.9, 118.2, 117.7, 115.7, 115.3, 115.3, 55.8, 43.7; LRMS (EI, 70eV)  $m/z$  (%): 382 ( $\text{M}^+$ , 100), 350 (11), 339 (9), 232 (11); HRMS  $m/z$  (ESI) calcd for  $\text{C}_{21}\text{H}_{19}\text{ClN}_2\text{OS}$  ( $[\text{M}+\text{H}]^+$ ) 383.0797, found 383.0802.

**4-Bromo-2-(2-chloro-10H-phenothiazin-10-yl)-N,N-dimethylaniline(3aaa):**

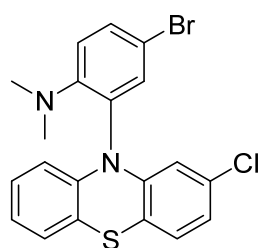

Yellow solid; mp 133.1-134.2 °C (uncorrected);  $^1\text{H}$  NMR (500 MHz,  $\text{CDCl}_3$ )  $\delta$ : 7.49-7.46 (m, 1H), 7.29 (d,  $J = 3.0$  Hz, 1H), 6.97-6.94 (m, 2H), 6.87 (s, 1H), 6.85 (s, 1H), 6.84-6.80 (m, 1H), 6.78-6.76 (m, 1H), 6.21-6.19 (m, 1H), 2.87 (s, 6H);  $^{13}\text{C}$  NMR (125 MHz,  $\text{CDCl}_3$ )  $\delta$  : 150.0, 144.3, 142.7, 136.2, 132.7, 132.5, 131.6, 130.1, 127.2, 126.6, 123.1, 122.4, 120.8, 119.1, 117.9, 115.8, 115.4, 114.1, 111.6, 42.7; LRMS (EI, 70eV)  $m/z$  (%): 431( $\text{M}^+$ , 100), 386 (11), 231 (19), 118 (14); HRMS  $m/z$  (ESI) calcd for  $\text{C}_{20}\text{H}_{16}\text{BrClN}_2\text{S}$  ( $[\text{M}+\text{H}]^+$ ) 430.9979, found 430.9983.

**10-(4-(Diethylamino)phenyl)-10H-phenothiazine-2-carbonitrile (3ab):**

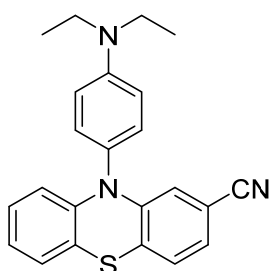

Yellow solid; mp 144.6-146.3 °C (uncorrected);  $^1\text{H}$  NMR (500 MHz,  $\text{CDCl}_3$ )  $\delta$ : 7.07 (d,  $J = 10$  Hz, 2H), 6.95-6.90 (m, 2H), 6.87 (d,  $J = 5.0$  Hz, 1H), 6.84-6.74 (m, 4H), 6.39 (s, 1H), 6.24 (d,  $J = 5.0$  Hz, 1H), 3.44-3.40 (m, 4H), 1.23 (t,  $J = 7.5$  Hz, 6H);  $^{13}\text{C}$  NMR (125 MHz,  $\text{CDCl}_3$ )  $\delta$  : 147.6, 145.5, 143.7, 131.0, 127.3, 126.5, 126.5, 126.3, 126.2, 125.1, 122.7, 119.1, 117.7, 117.6, 116.1, 112.9, 109.9, 44.3, 12.5; LRMS (EI, 70eV)  $m/z$  (%): 371 ( $\text{M}^+$ , 93), 359 (100), 327 (37), 178 (11); HRMS  $m/z$  (ESI) calcd for  $\text{C}_{23}\text{H}_{21}\text{N}_3\text{S}$  ( $[\text{M}+\text{H}]^+$ ) 372.1529, found 372.1538.



***N,N*-Diethyl-4-(2-(trifluoromethyl)-10*H*-phenothiazin-10-yl)aniline (3ac):**

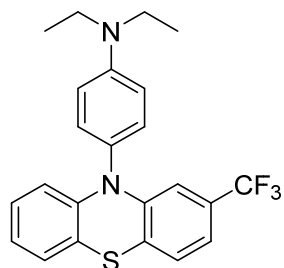

Yellow solid; mp 114.3-116.7 °C (uncorrected); <sup>1</sup>H NMR (500 MHz, CDCl<sub>3</sub>) δ: 7.14-7.12 (m, 2H), 7.01 (d, *J* = 10.0 Hz, 1H), 6.97 (d, *J* = 10.0 Hz, 1H), 6.86-6.76 (m, 4H), 6.48 (s, 1H), 6.26-6.24 (m, 1H), 3.45-3.41 (m, 4H), 1.24 (t, *J* = 5.0 Hz, 6H); <sup>13</sup>C NMR (125 MHz, CDCl<sub>3</sub>) δ : 147.7, 145.5, 144.5, 131.3, 129.4, 129.1, 128.9, 128.6, 127.2, 126.9, 126.5, 126.4, 125.0, 124.2, 122.9, 122.5, 118.4 (q, *J* = 16.0 Hz) , 116.2, 113.0, 111.8 (q, *J* = 16.0 Hz), 44.4, 12.6. ; <sup>19</sup>F NMR (471 MHz, CDCl<sub>3</sub>) δ : -62.83; LRMS (EI, 70eV) *m/z* (%): 414 (M<sup>+</sup>, 91), 399 (100), 370 (34), 266 (14); HRMS *m/z* (ESI) calcd for C<sub>23</sub>H<sub>21</sub>F<sub>3</sub>N<sub>2</sub>S ([M+H]<sup>+</sup>) 415.1450, found 415.1457.

**1-(10-(4-(Diethylamino)phenyl)-10*H*-phenothiazin-2-yl)ethan-1-one (3ad):**

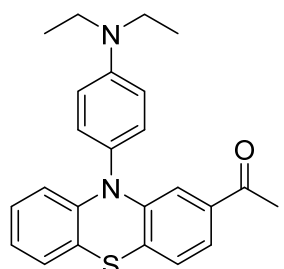

Yellow solid; mp 139.5-141.6 °C (uncorrected); <sup>1</sup>H NMR (500 MHz, CDCl<sub>3</sub>) δ: 7.31-7.29 (m, 1H), 7.15-7.13 (m, 2H), 6.97 (d, *J* = 5.0 Hz, 1H), 6.92-6.90 (m, 1H), 6.84-6.81 (m, 4H), 6.77-6.74 (m, 1H), 6.25-6.23 (m, 1H), 3.44-3.40 (m, 4H), 2.35 (s, 3H), 1.23 (t, *J* = 5.0 Hz, 6H); <sup>13</sup>C NMR (125 MHz, CDCl<sub>3</sub>) δ : 197.3, 147.5, 145.1, 144.5, 135.9, 131.3, 127.2, 127.1, 126.6, 126.3, 126.1, 122.2, 122.2, 118.2, 116.1, 114.3, 113.0, 44.4, 26.4, 12.5; LRMS (EI, 70eV) *m/z* (%): 388 (M<sup>+</sup>, 100), 373 (83), 344 (31), 186 (10); HRMS *m/z* (ESI) calcd for C<sub>24</sub>H<sub>24</sub>N<sub>2</sub>OS ([M+H]<sup>+</sup>) 389.1682, found 389.1688.

***N,N*-Diethyl-4-(2-(methylthio)-10*H*-phenothiazin-10-yl)aniline (3ae):**

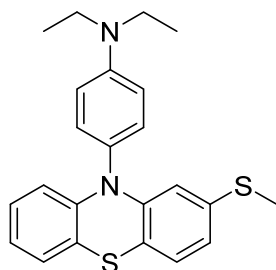

Yellow solid; mp 134.3-136.4 °C (uncorrected); <sup>1</sup>H NMR (500 MHz, CDCl<sub>3</sub>) δ: 7.14-7.13 (m, 2H), 6.95-6.94 (m, 1H), 6.87 (d, *J* = 5.0 Hz, 1H), 6.82-6.79 (m, 3H), 6.77-6.73 (m, 1H), 6.67-6.65 (m, 1H), 6.27-6.24 (m, 2H), 3.44-3.40 (m, 4H), 2.27 (s, 3H), 1.23 (t, *J* = 5.0 Hz, 6H); <sup>13</sup>C NMR (125 MHz, CDCl<sub>3</sub>) δ : 147.5, 145.4, 144.9, 136.8, 131.6, 127.6, 126.8, 126.6, 126.4, 122.0, 120.1, 119.4, 116.4, 116.0, 114.5, 112.9, 44.4, 16.2, 12.6; LRMS (EI, 70eV) *m/z* (%): 392 (M<sup>+</sup>, 100), 377 (72), 348 (28), 188 (13); HRMS *m/z* (ESI) calcd for C<sub>23</sub>H<sub>24</sub>N<sub>2</sub>S<sub>2</sub> ([M+H]<sup>+</sup>) 393.1454, found 393.1461.

***N,N*-Diethyl-4-(2-methoxy-10*H*-phenothiazin-10-yl)aniline (3af):**

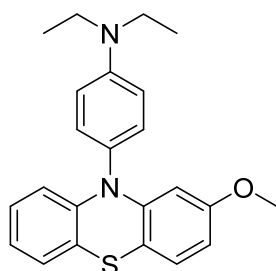

Yellow solid; mp 155.9-157.2 °C (uncorrected); <sup>1</sup>H NMR (500 MHz, CDCl<sub>3</sub>) δ: 7.15-7.13 (d, *J* = 10 Hz, 2H), 6.98-6.96 (m, 1H), 6.87 (d, *J* = 5.0 Hz, 1H), 6.84-6.74 (m, 4H), 6.35-6.33 (m, 1H), 6.30-6.28 (m, 1H), 5.94 (d, *J* = 2.5 Hz, 1H), 3.62 (s, 3H), 3.43-3.38 (m, 4H), 1.22 (t, *J* = 5.0 Hz, 6H); <sup>13</sup>C NMR (125 MHz, CDCl<sub>3</sub>) δ : 159.1, 147.4, 146.4, 144.8, 131.5, 127.8, 126.7, 126.6, 126.4, 121.9, 119.9, 115.8, 112.8, 110.6, 105.6, 103.9, 55.2, 44.4, 12.6; LRMS (EI, 70eV) *m/z* (%): 376 (M<sup>+</sup>, 100), 361 (76), 332 (46), 181 (17); HRMS *m/z* (ESI) calcd for C<sub>23</sub>H<sub>24</sub>N<sub>2</sub>OS ([M+H]<sup>+</sup>) 377.1682, found 377.1693.

***N,N*-Diethyl-4-(2-(prop-1-en-2-yl)-10*H*-phenothiazin-10-yl)aniline (3ag):**

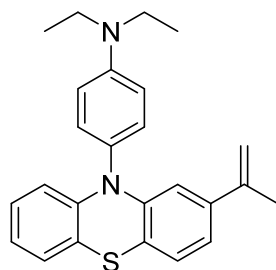

Red solid; mp 97.3-99.1 °C (uncorrected); <sup>1</sup>H NMR (500 MHz, CDCl<sub>3</sub>) δ: 7.17-7.16 (m, 2H), 6.96-6.94 (m, 1H), 6.91 (d, *J* = 10.0 Hz, 1H), 6.87-6.85 (m, 1H), 6.84-6.80 (m, 3H), 6.76-6.72 (m, 1H), 6.42 (d, *J* = 2.0 Hz), 6.28-6.26 (m, 1H), 5.50-5.50 (m, 1H), 4.88 (t, *J* = 3.0 Hz, 1H), 3.44-3.40 (m, 4H), 1.91 (s, 3H), 1.23 (t, *J* = 7.5 Hz, 6H); <sup>13</sup>C NMR (125 MHz, CDCl<sub>3</sub>) δ : 147.4, 145.1, 144.9, 142.9, 140.0, 131.6, 127.9, 126.8, 126.4, 126.1, 121.8, 119.3, 119.2, 118.7, 115.9, 113.0, 112.9, 111.8, 44.4, 21.6, 12.5; LRMS (EI, 70eV) *m/z* (%): 386 (M<sup>+</sup>, 100), 371 (55), 342 (25), 185 (14); HRMS *m/z* (ESI) calcd for C<sub>25</sub>H<sub>26</sub>N<sub>2</sub>S ([M+H]<sup>+</sup>) 387.1889, found 387.1893.

***N,N*-Diethyl-4-(4-nitro-10*H*-phenothiazin-10-yl)aniline (3ah):**

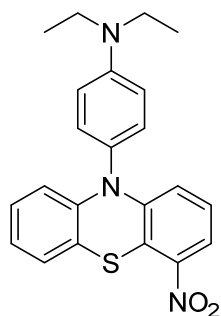

Black solid; mp 141.3-143.1 °C (uncorrected); <sup>1</sup>H NMR (500 MHz, CDCl<sub>3</sub>) δ: 7.44-7.40 (m, 2H), 7.38-7.36 (m, 1H), 7.22-7.17 (m, 2H), 7.14-7.12 (m, 2H), 7.08-7.03 (m, 2H), 6.54-6.52 (m, 2H), 3.29-3.25 (m, 4H), 1.10 (t, *J* = 7.5 Hz, 6H); <sup>13</sup>C NMR (125MHz, CDCl<sub>3</sub>) δ : 145.7, 145.0, 144.0, 137.7, 135.8, 134.4, 130.3, 129.3, 127.8, 127.3, 126.3, 125.1, 124.2, 124.0, 123.0, 112.2, 44.4, 12.5; LRMS (EI, 70eV) *m/z* (%): 391 (M<sup>+</sup>, 100), 376 (89), 299 (27), 164 (74); HRMS *m/z* (ESI) calcd for C<sub>22</sub>H<sub>21</sub>N<sub>3</sub>O<sub>2</sub>S ([M+H]<sup>+</sup>) 392.1427, found 392.1436.

***N,N*-Diethyl-4-(10*H*-phenothiazin-10-yl)aniline (3ai):**

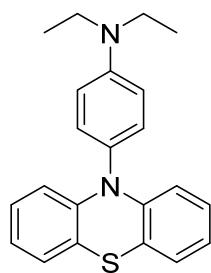

White solid; mp 151.4-153.3 °C (uncorrected); <sup>1</sup>H NMR (500 MHz, CDCl<sub>3</sub>) δ: 7.17-7.15 (m, 2H), 6.97-6.95 (m, 2H), 6.84-6.80 (m, 4H), 6.77-6.73 (m, 2H), 6.29-6.27 (m, 2H), 3.44-3.40 (m, 4H), 1.23 (t, *J* = 5.0 Hz, 6H); <sup>13</sup>C NMR (125 MHz, CDCl<sub>3</sub>) δ : 147.3, 145.1, 131.7, 127.9, 126.8, 126.4, 121.9, 119.3, 115.7, 112.8, 44.4, 12.6; LRMS (EI, 70eV) *m/z* (%): 346 (M<sup>+</sup>, 100), 331 (93), 302 (53), 165 (14); HRMS *m/z* (ESI) calcd for C<sub>22</sub>H<sub>22</sub>N<sub>2</sub>S ([M+H]<sup>+</sup>) 347.1576, found 347.1583.

***N,N*-Diethyl-4-(10*H*-phenoxazin-10-yl)aniline (3aj):**

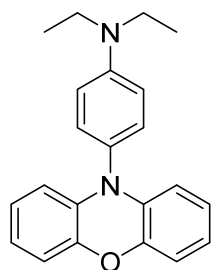

Red solid; mp 147.1-149.1 °C (uncorrected); <sup>1</sup>H NMR (500 MHz, CDCl<sub>3</sub>) δ: 7.09-7.08 (m, 2H), 6.79-6.77 (m, 2H), 6.64-6.62 (m, 2H), 6.59-6.56 (m, 4H), 6.01-6.59 (m, 2H), 3.42-3.37 (m, 4H), 1.22 (t, *J* = 7.5 Hz, 6H); <sup>13</sup>C NMR (125 MHz, CDCl<sub>3</sub>) δ : 147.4, 144.0, 135.2, 131.2, 125.7, 123.1, 120.7, 115.0, 113.3, 113.1, 44.4, 12.6; LRMS (EI, 70eV) *m/z* (%): 330 (M<sup>+</sup>, 100), 315 (62), 286 (61), 182 (42); HRMS *m/z* (ESI) calcd for C<sub>22</sub>H<sub>22</sub>N<sub>2</sub>O ([M+H]<sup>+</sup>) 331.1805, found 331.1812

## (C) Spectra

### 4-(2-Chloro-10*H*-phenothiazin-10-yl)-*N,N*-diethylaniline (3a):

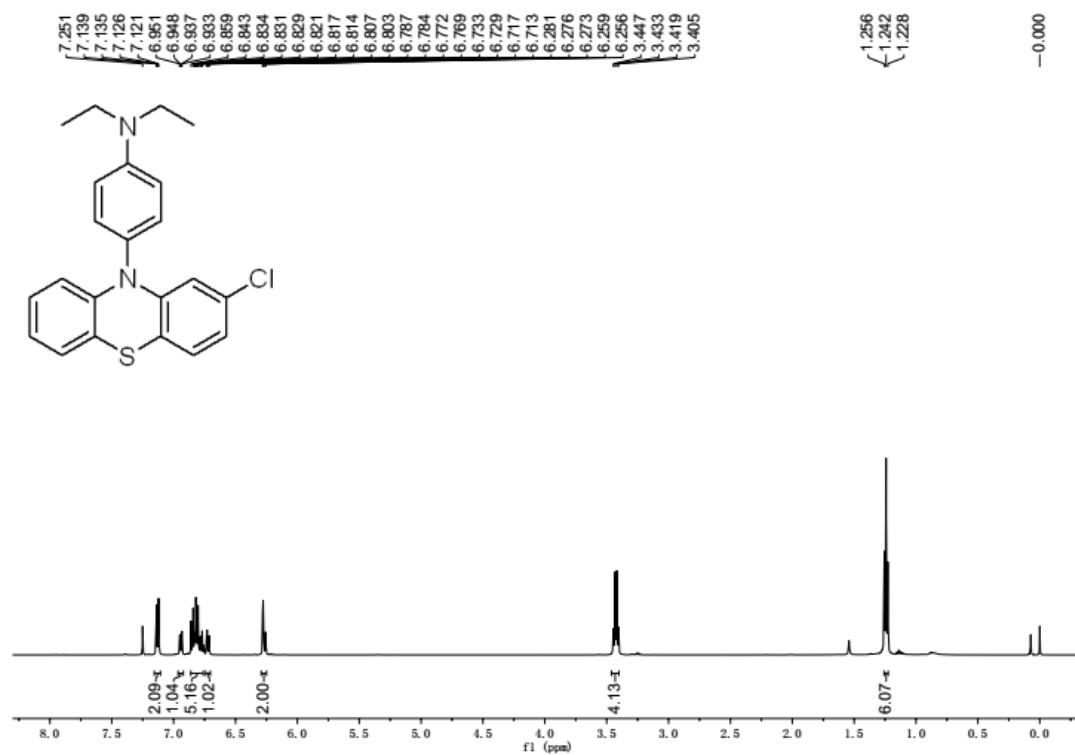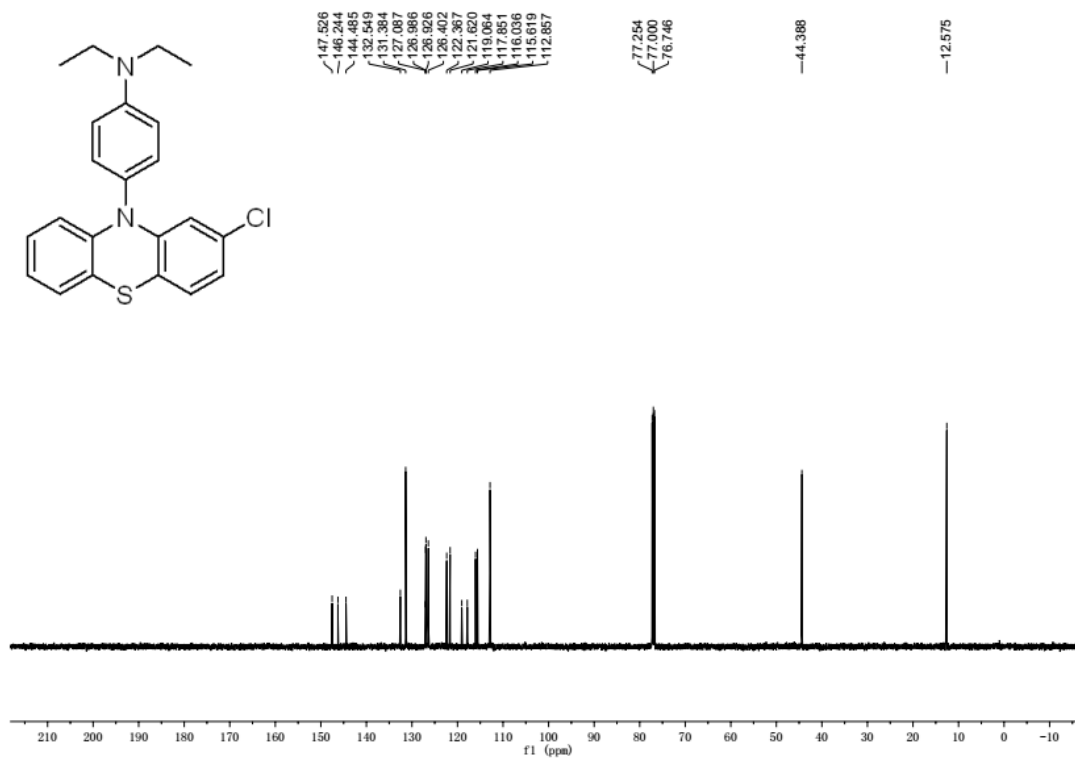

**4-(2-Chloro-10H-phenothiazin-10-yl)-N,N-dimethylaniline (3ba):**

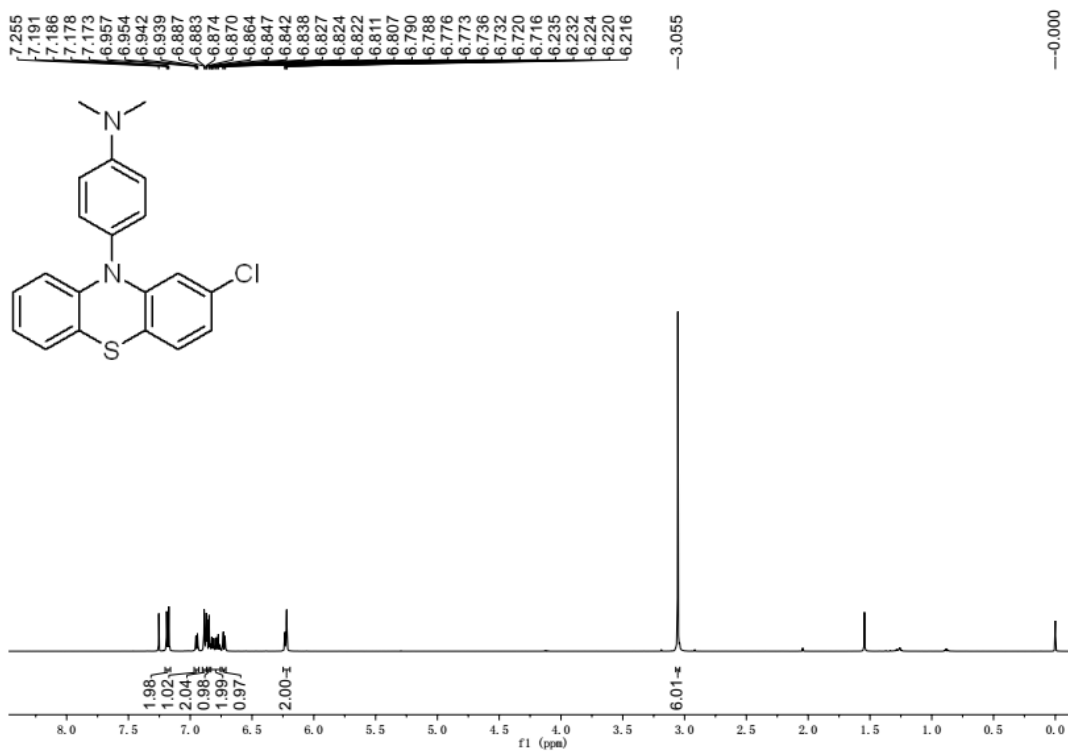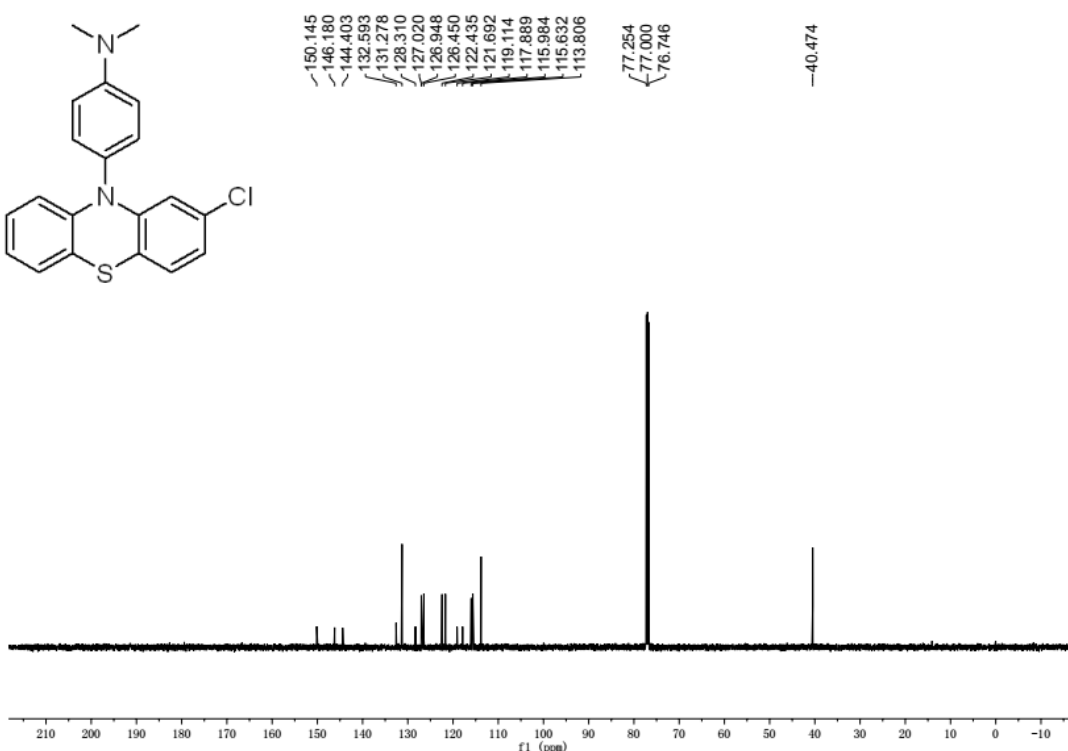

4-(2-Chloro-10H-phenothiazin-10-yl)-N,N-dipropylaniline(3ca):

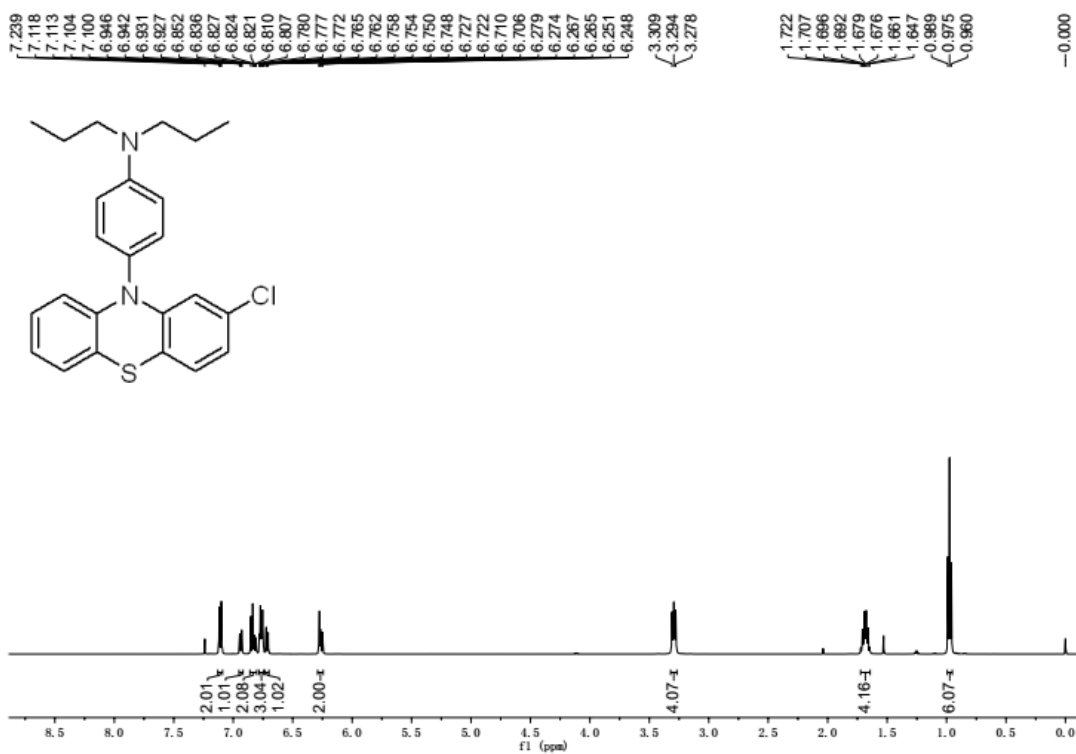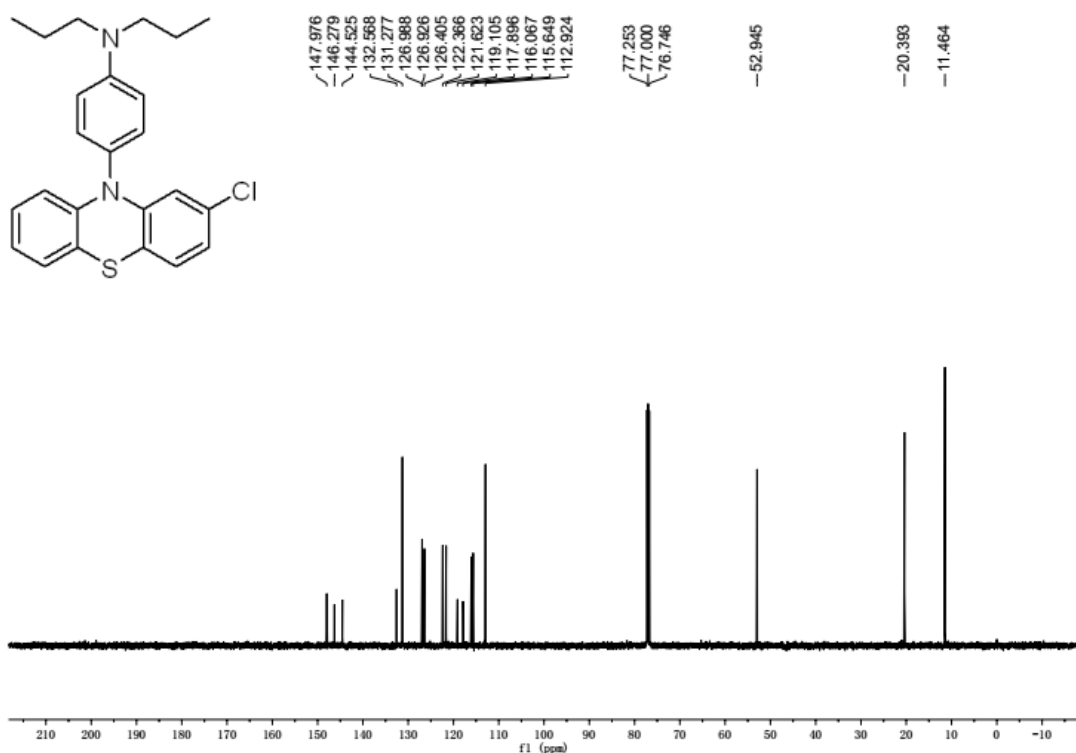

**4-(2-Chloro-10H-phenothiazin-10-yl)-N,N-dihexylaniline (3da):**

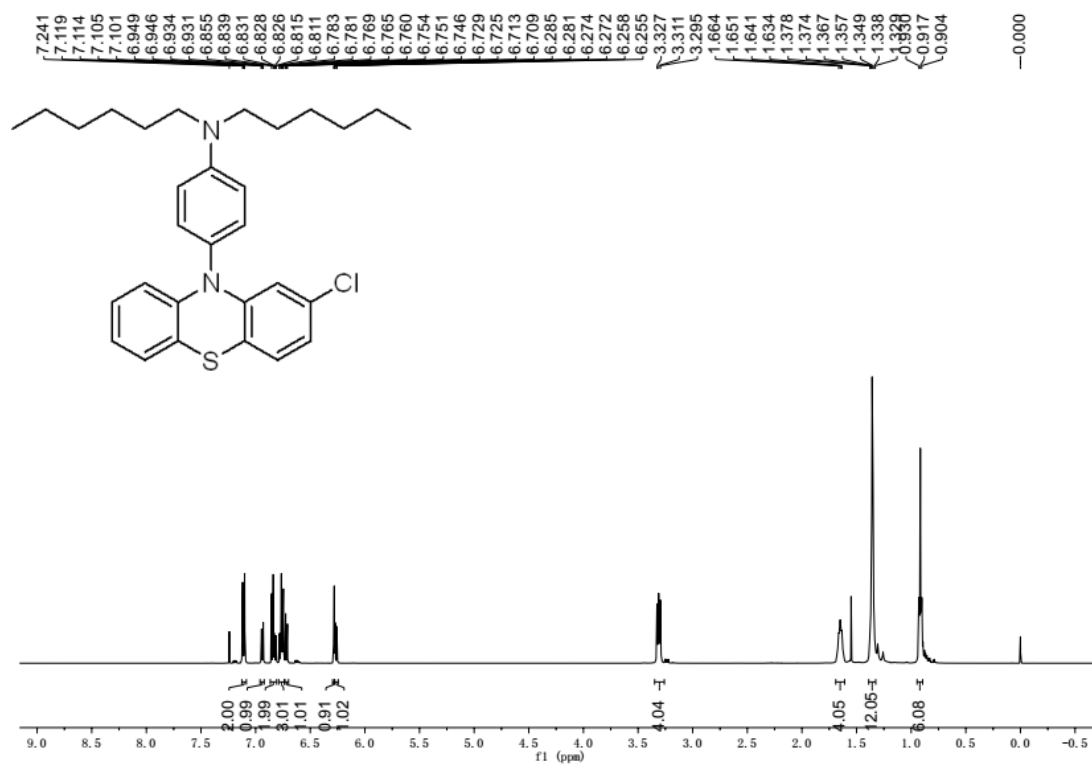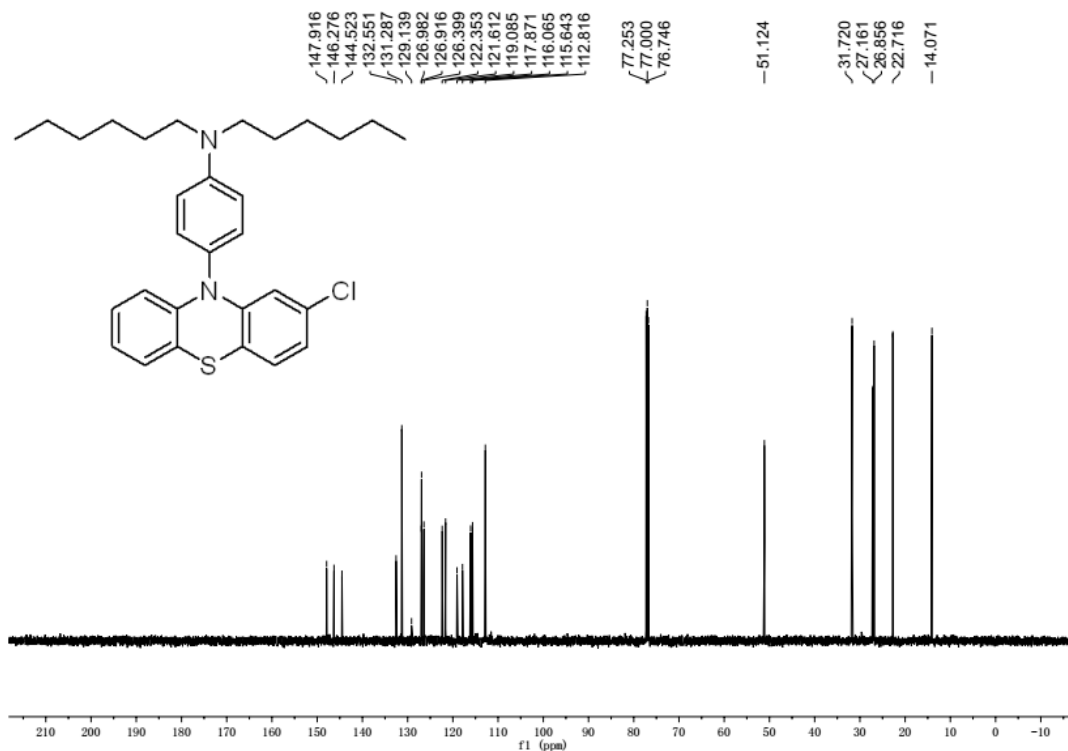



***N,N*-Dibenzyl-4-(2-chloro-10*H*-phenothiazin-10-yl)aniline (3ea):**

7.396  
7.394  
7.391  
7.381  
7.378  
7.369  
7.364  
7.311  
7.307  
7.296  
7.292  
7.236  
7.105  
7.100  
7.091  
7.087  
6.946  
6.943  
6.931  
6.928  
6.894  
6.890  
6.881  
6.876  
6.866  
6.853  
6.841  
6.837  
6.825  
6.821  
6.788  
6.785  
6.773  
6.770  
6.758  
6.755  
6.733  
6.729  
6.717  
6.713  
6.251  
6.249  
6.245  
6.241  
6.235  
6.232  
4.728

-0.000

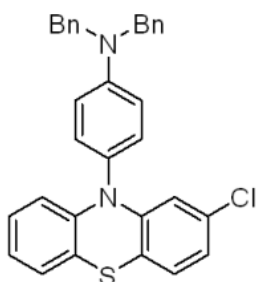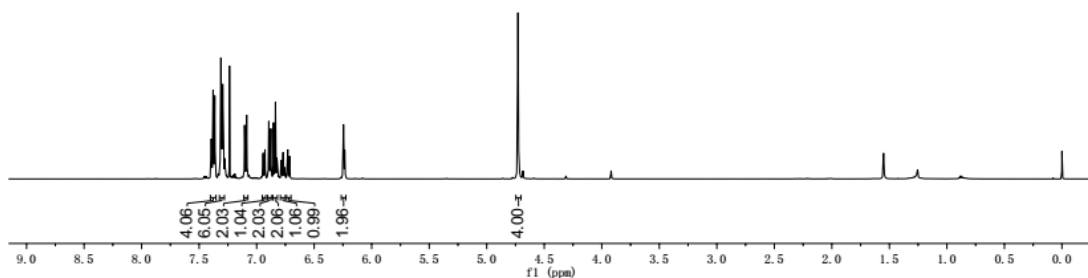

149.151  
146.112  
144.338  
137.983  
132.512  
131.432  
128.772  
128.742  
128.674  
127.106  
127.070  
127.055  
126.922  
126.582  
126.477  
122.468  
121.726  
119.214  
118.028  
116.044  
115.669  
114.005  
77.254  
77.000  
76.746  
-54.306

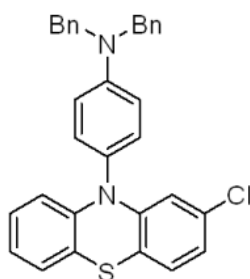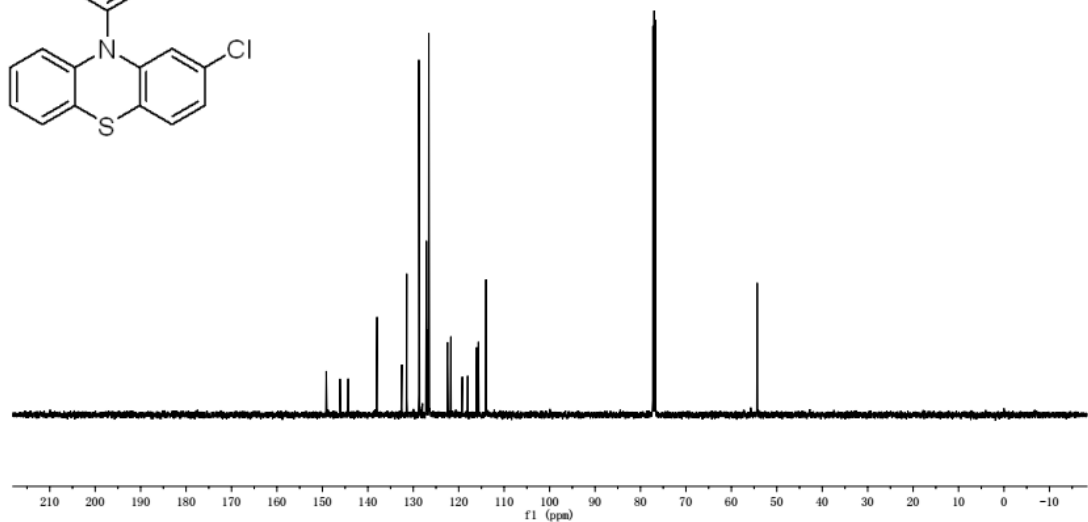

**4-(2-Chloro-10*H*-phenothiazin-10-yl)-*N,N*-diisopropylaniline (3fa):**

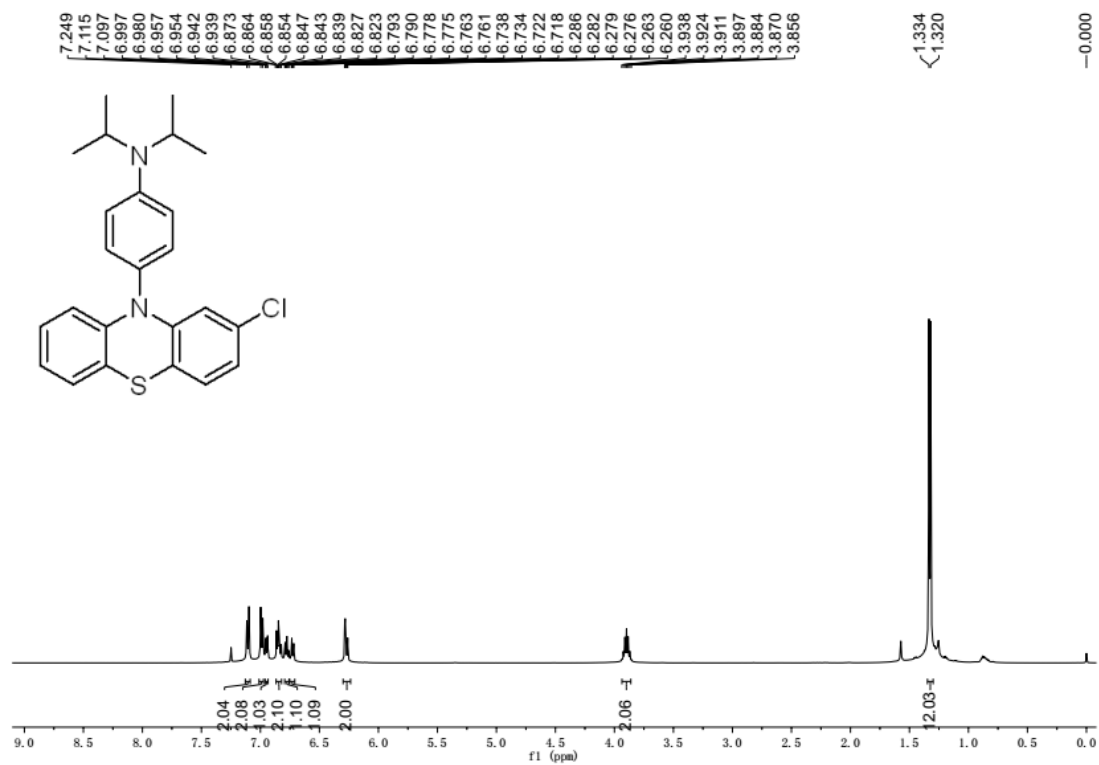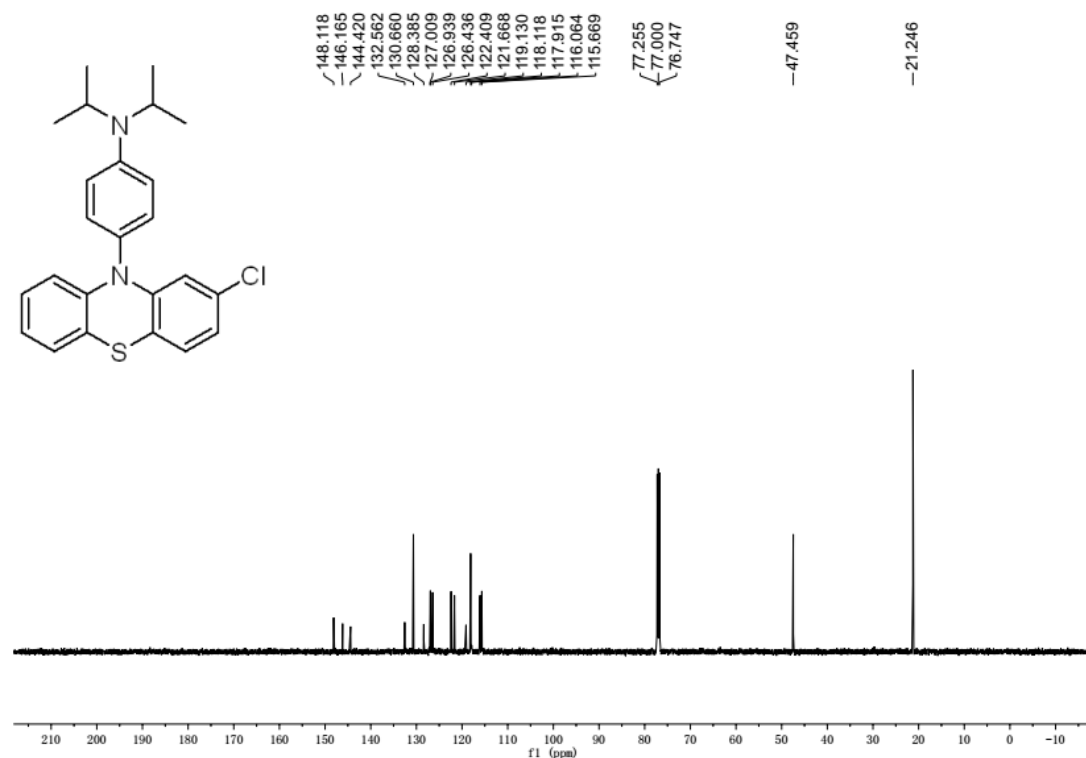

4-(2-Chloro-10H-phenothiazin-10-yl)-N-ethyl-N-methylaniline (3ga);

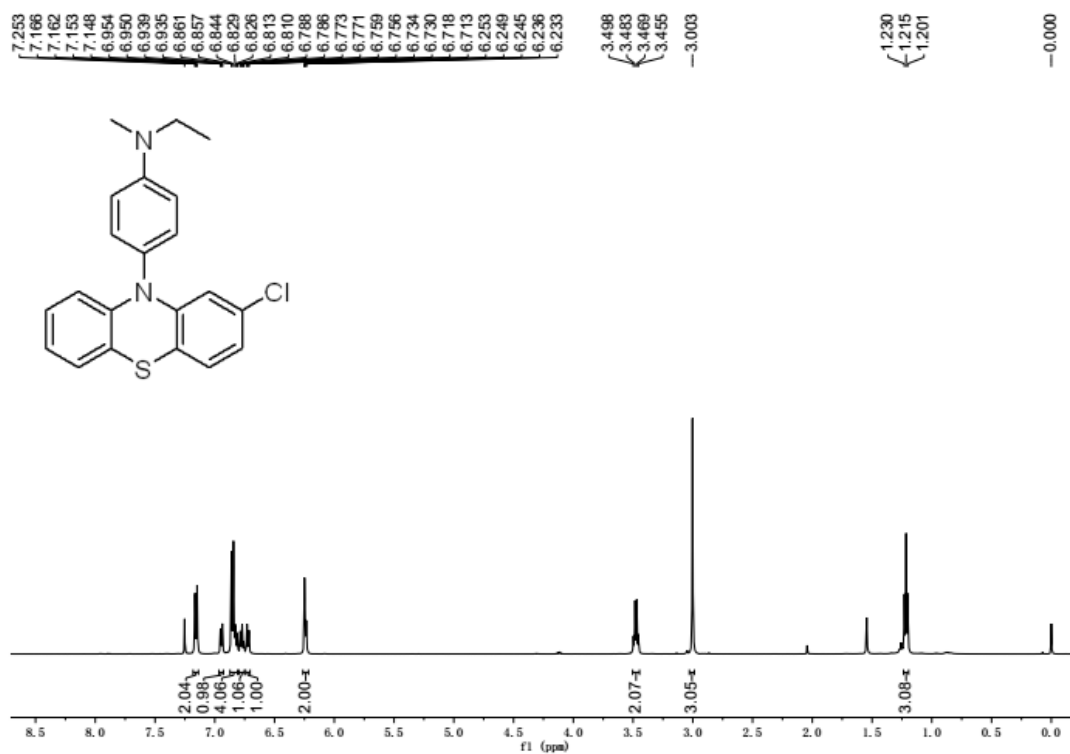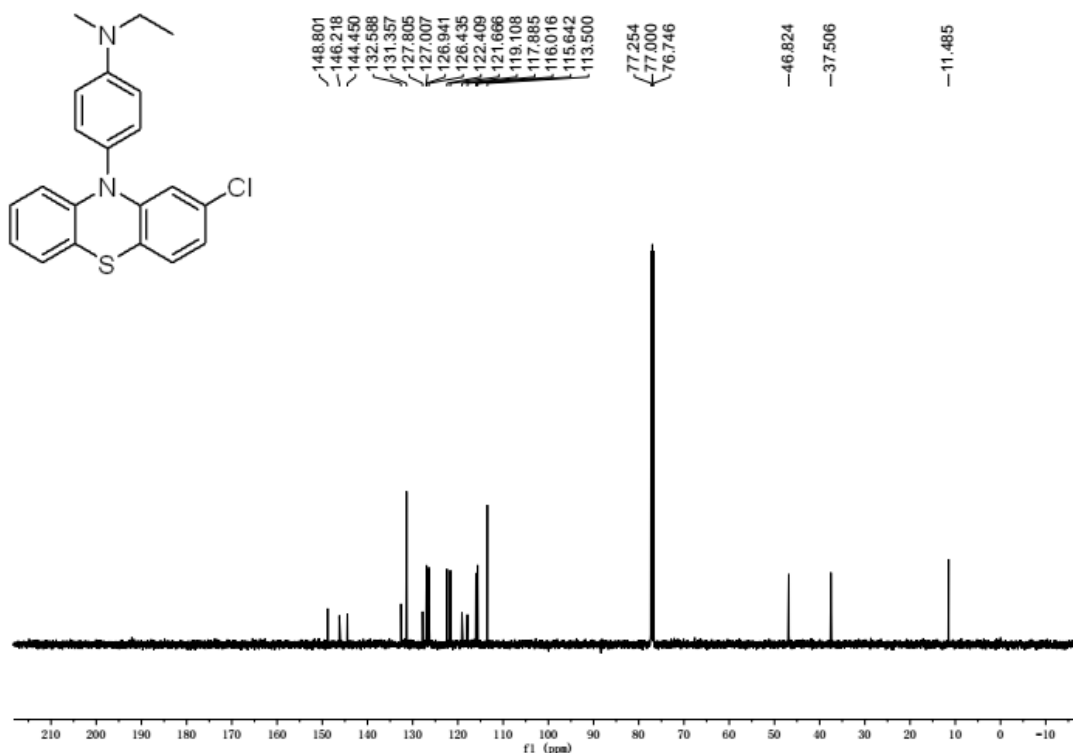

***N*-Benzyl-4-(2-chloro-10*H*-phenothiazin-10-yl)-*N*-methylaniline (3ha):**

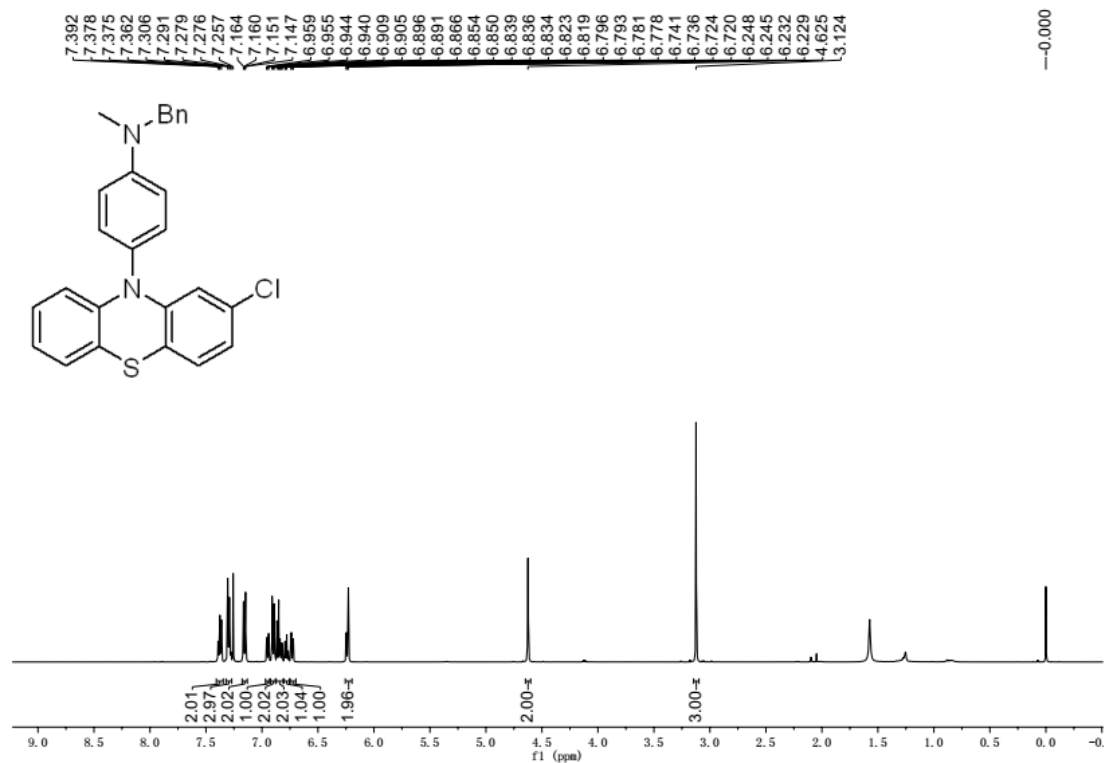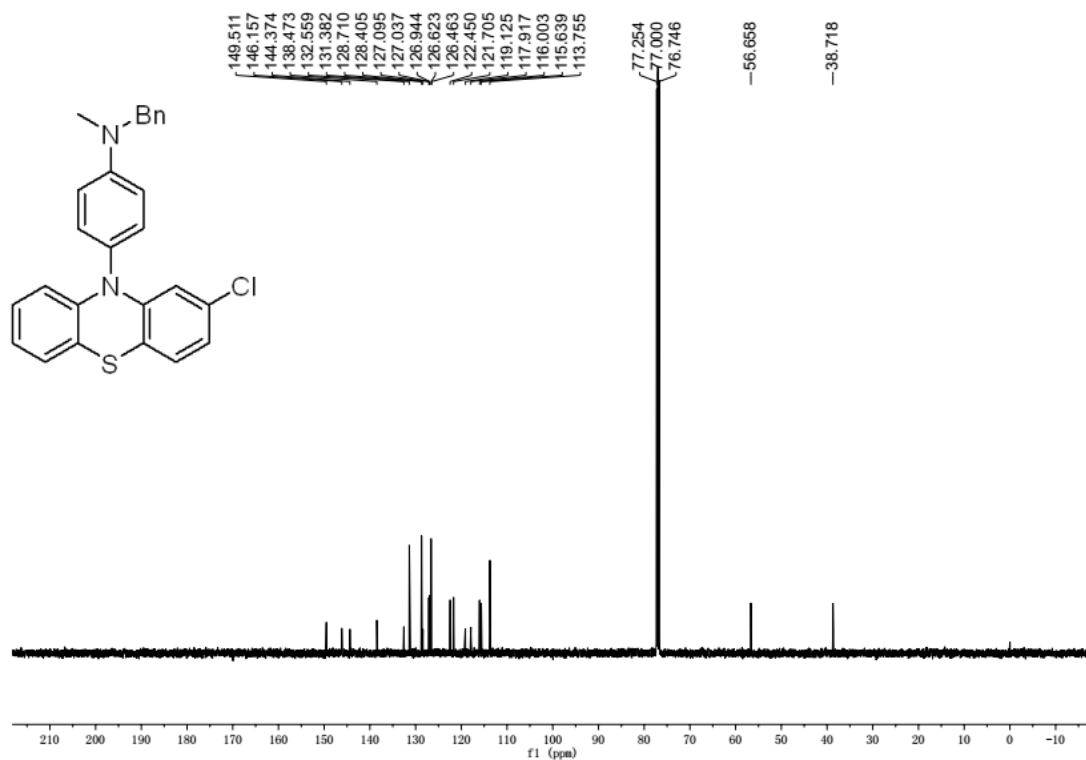

***N*-(4-(2-Chloro-10*H*-phenothiazin-10-yl)phenyl)-*N*-methylnaphthalen-2-amine**

**(3ia):**

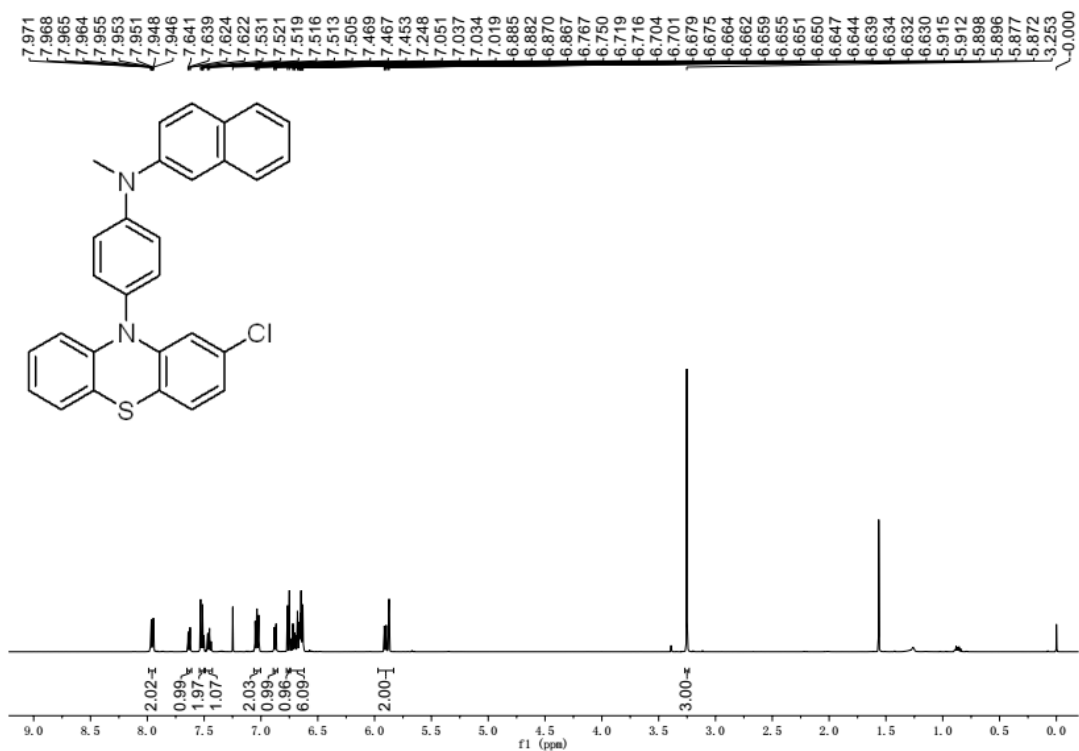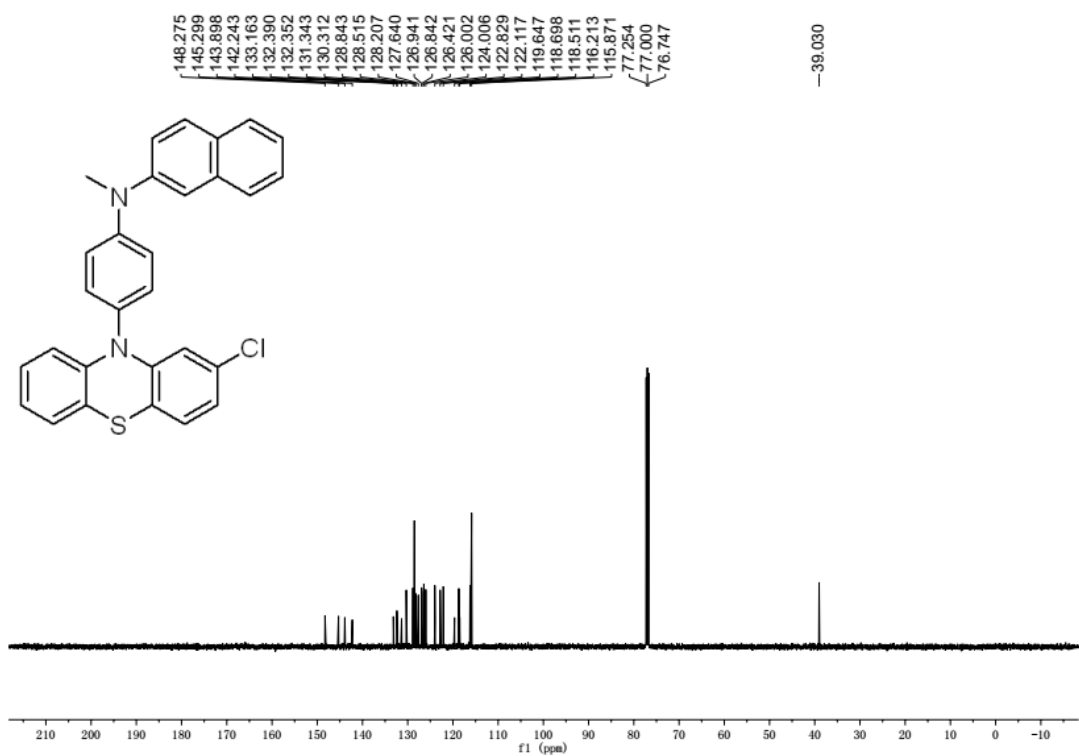

**2-Chloro-10-(4-(pyrrolidin-1-yl)phenyl)-10H-phenothiazine (3ja):**

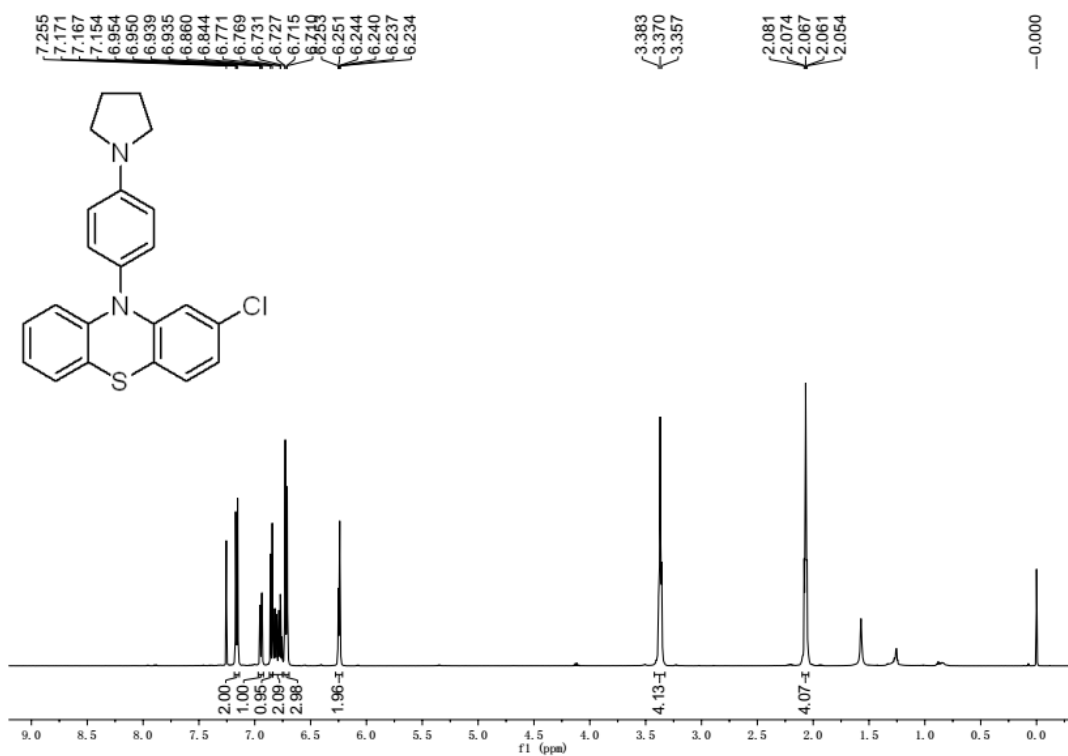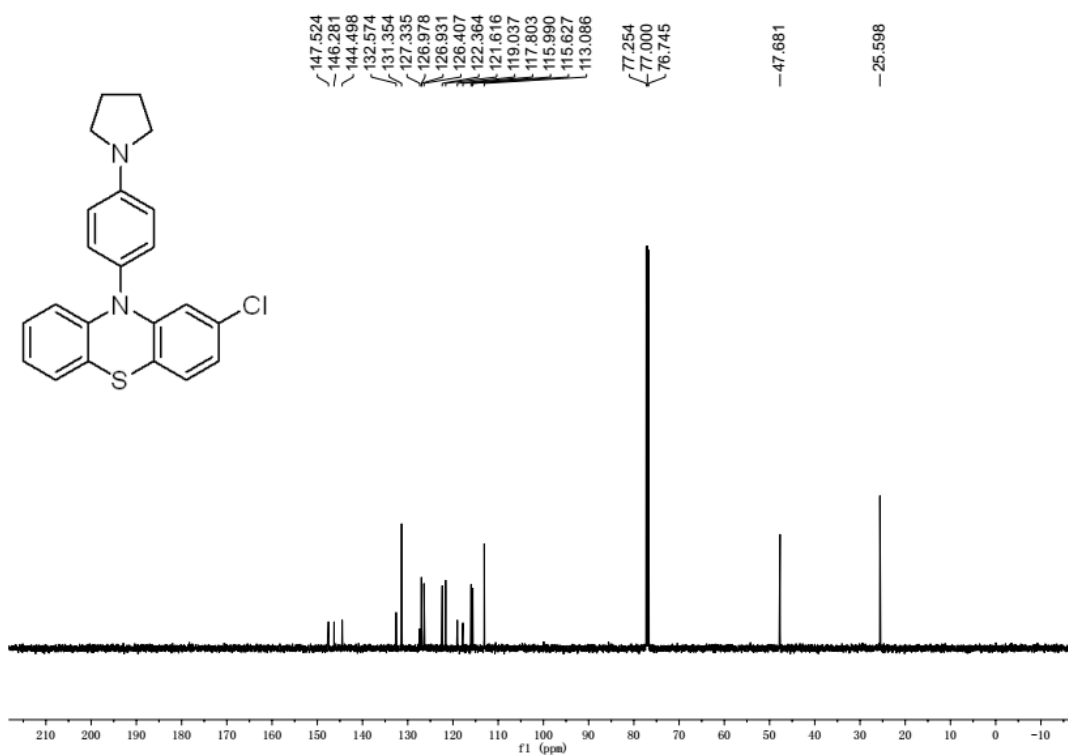

**2-Chloro-10-(4-(piperidin-1-yl)phenyl)-10H-phenothiazine (3ka):**

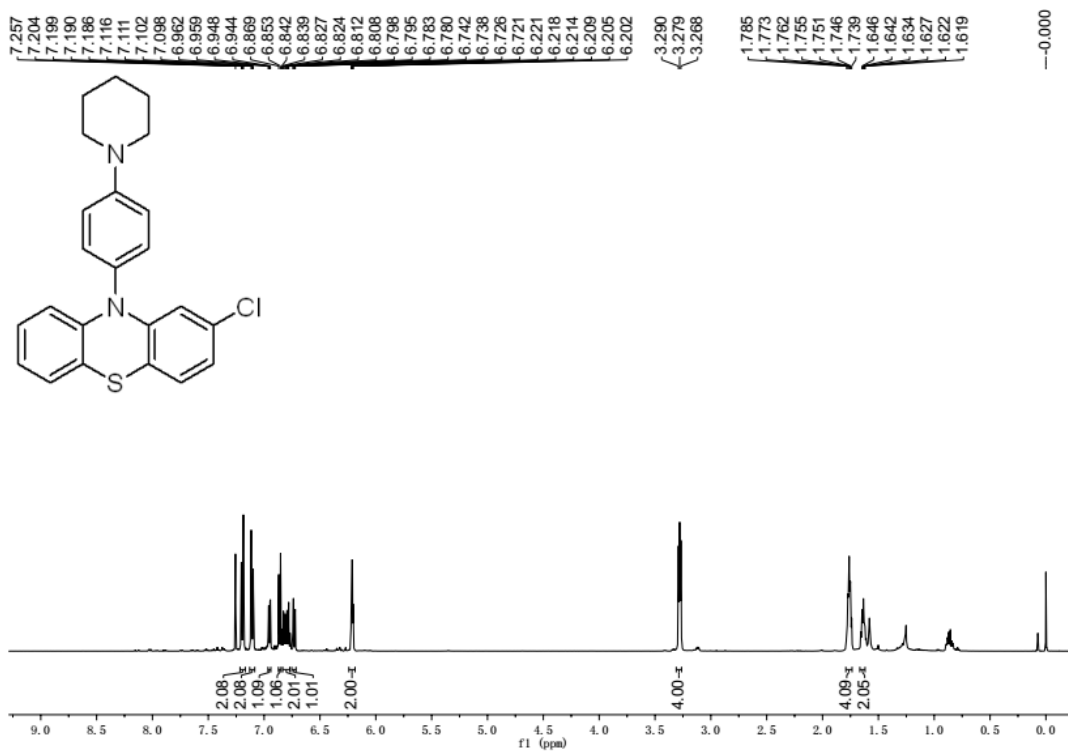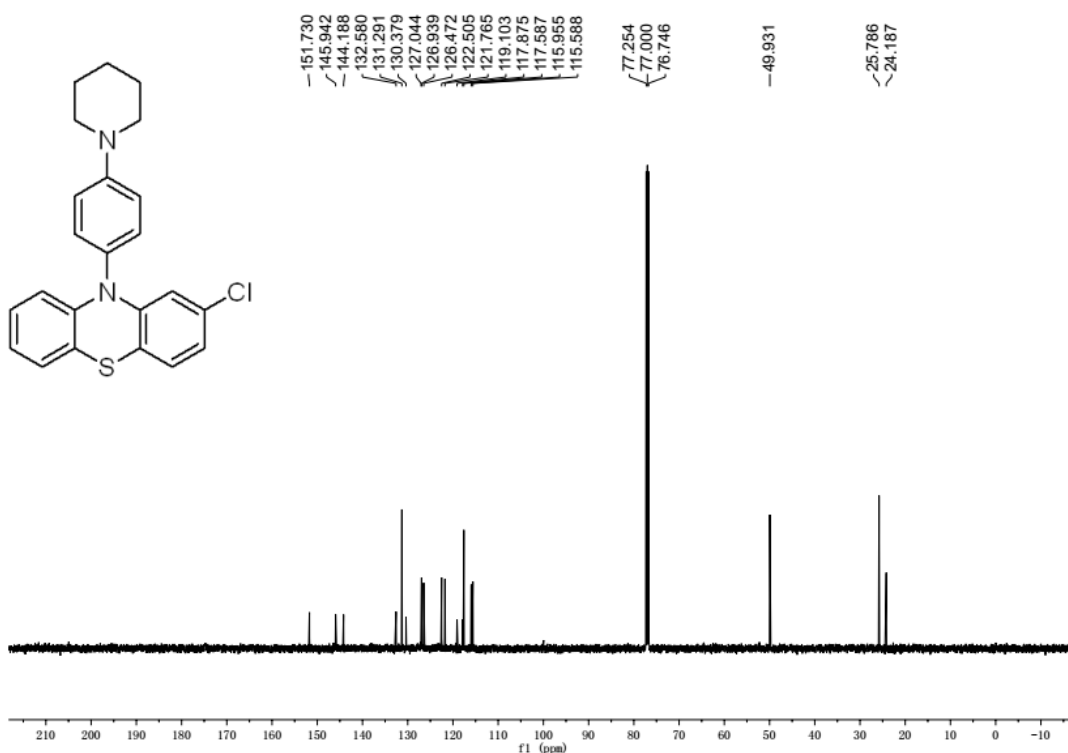

4-(4-(2-Chloro-10H-phenothiazin-10-yl)phenyl)morpholine (31a):

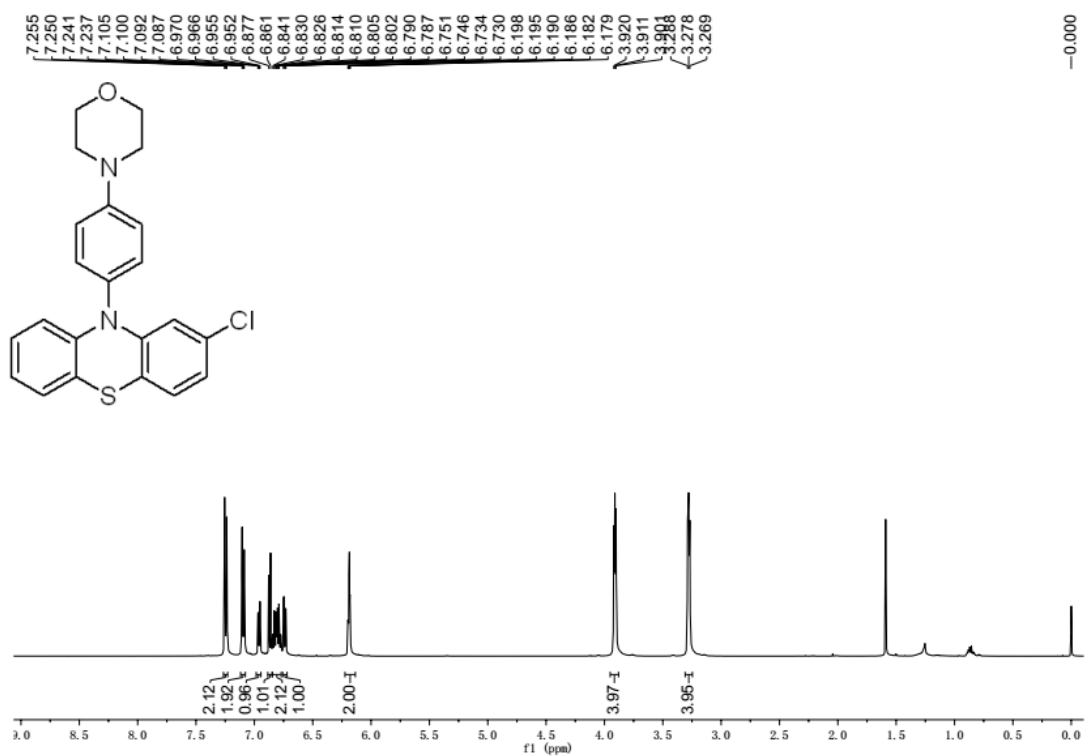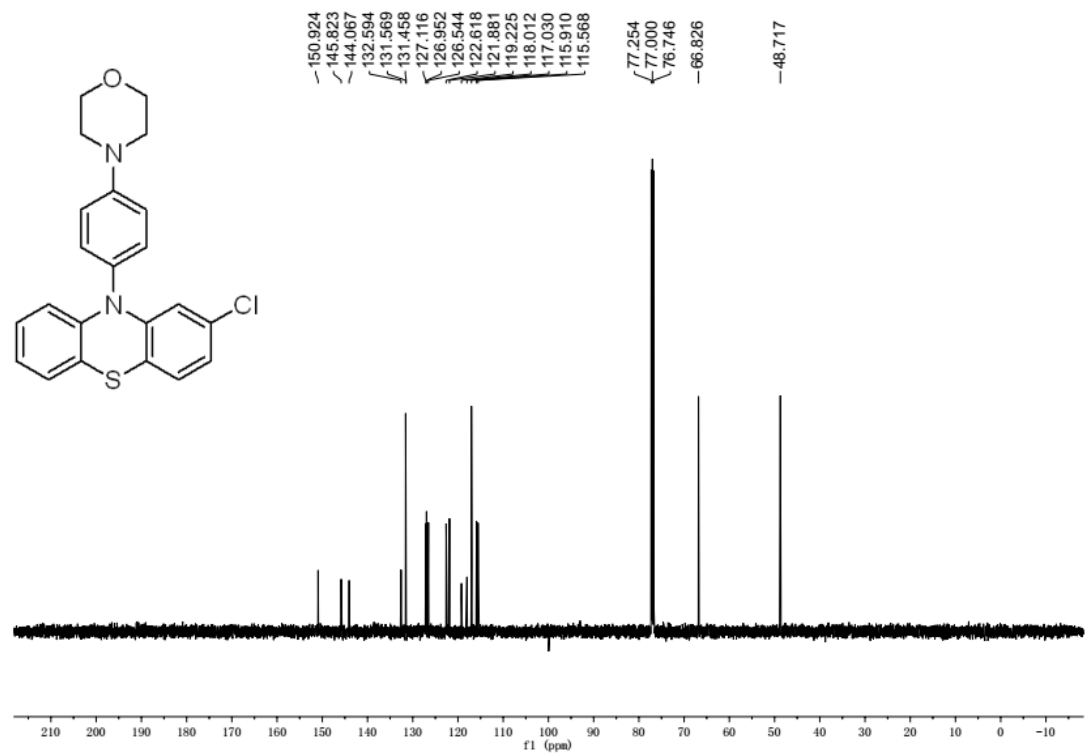



# 2-Chloro-10-(1-methyl-1,2,3,4-tetrahydroquinolin-6-yl)-10H-phenothiazine

(3ma):

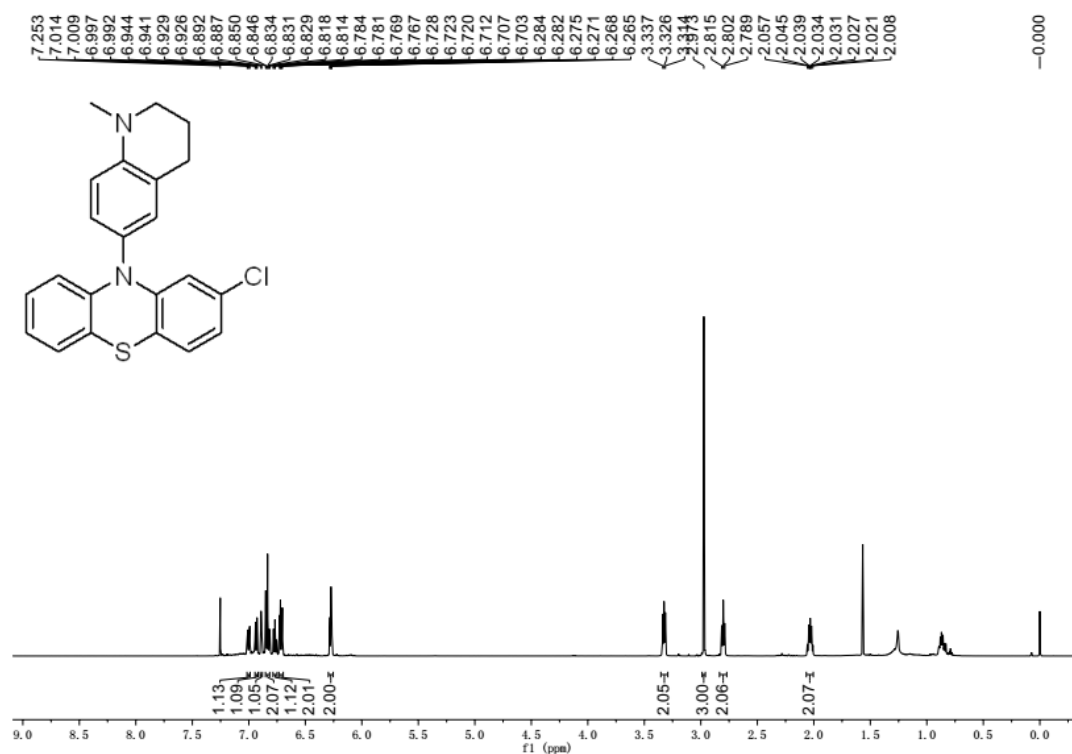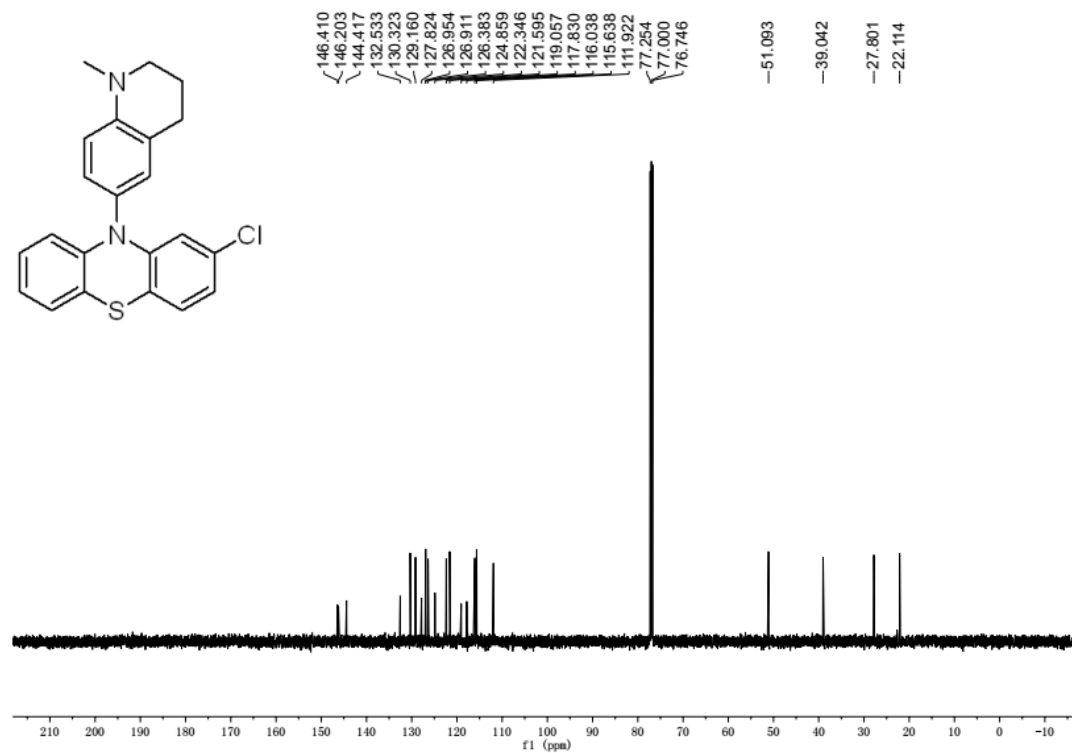

# 2-Chloro-10-(2,3,6,7-tetrahydro-1*H*,5*H*-pyrido[3,2-*i*]quinolin-9-yl)-10*H*-

## phenothiazine (3na):

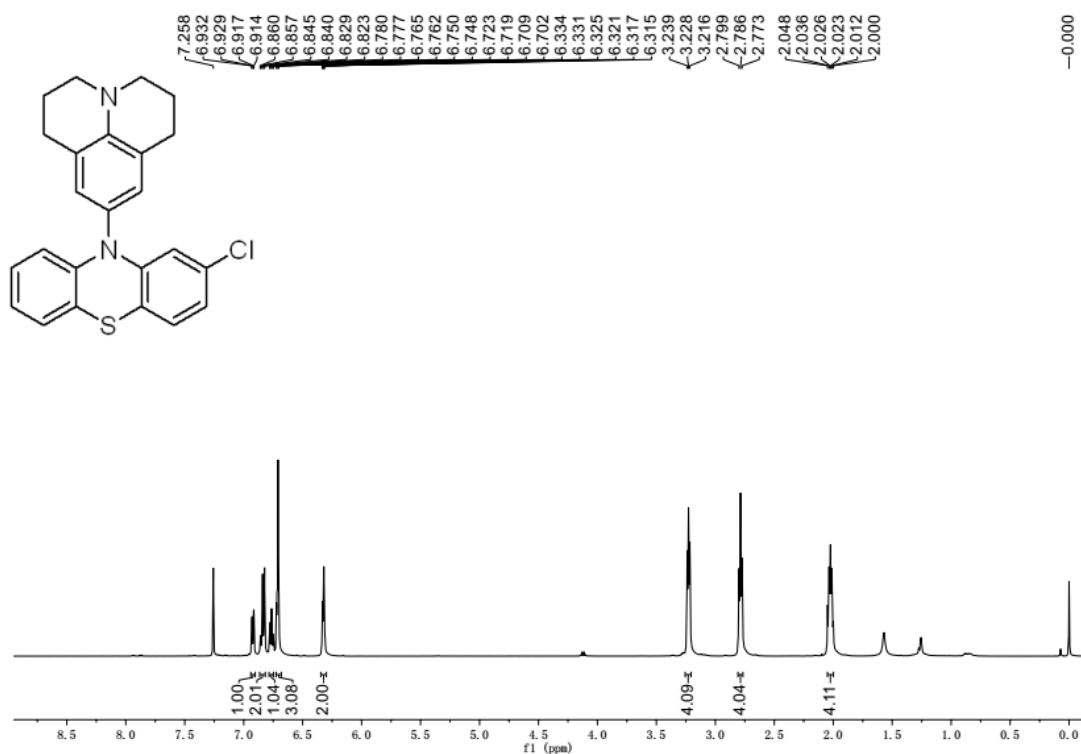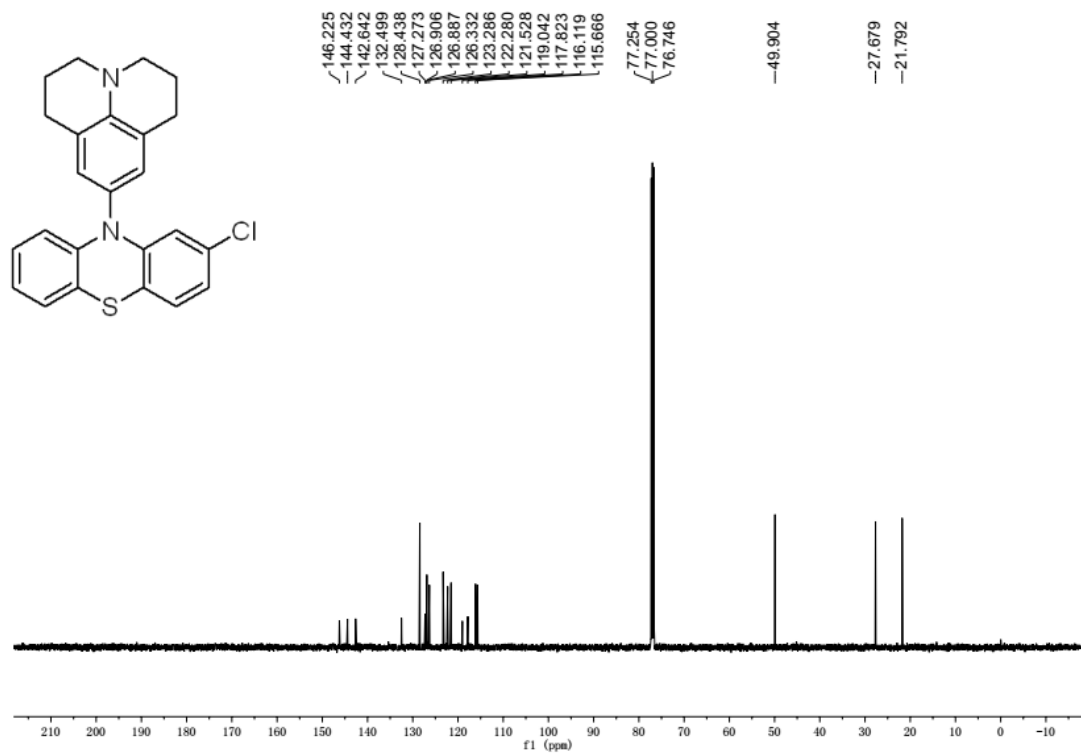

**4-(2-Chloro-10H-phenothiazin-10-yl)-N,N-diethylnaphthalen-1-amine (30a):**

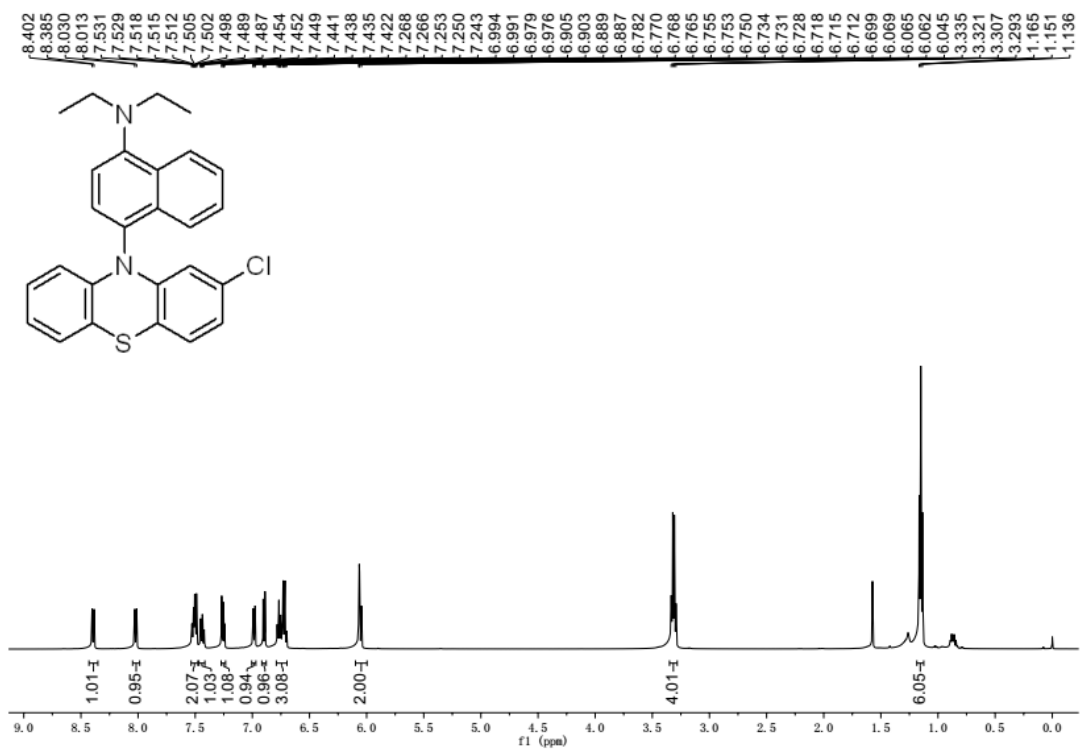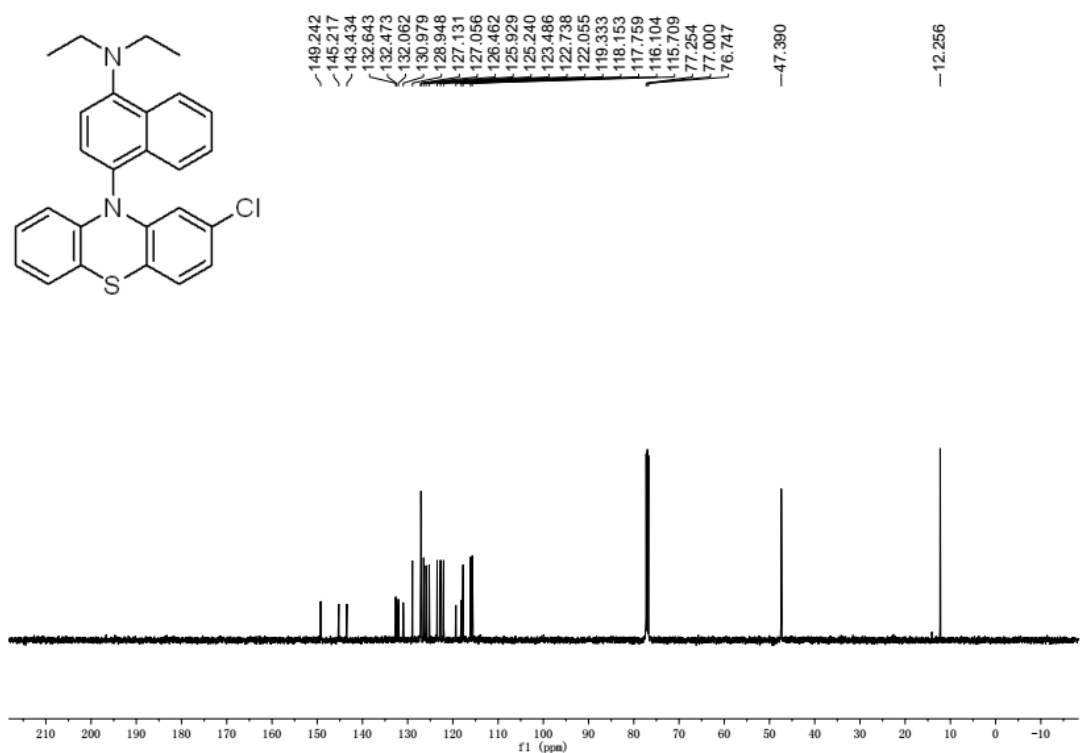

**4-(2-Chloro-10H-phenothiazin-10-yl)-3,5-dimethoxyaniline (3pa) :**

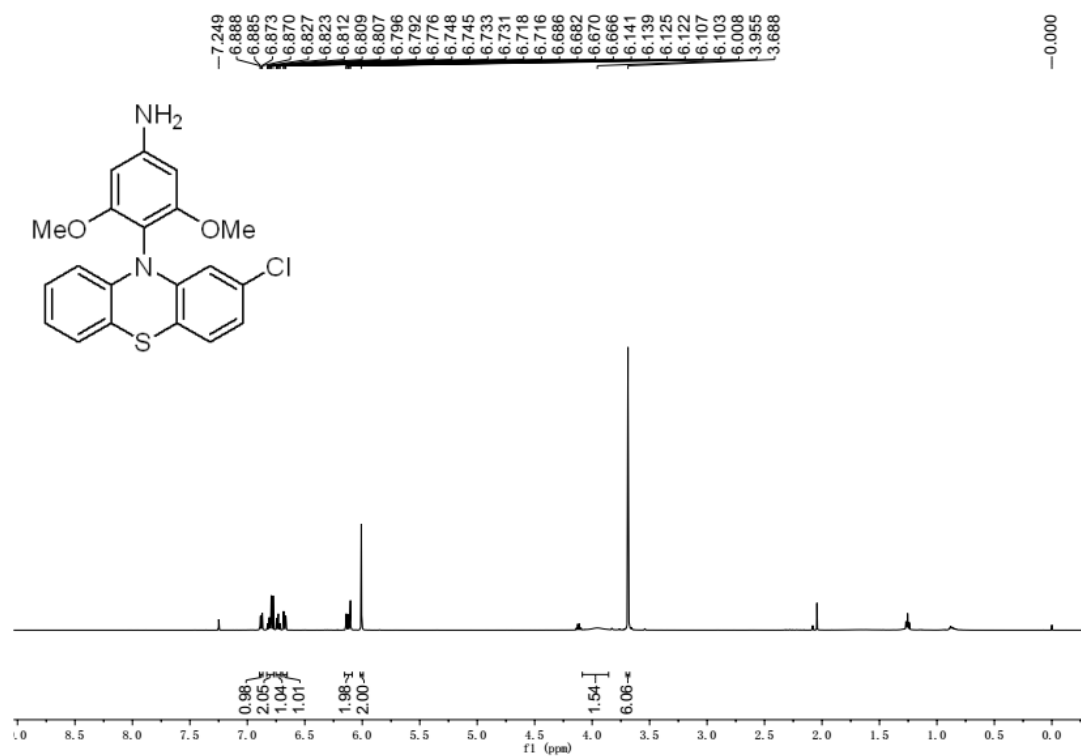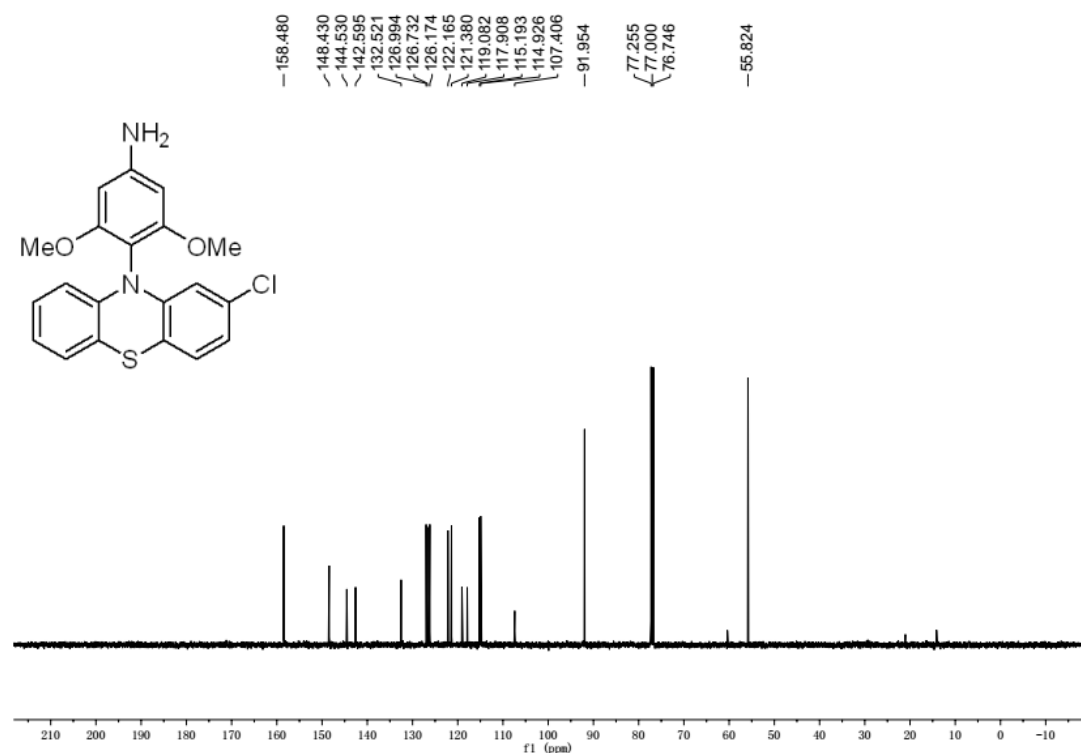

**4-(2-Chloro-10H-phenothiazin-10-yl)-N-ethyl-2-methylaniline (3qa):**

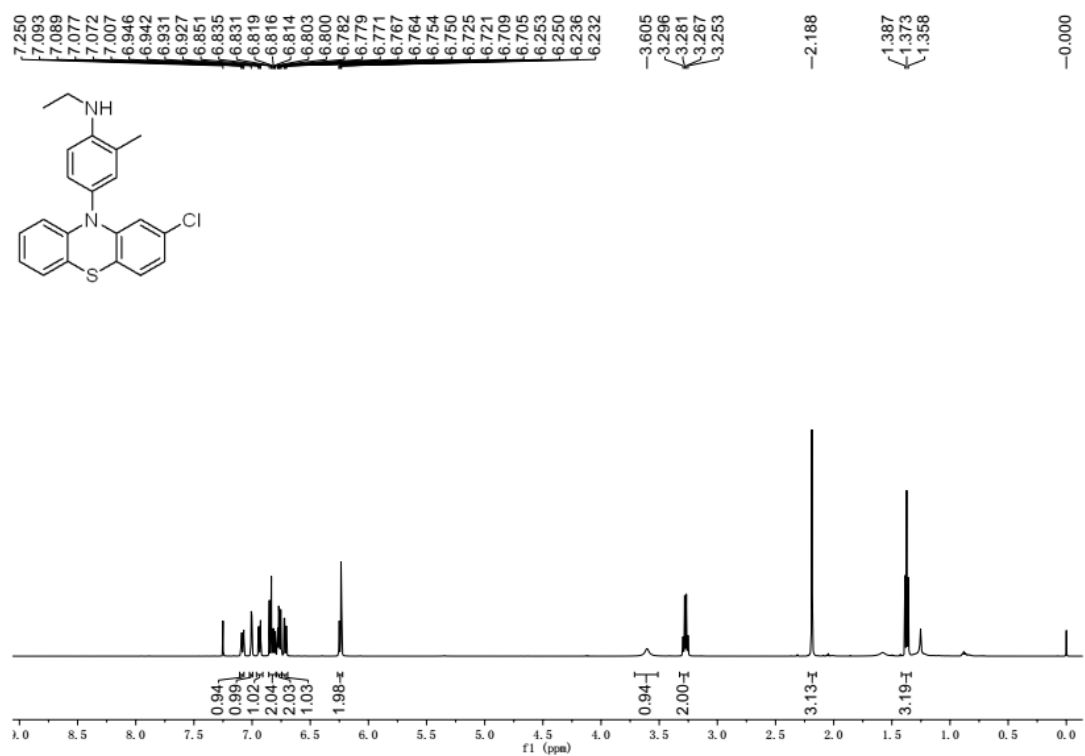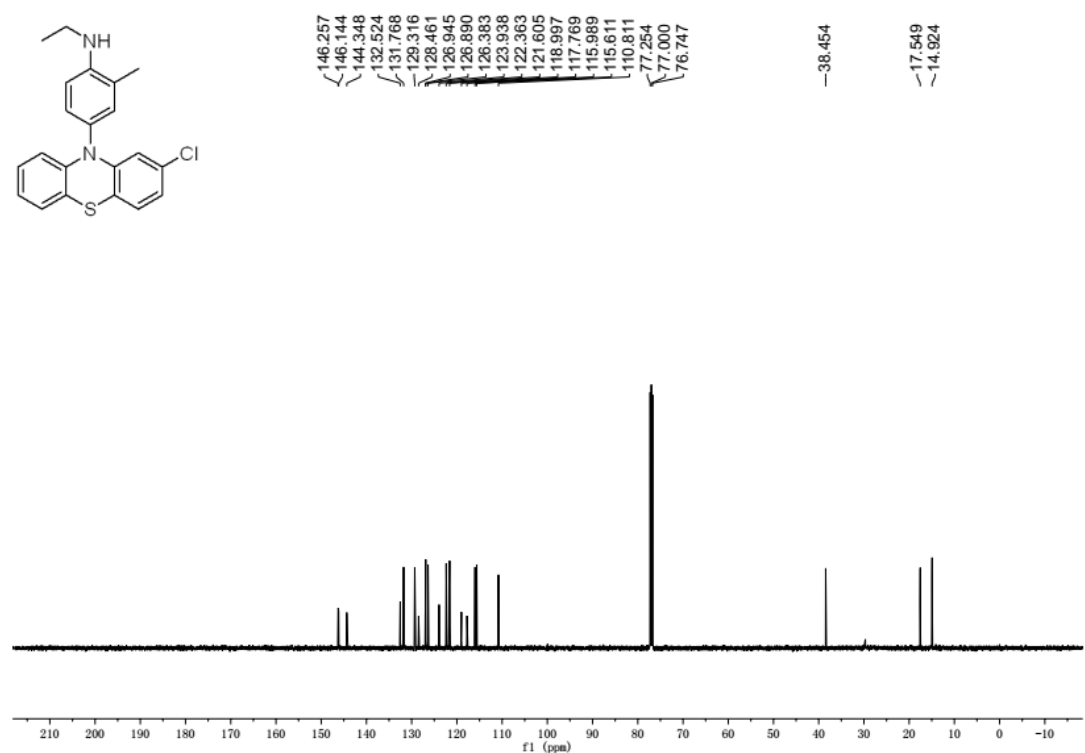

**4-(2-Chloro-10H-phenothiazin-10-yl)-N-ethyl-2-fluoroaniline (3ra):**

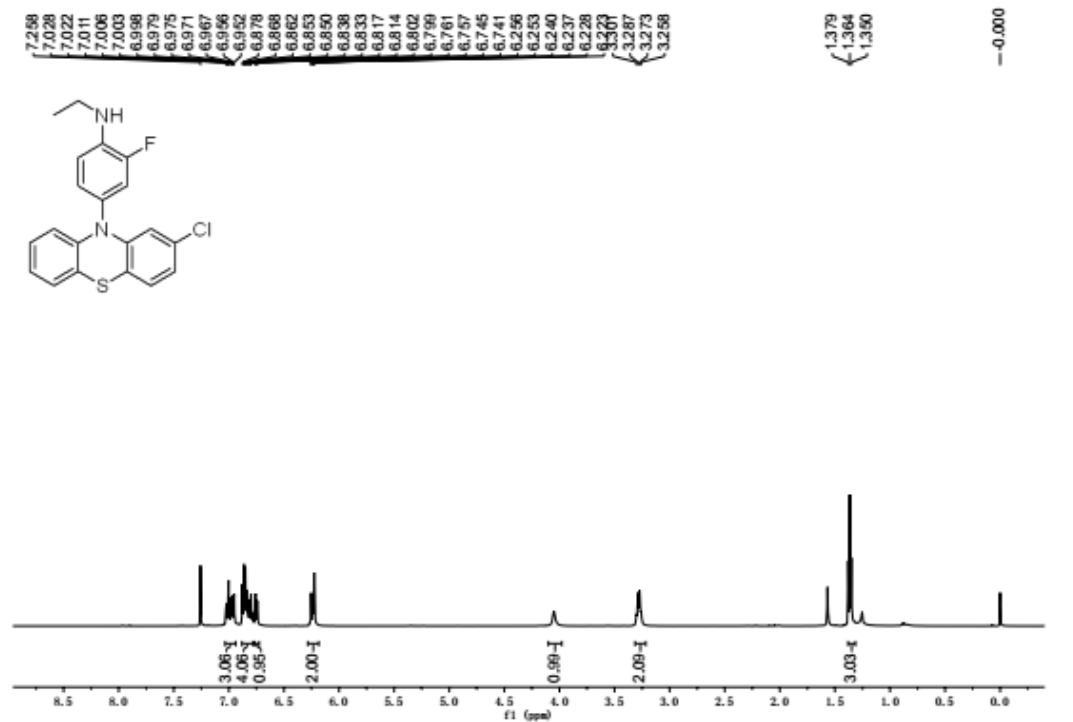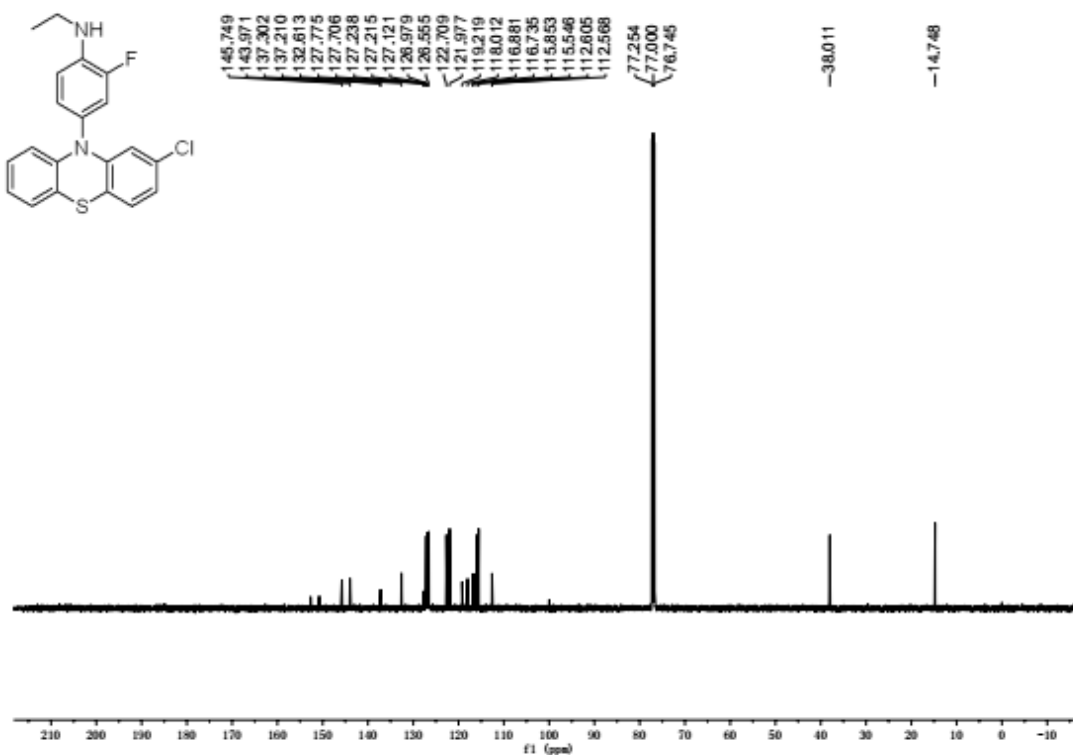

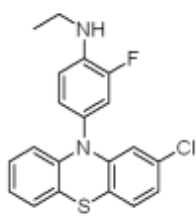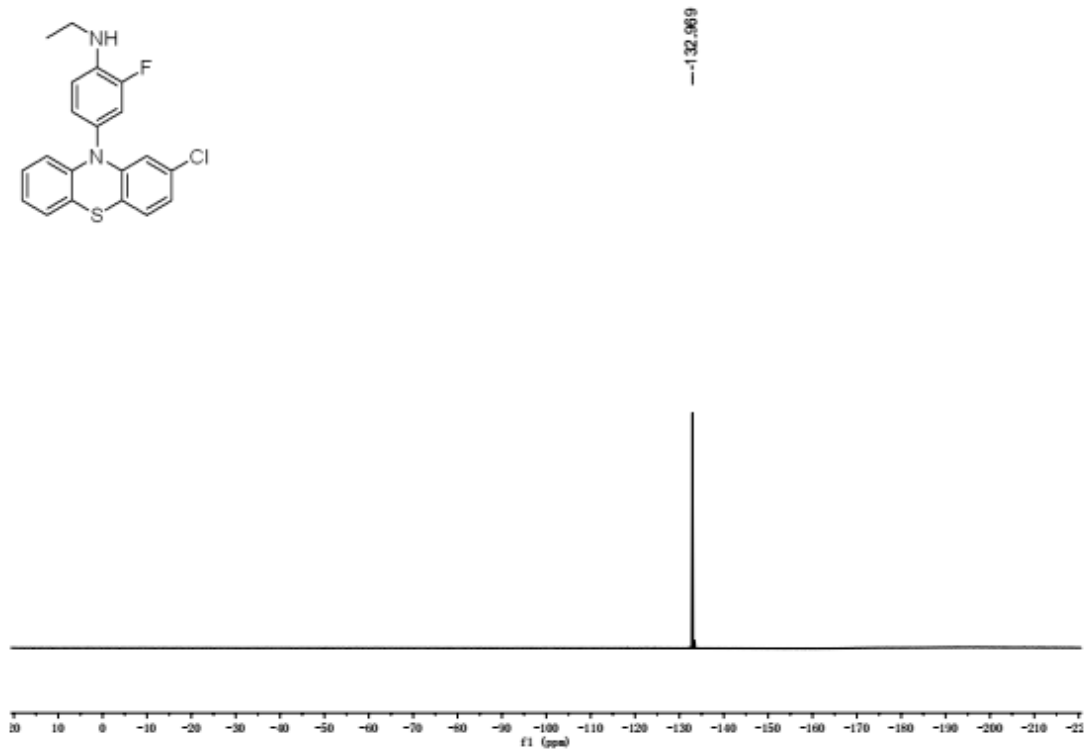

**4-(2-Chloro-10H-phenothiazin-10-yl)-N,N-diethyl-3,5-dimethoxyaniline (3sa):**

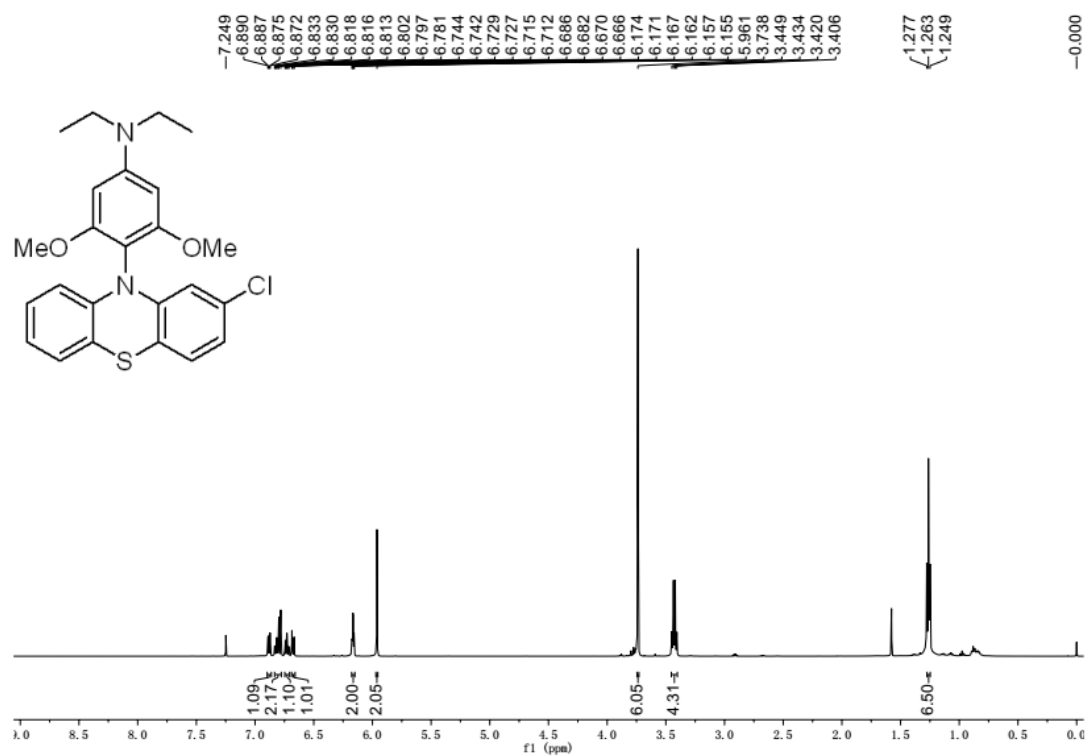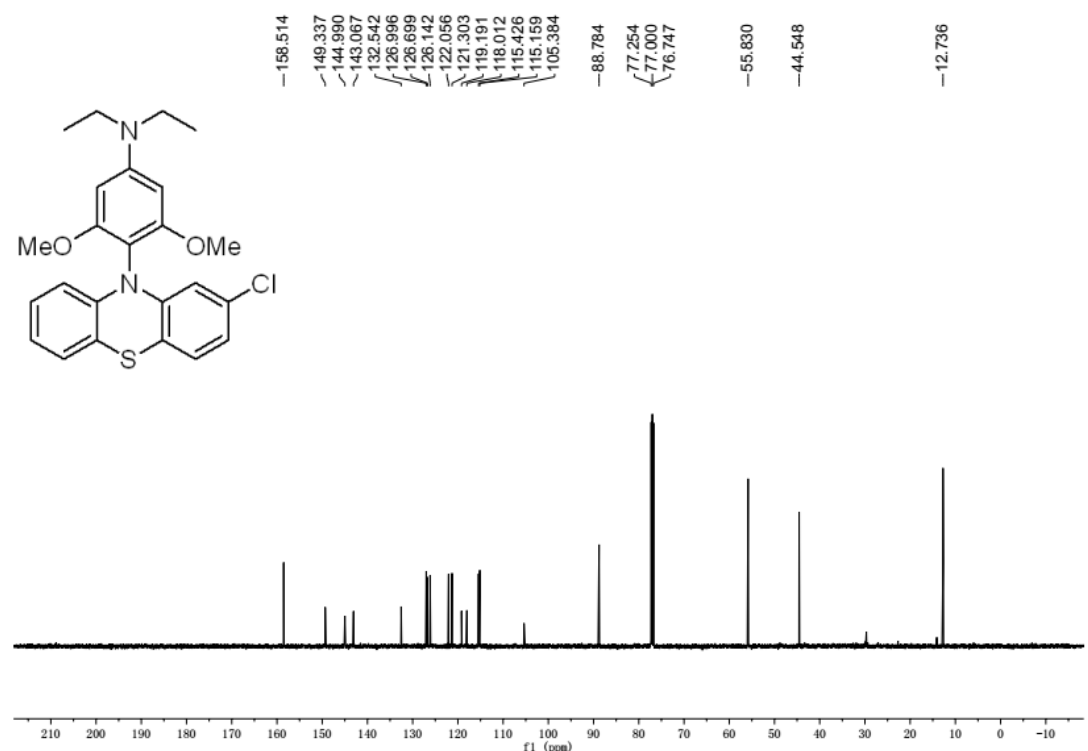



**4-(2-Chloro-10*H*-phenothiazin-10-yl)-*N,N*-diethyl-3,5-dimethylaniline (3ta):**

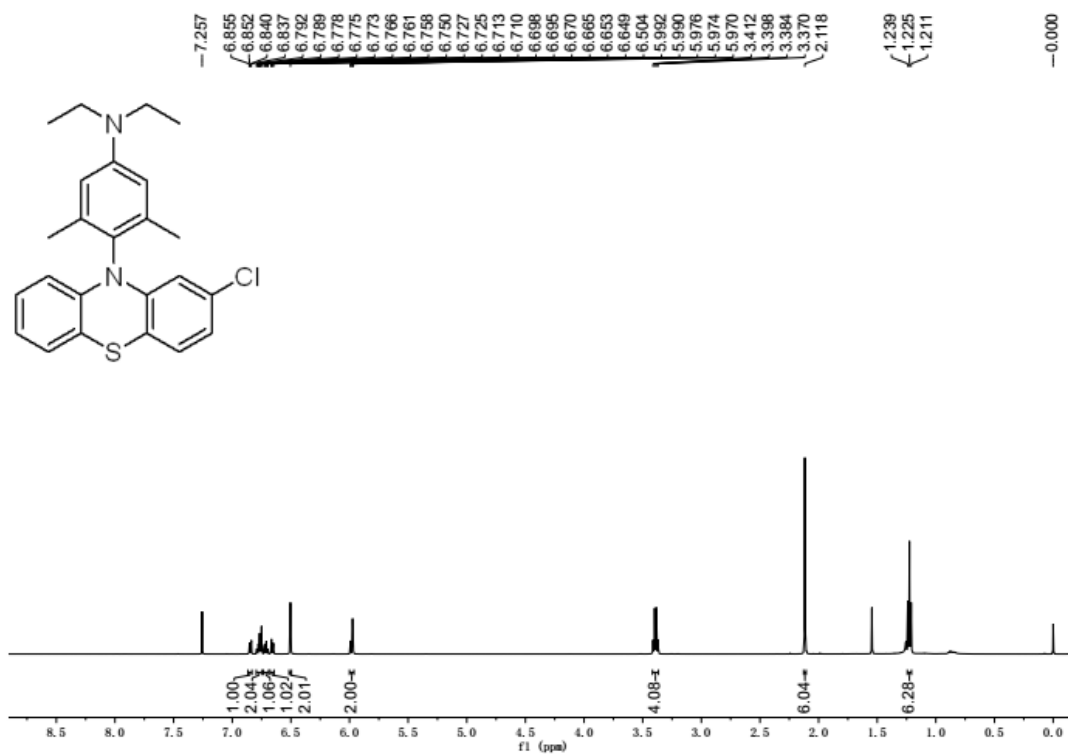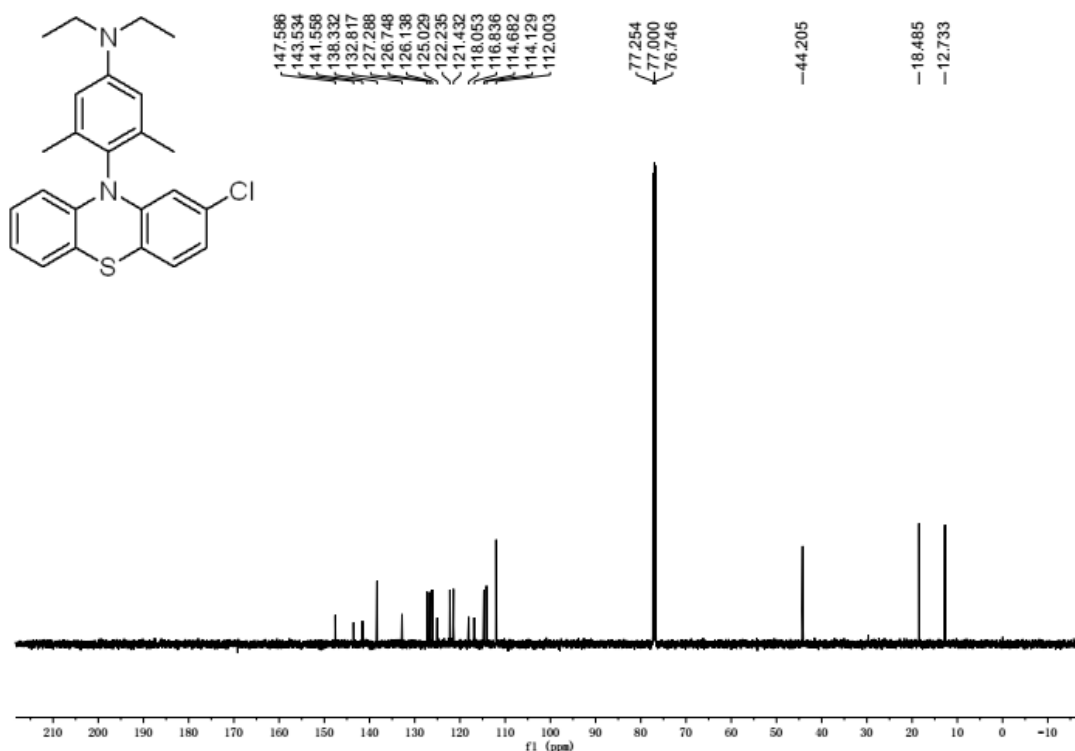

**4-(2-Chloro-10H-phenothiazin-10-yl)-N,N-diethyl-3-methylaniline (3ua):**

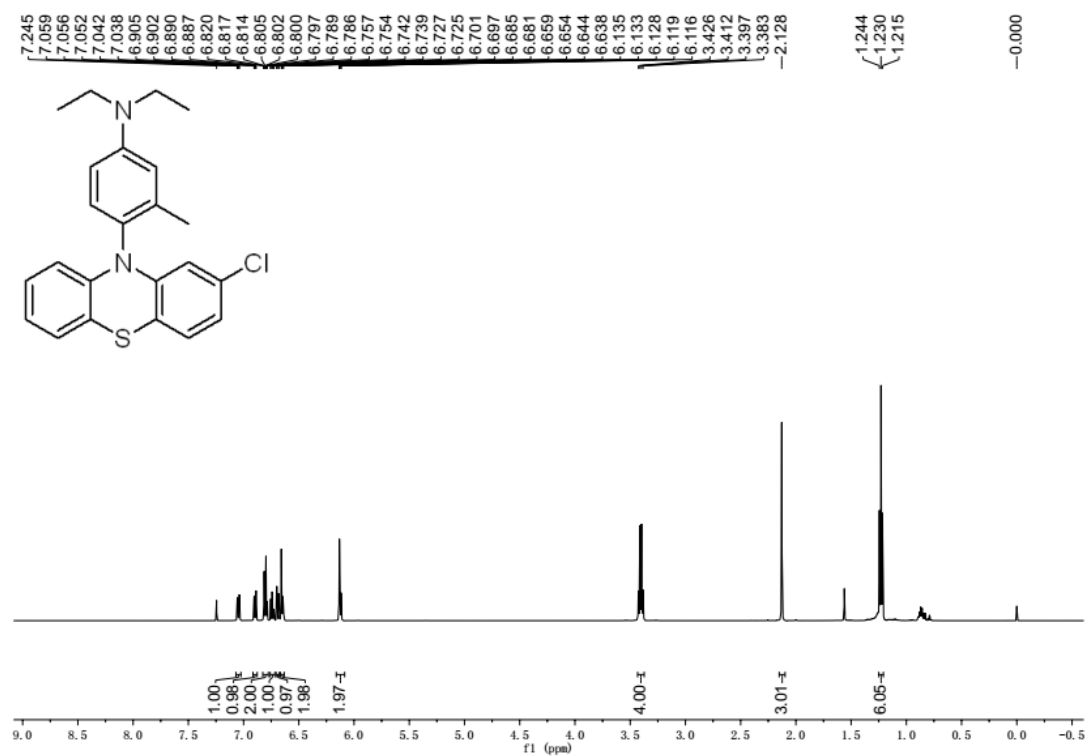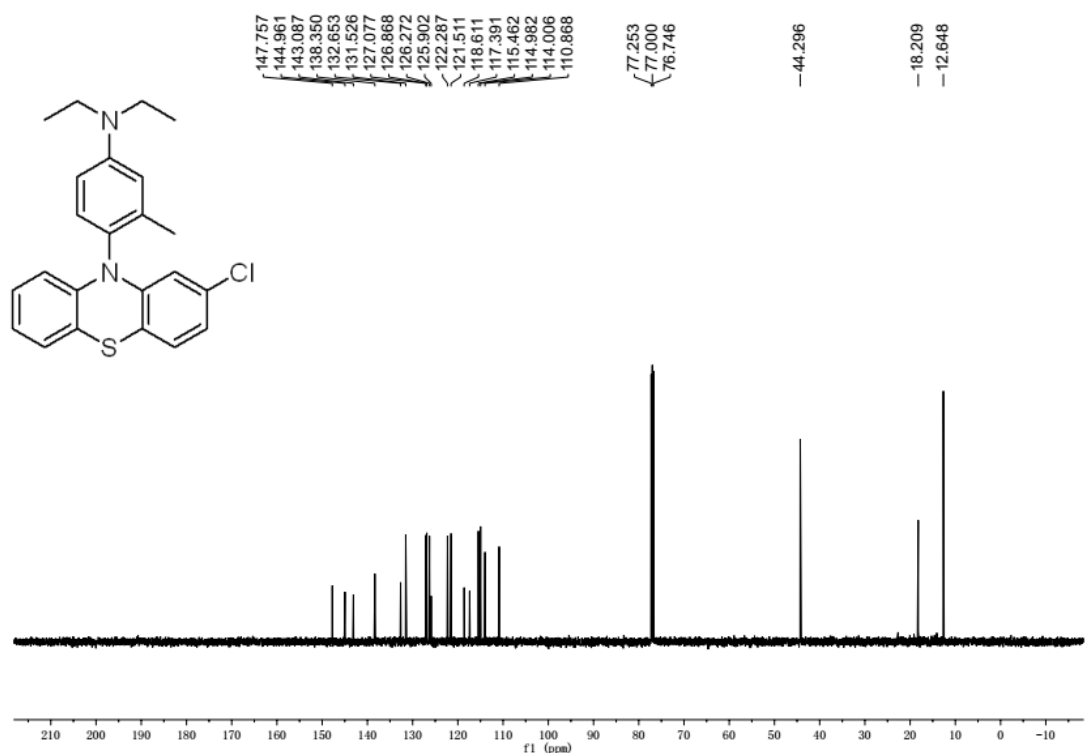

**4-(2-Chloro-10H-phenothiazin-10-yl)-N,N-diethyl-3-fluoroaniline (3va):**

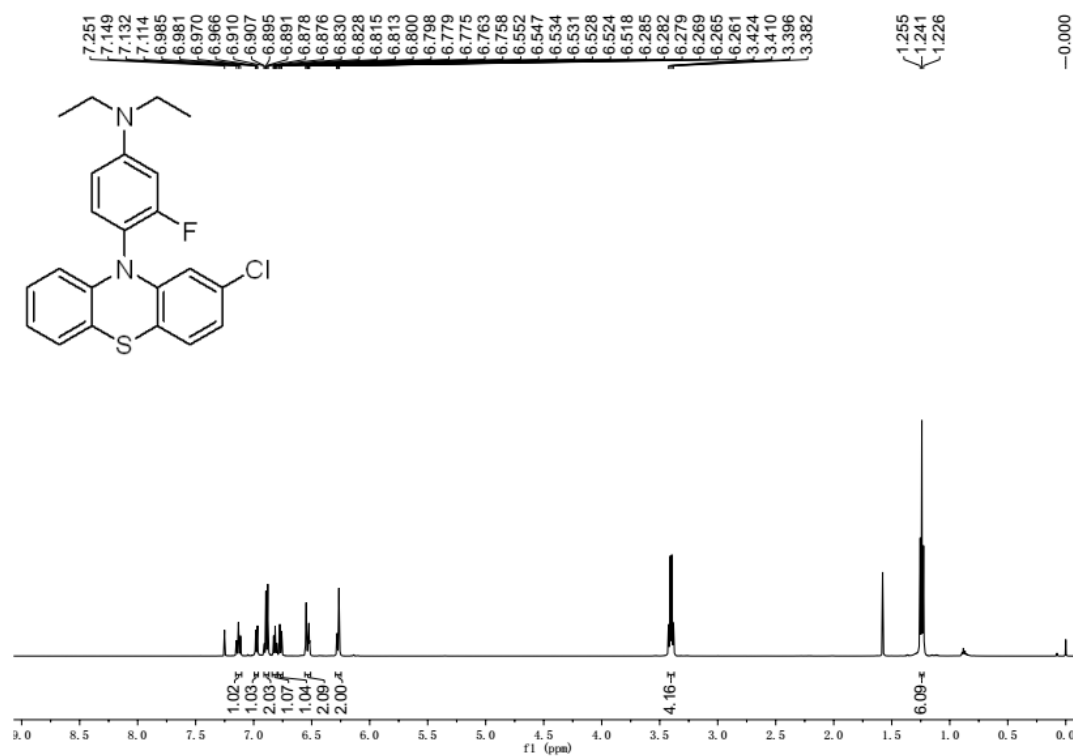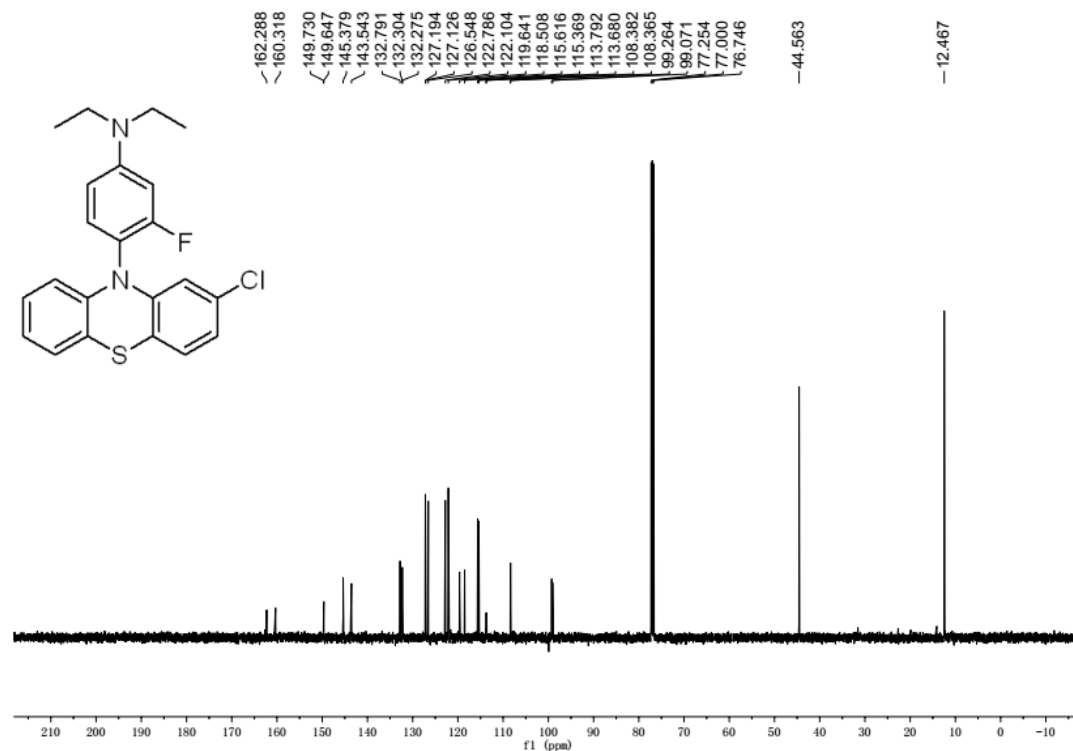

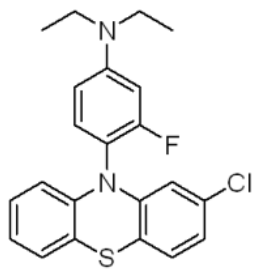

--110.254

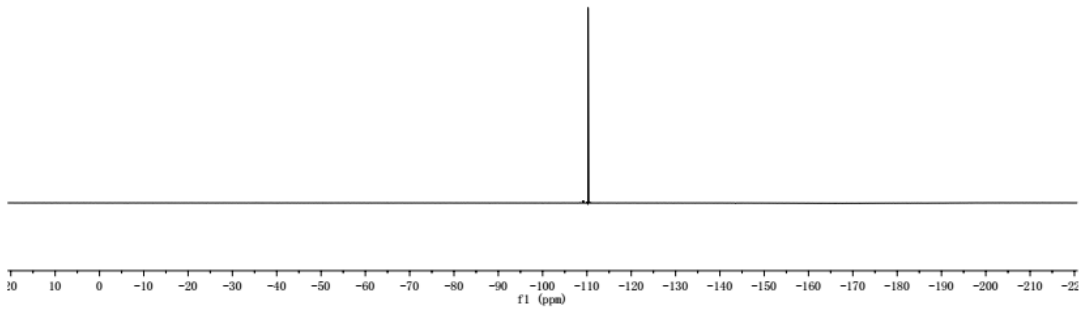

**4-(2-Chloro-10H-phenothiazin-10-yl)-N,N-diethyl-2-methylaniline (3wa):**

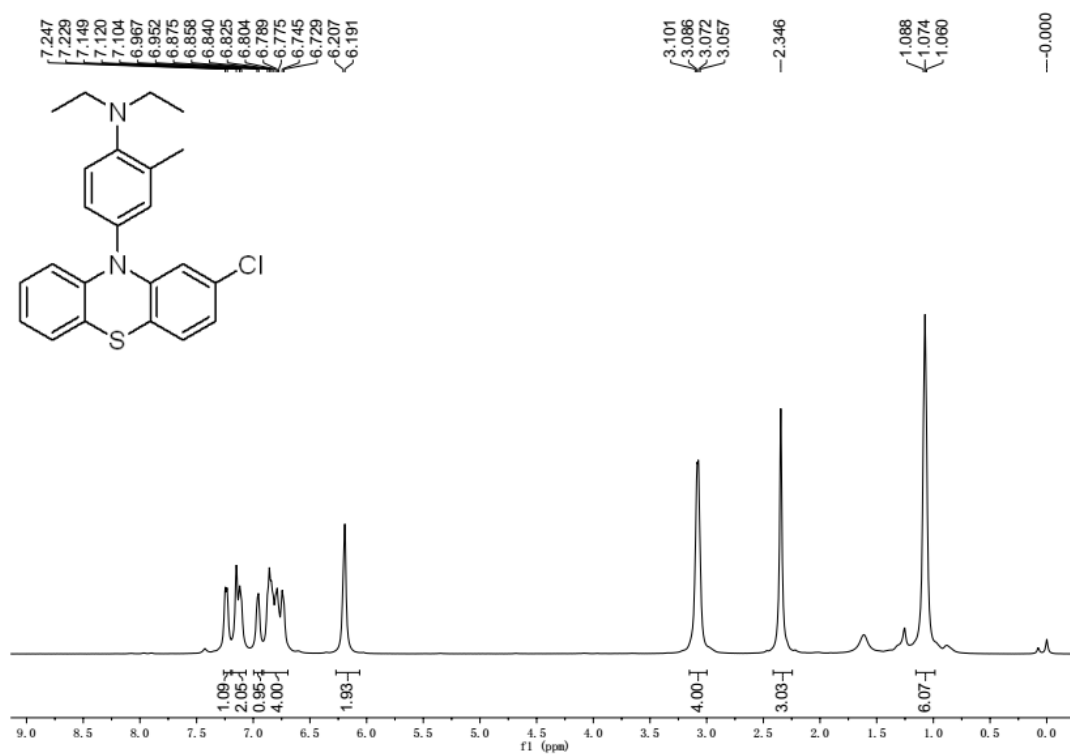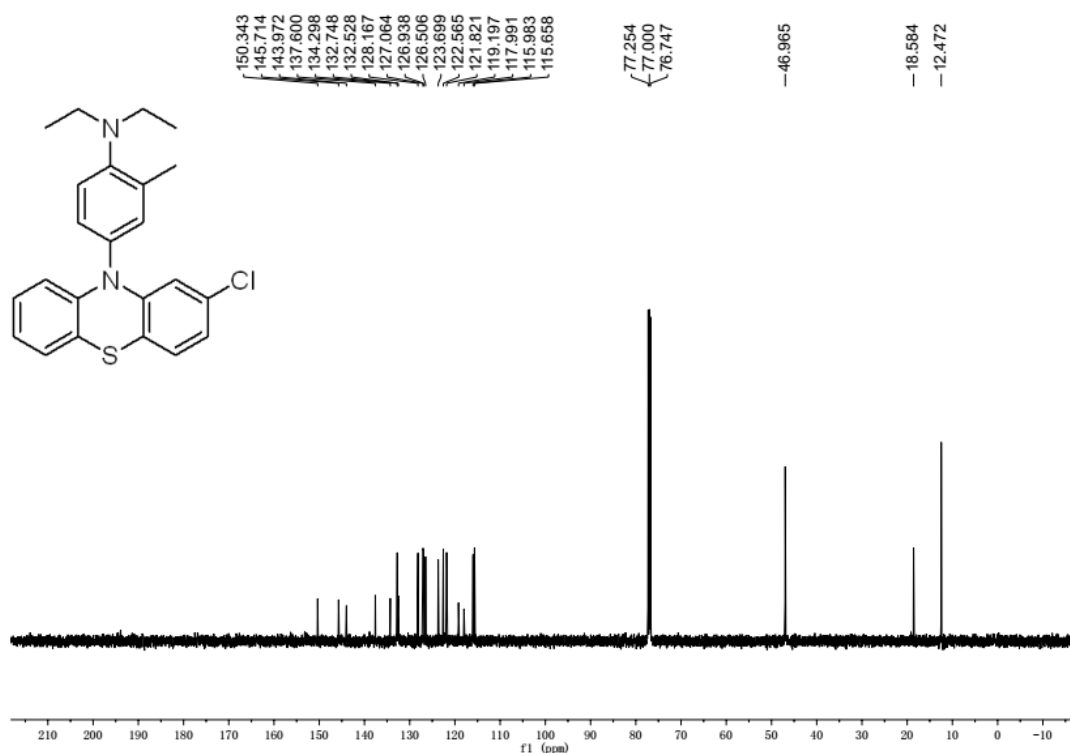

**2-(2-Chloro-10H-phenothiazin-10-yl)-5-(dimethylamino)phenol (3xa):**

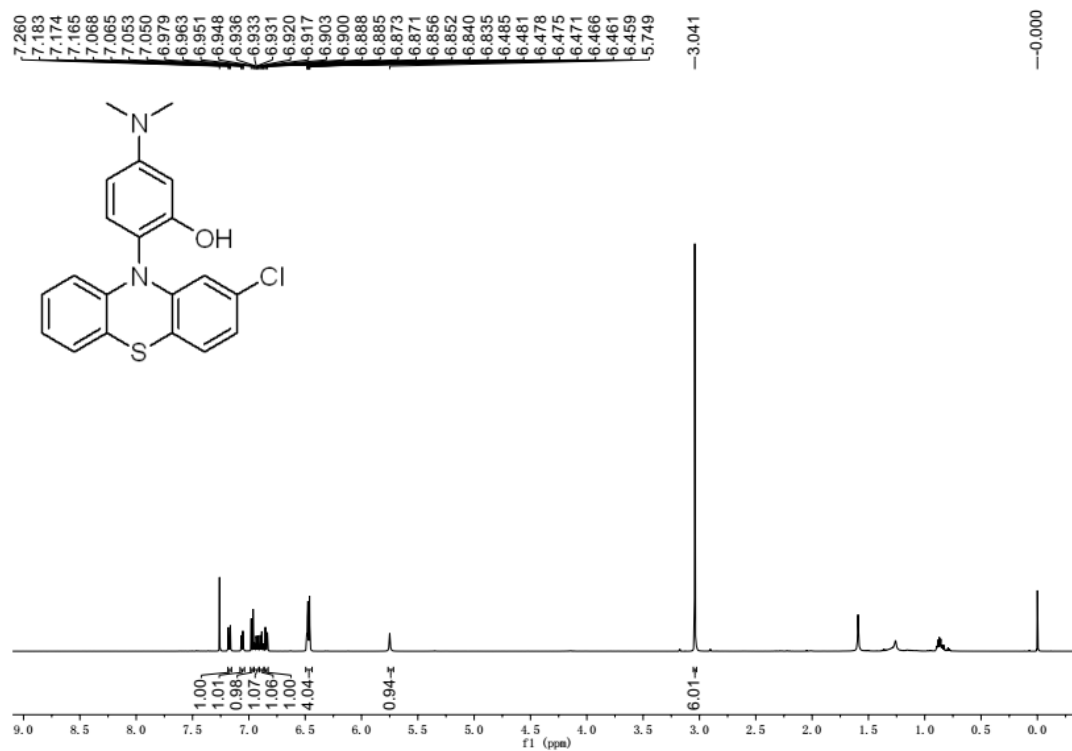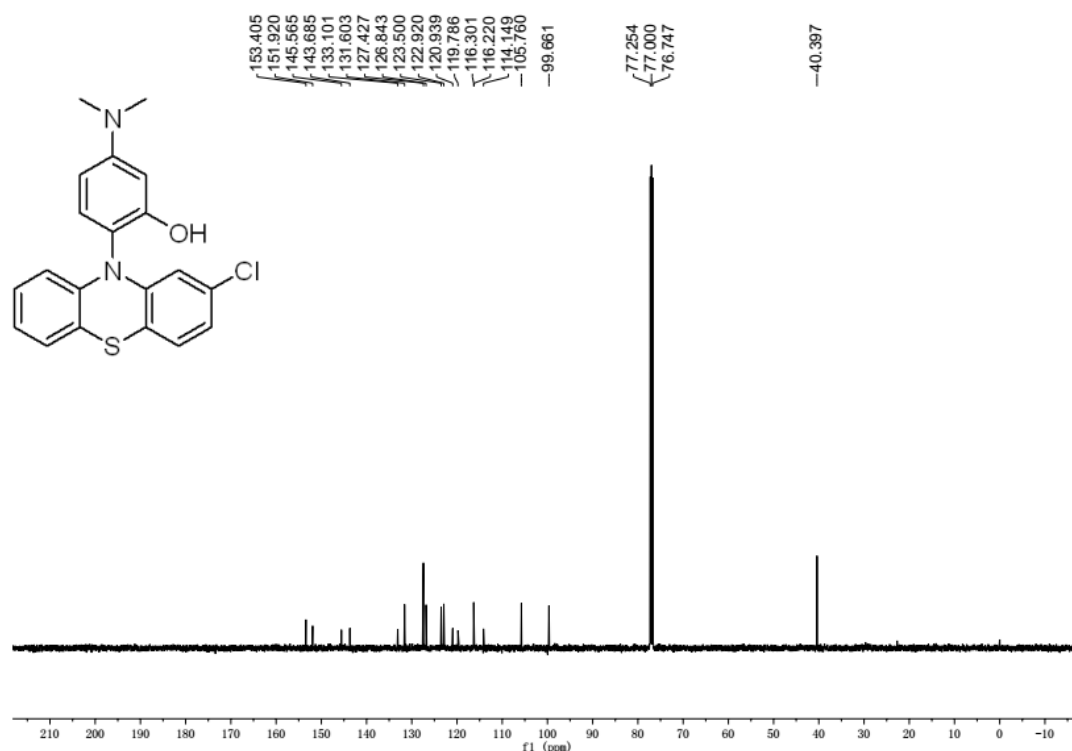

**2-(2-Chloro-10*H*-phenothiazin-10-yl)-*N,N*,4-trimethylaniline (3ya):**

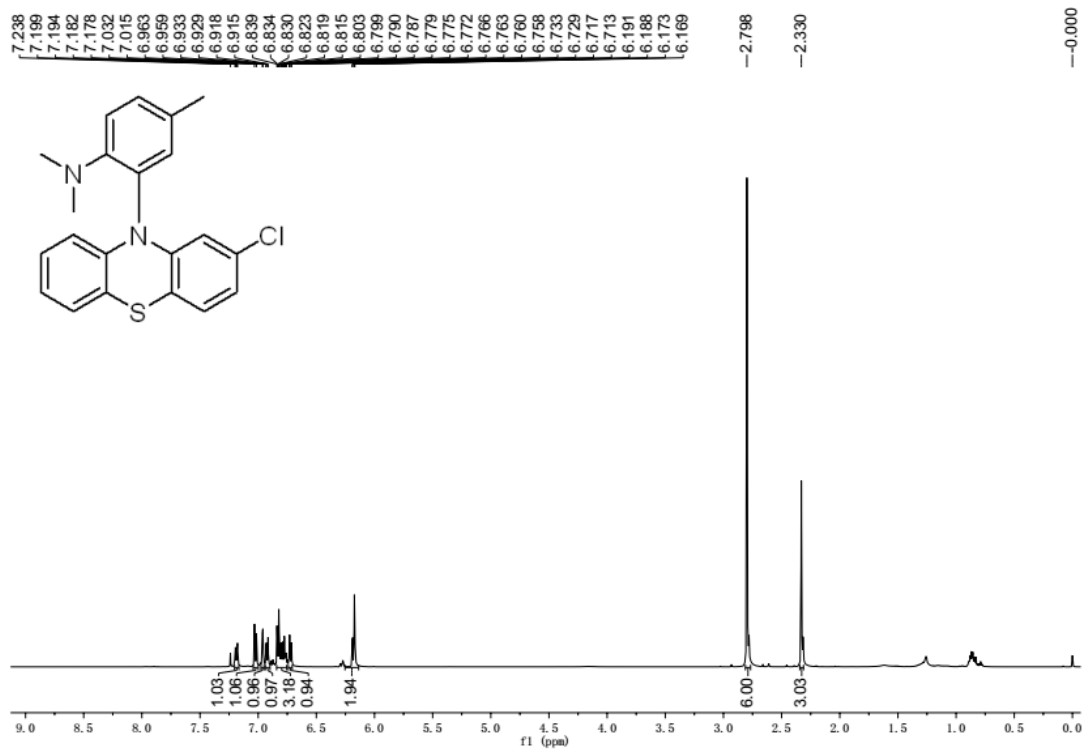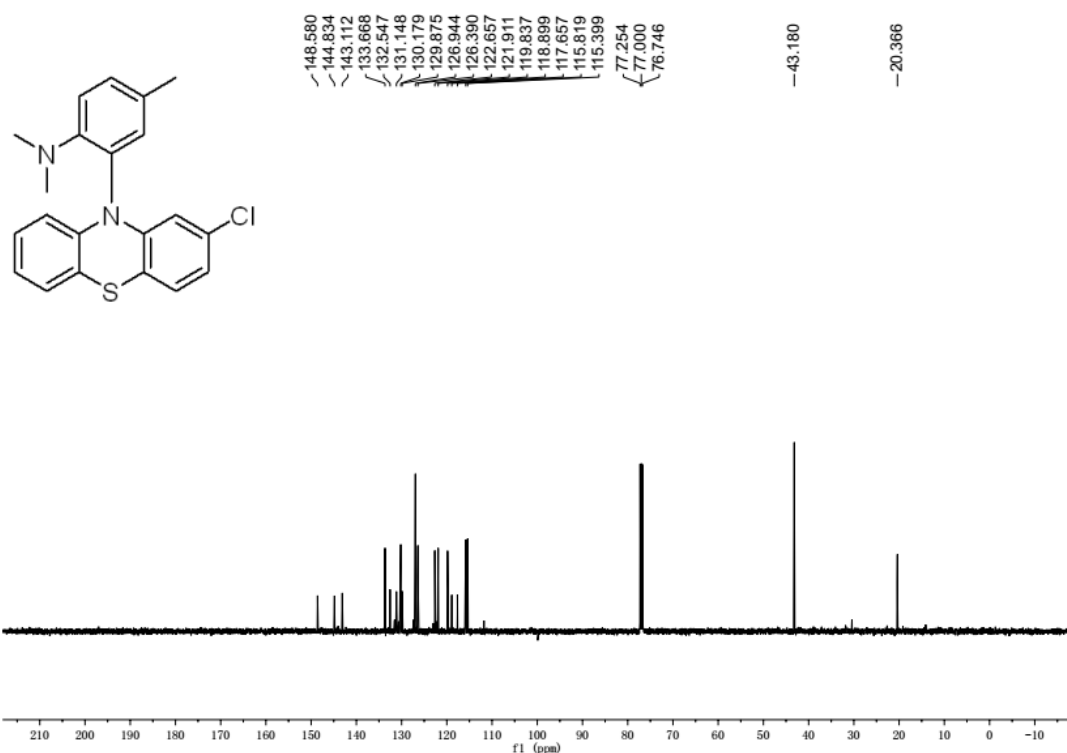

2-(2-Chloro-10H-phenothiazin-10-yl)-4-methoxy-N,N-dimethylaniline(3za):

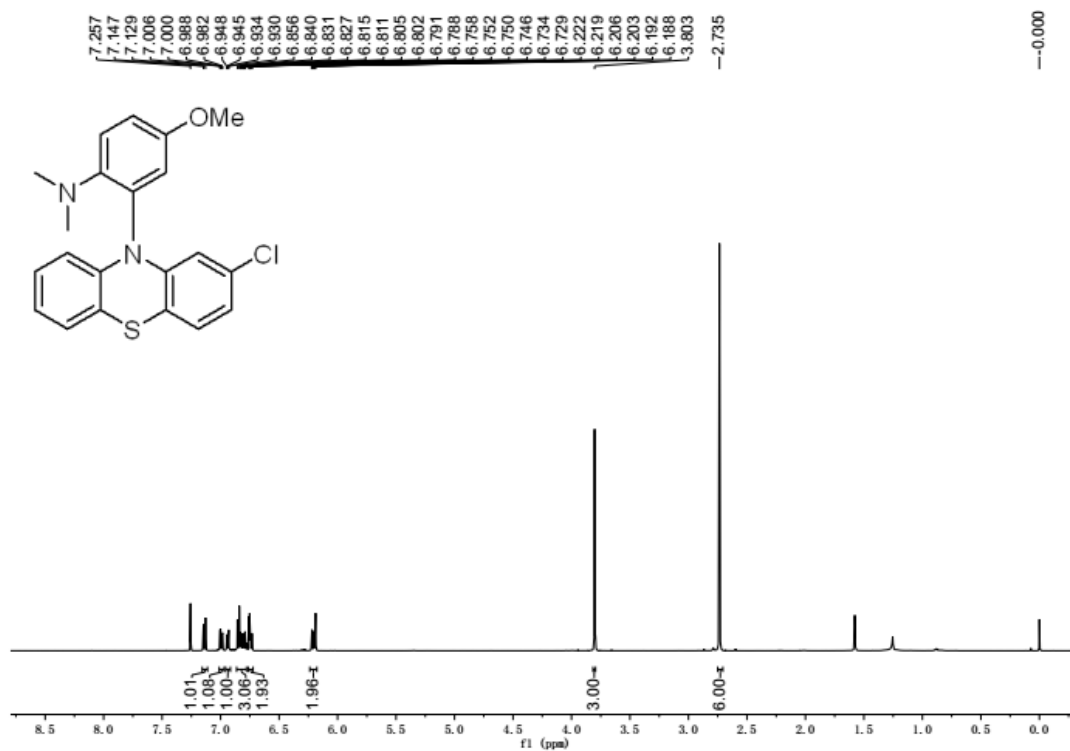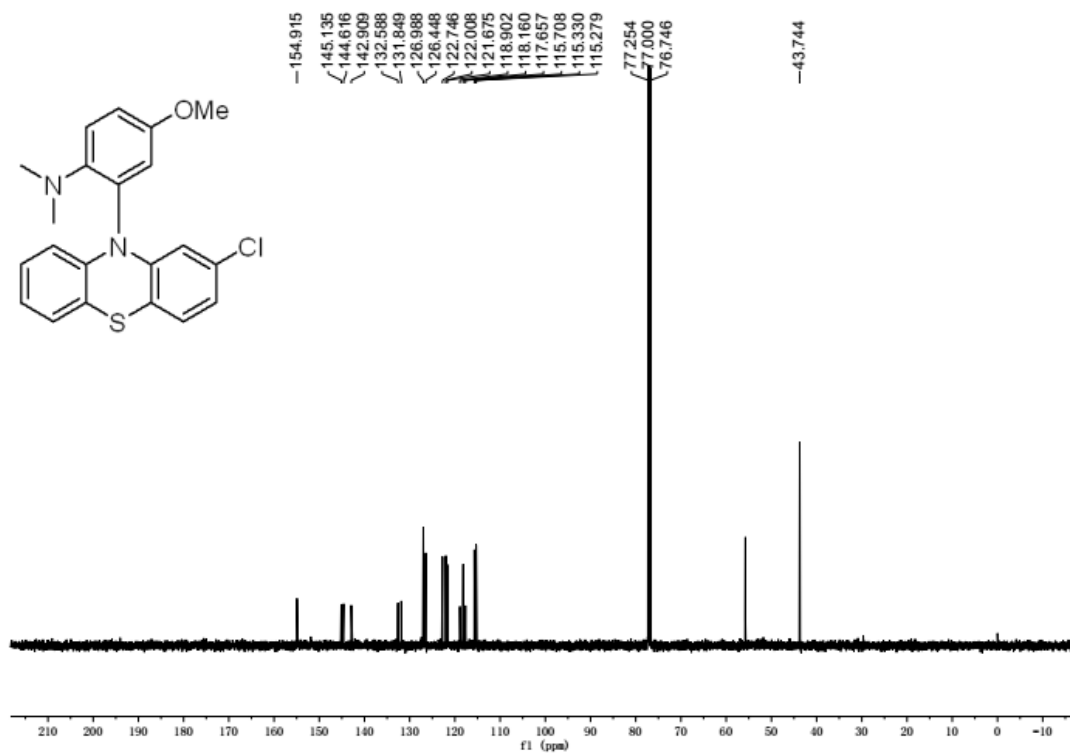



**4-Bromo-2-(2-chloro-10H-phenothiazin-10-yl)-N,N-dimethylaniline(3aaa):**

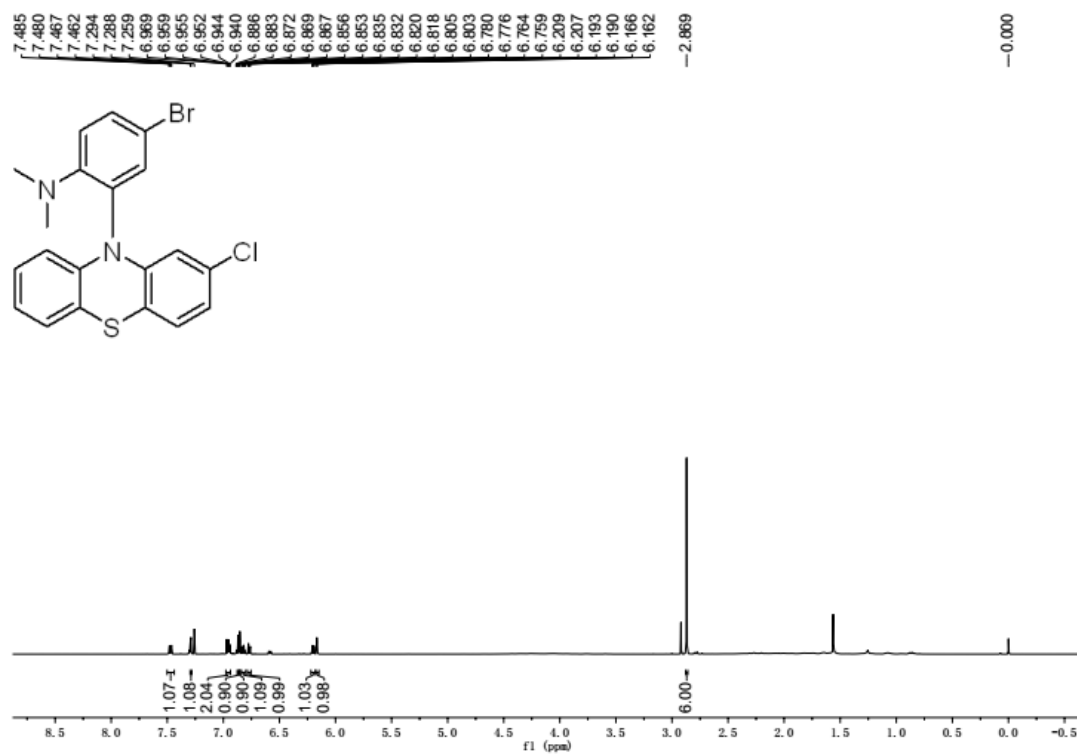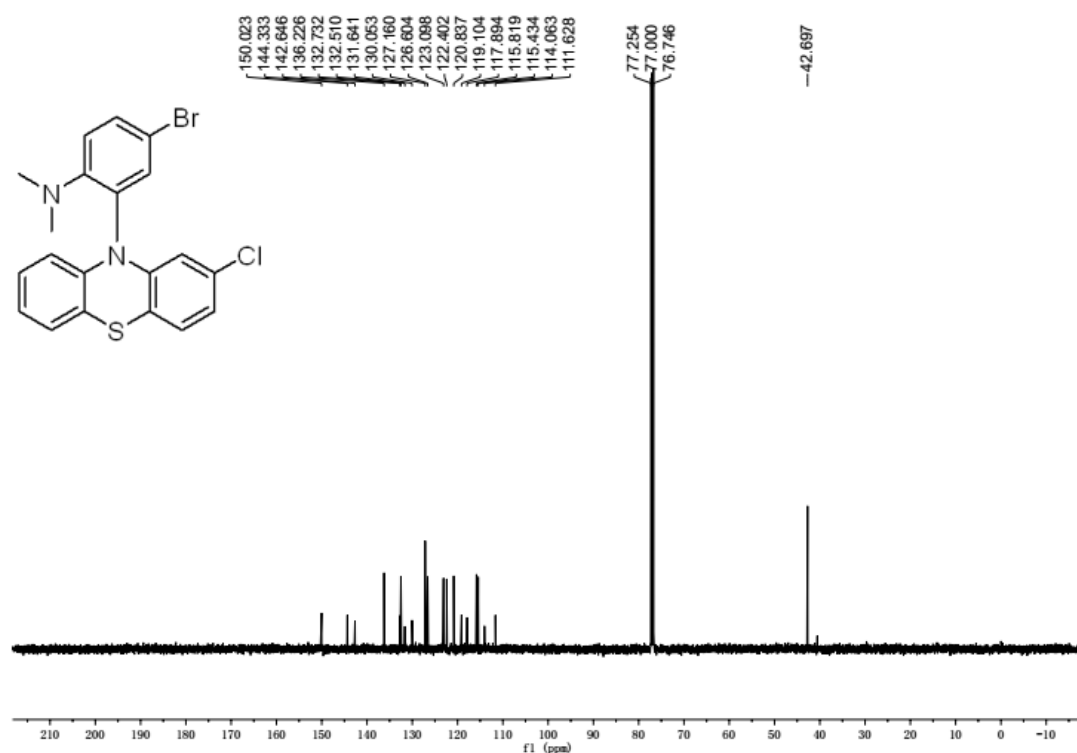

**10-(4-(Diethylamino)phenyl)-10*H*-phenothiazine-2-carbonitrile (3ab):**

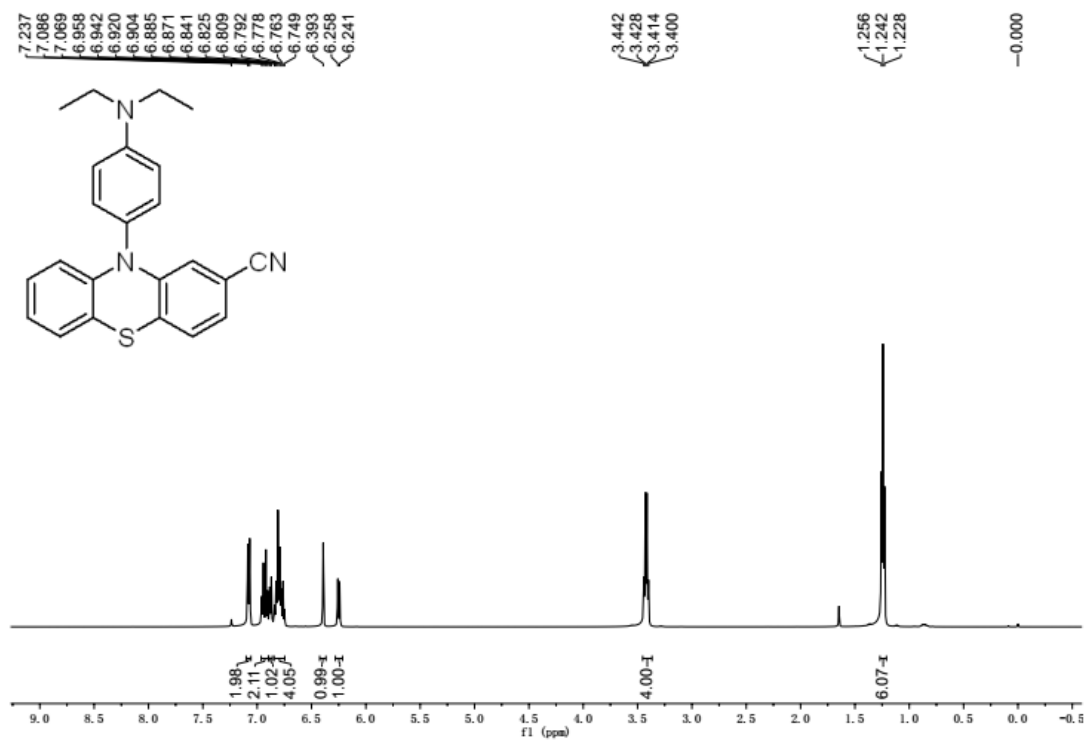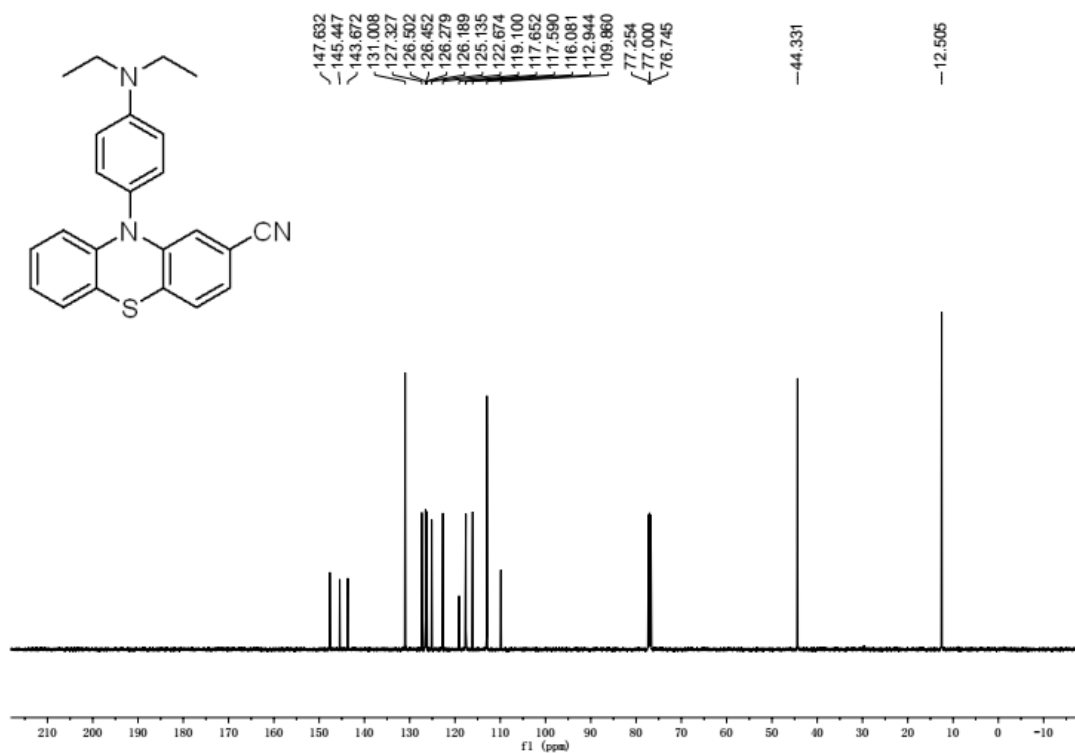

***N,N*-Diethyl-4-(2-(trifluoromethyl)-10*H*-phenothiazin-10-yl)aniline (3ac):**

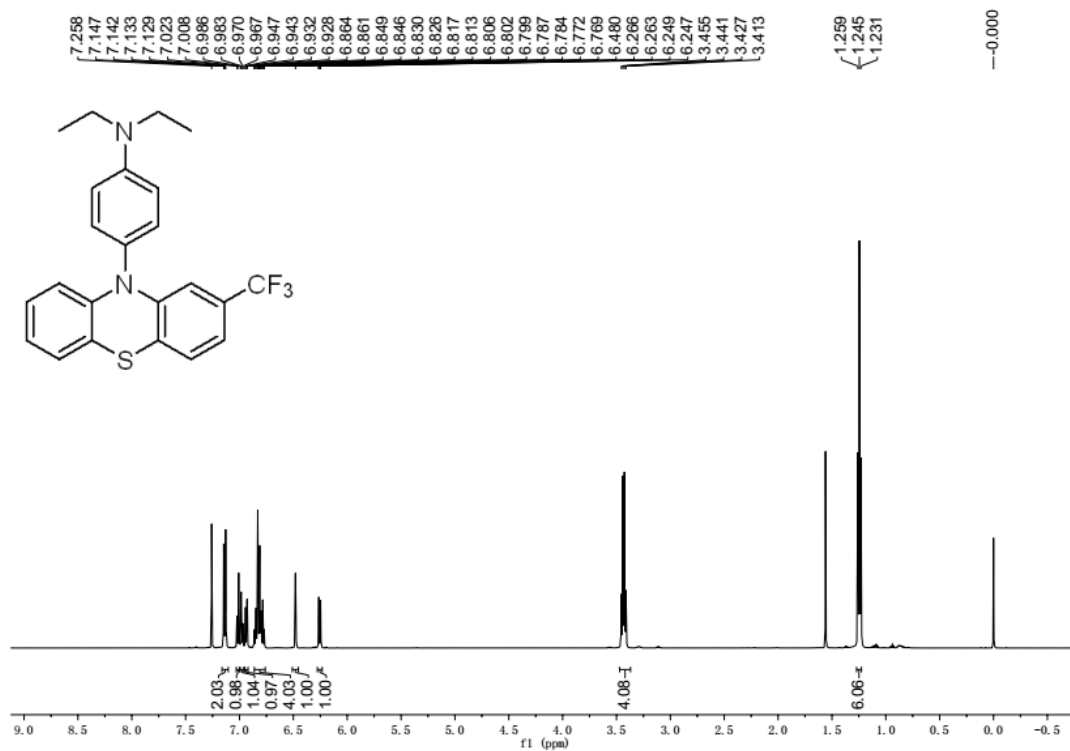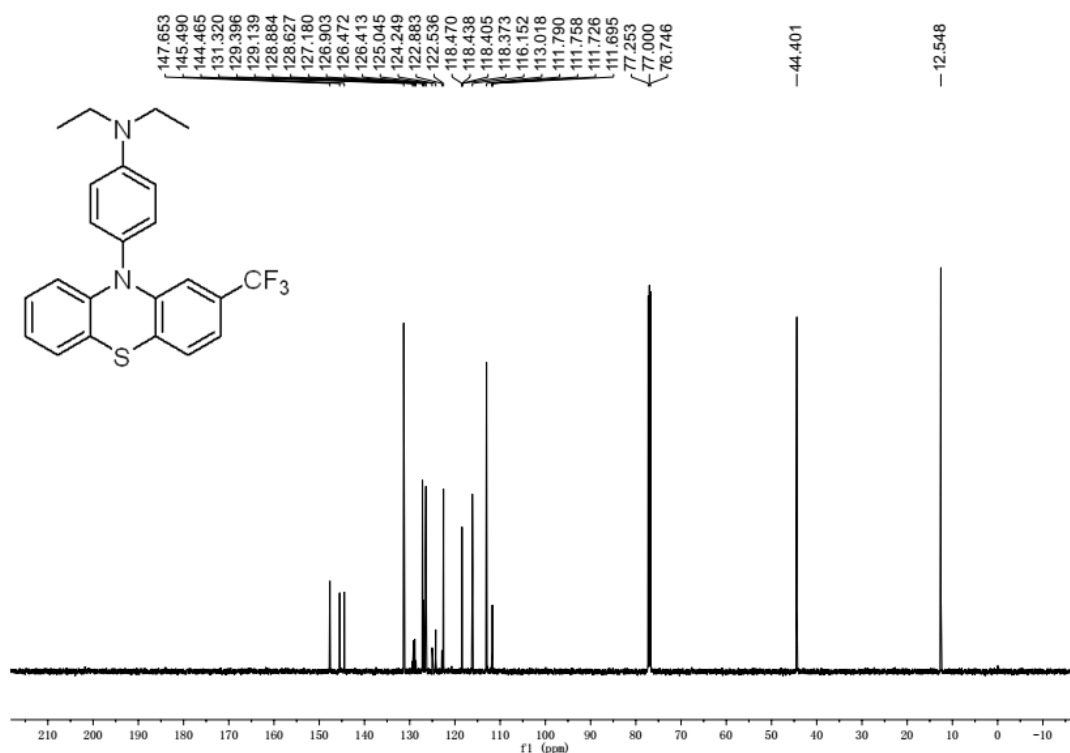

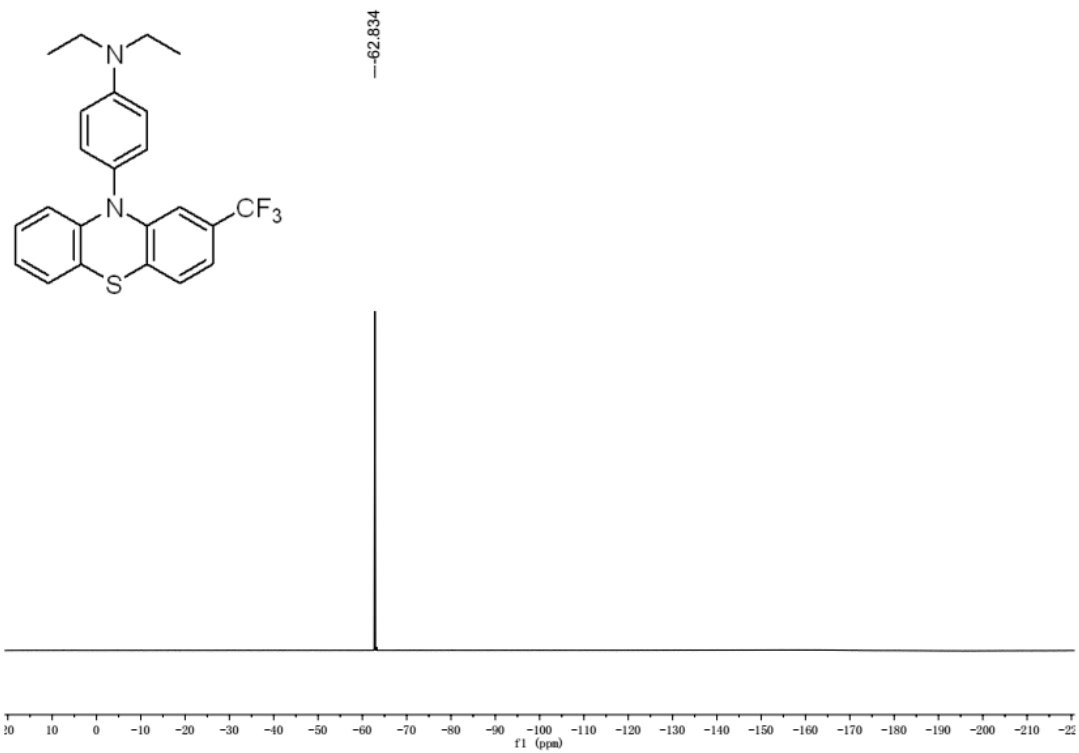

1-(10-(4-(Diethylamino)phenyl)-10H-phenothiazin-2-yl)ethan-1-one (3ad):

(3ad):

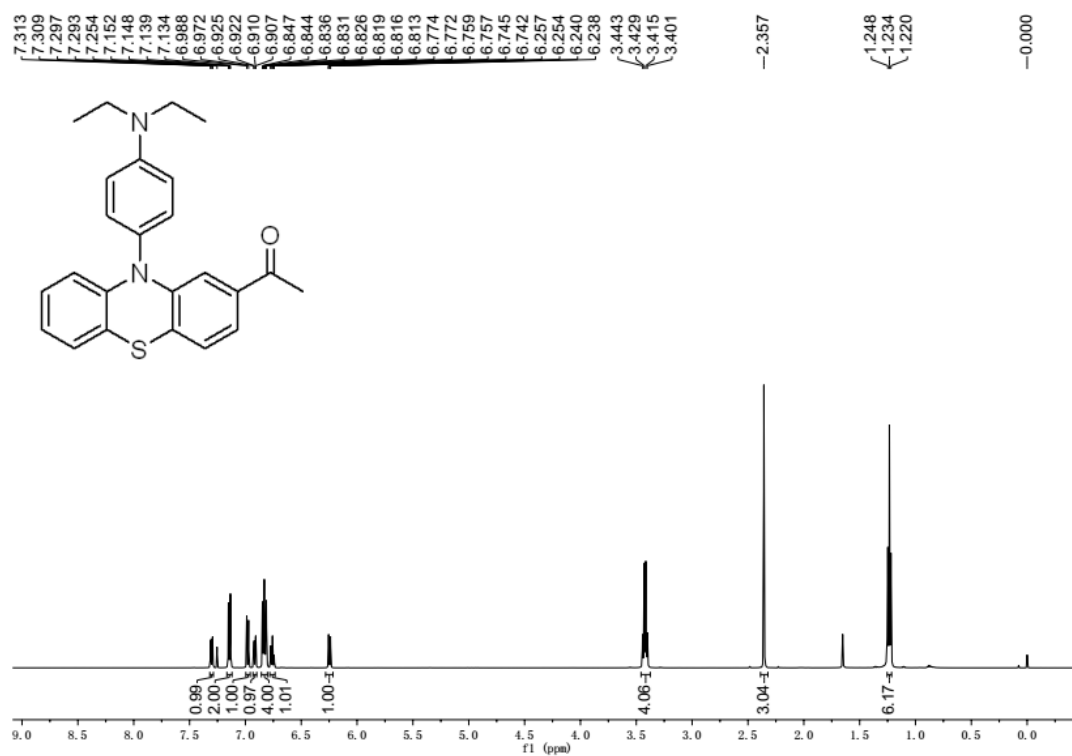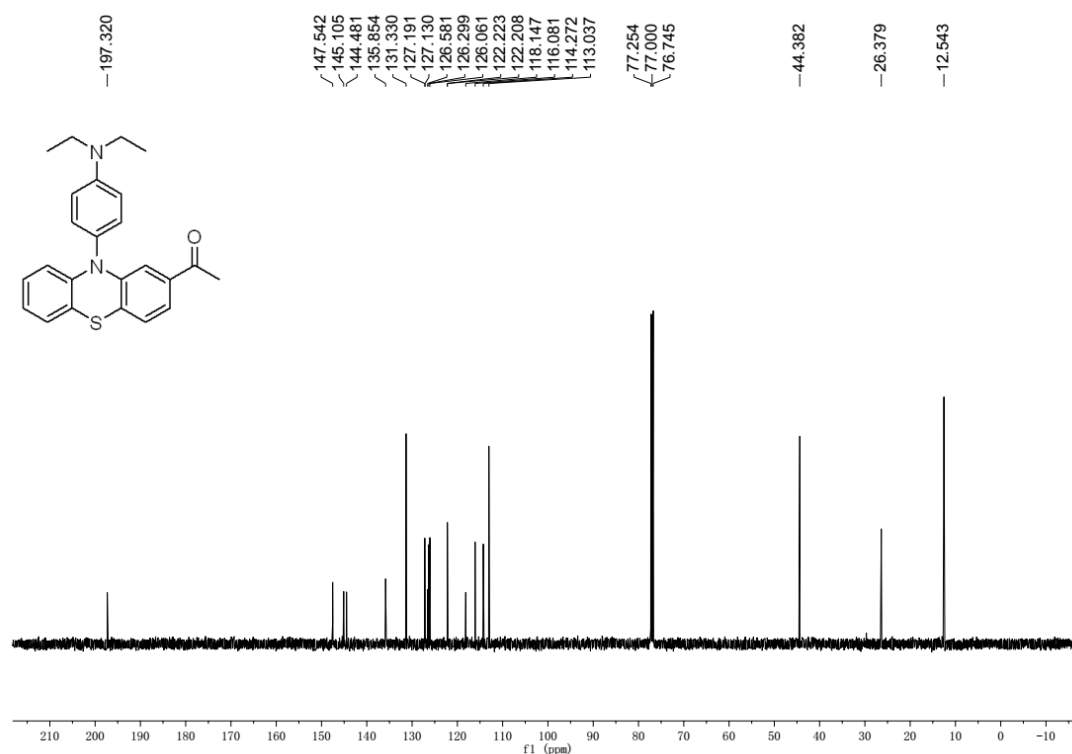

***N,N*-Diethyl-4-(2-(methylthio)-10*H*-phenothiazin-10-yl)aniline (3ae):**

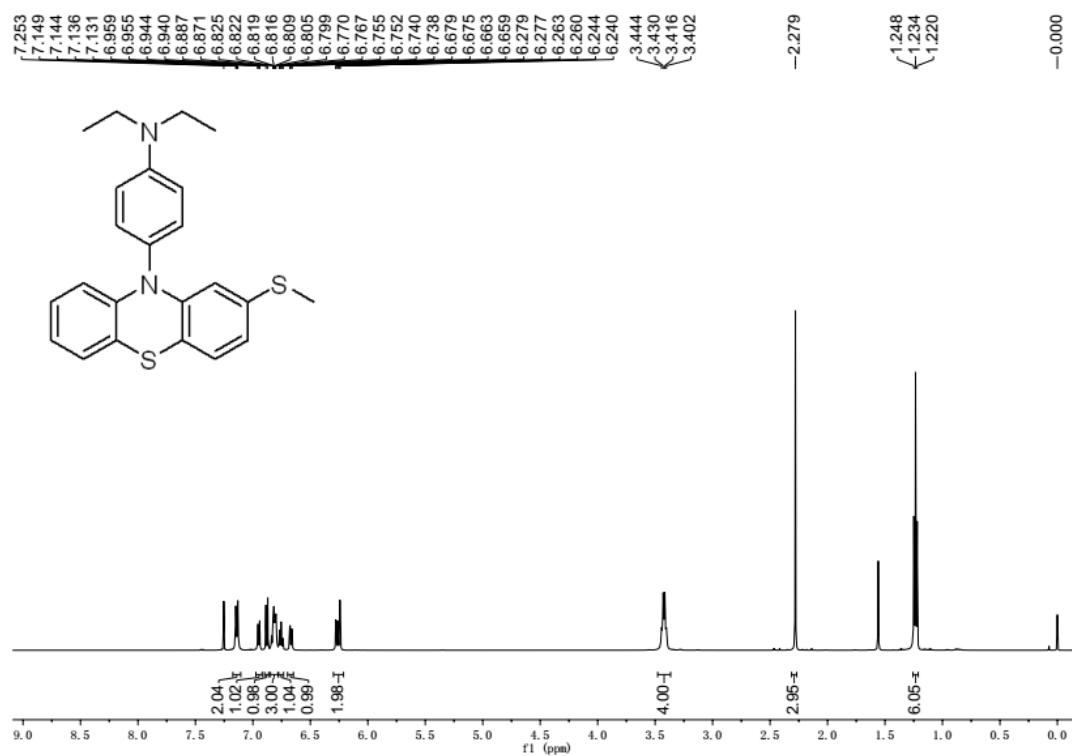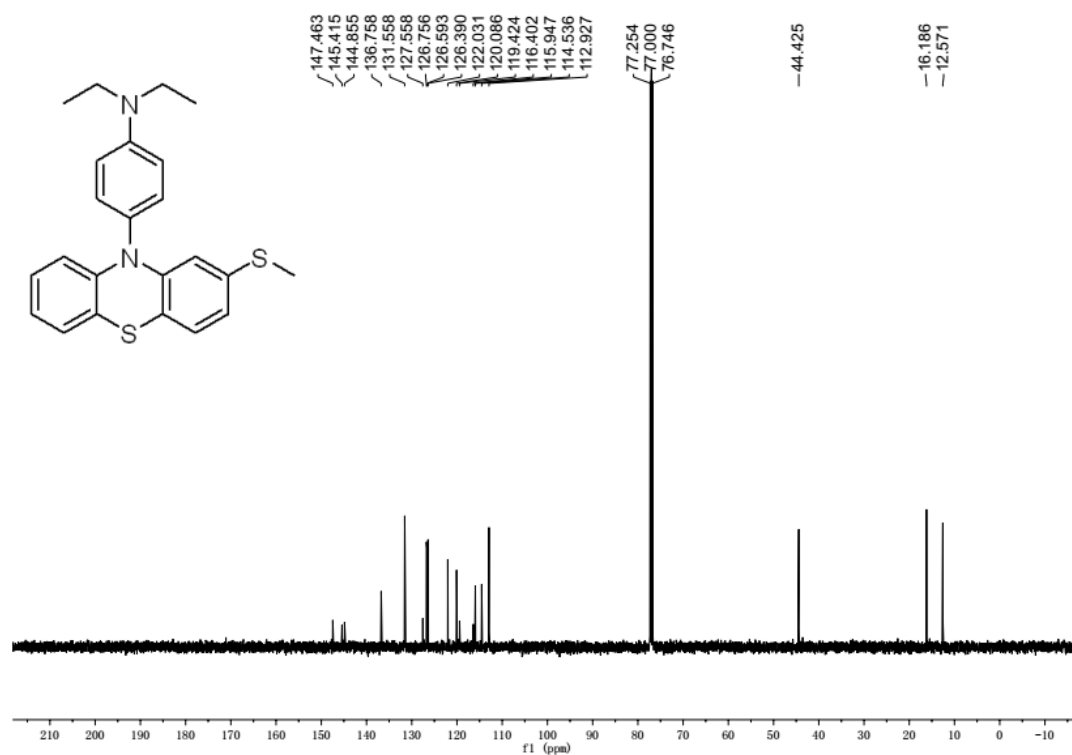

***N,N*-Diethyl-4-(2-methoxy-10*H*-phenothiazin-10-yl)aniline (3af):**

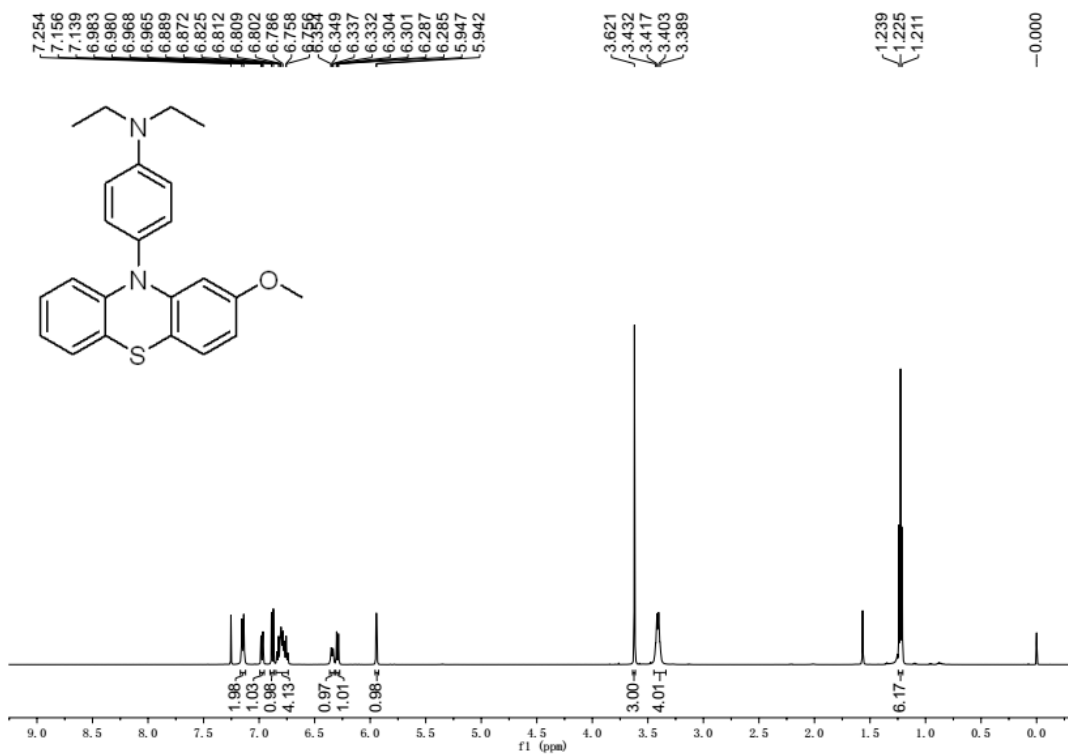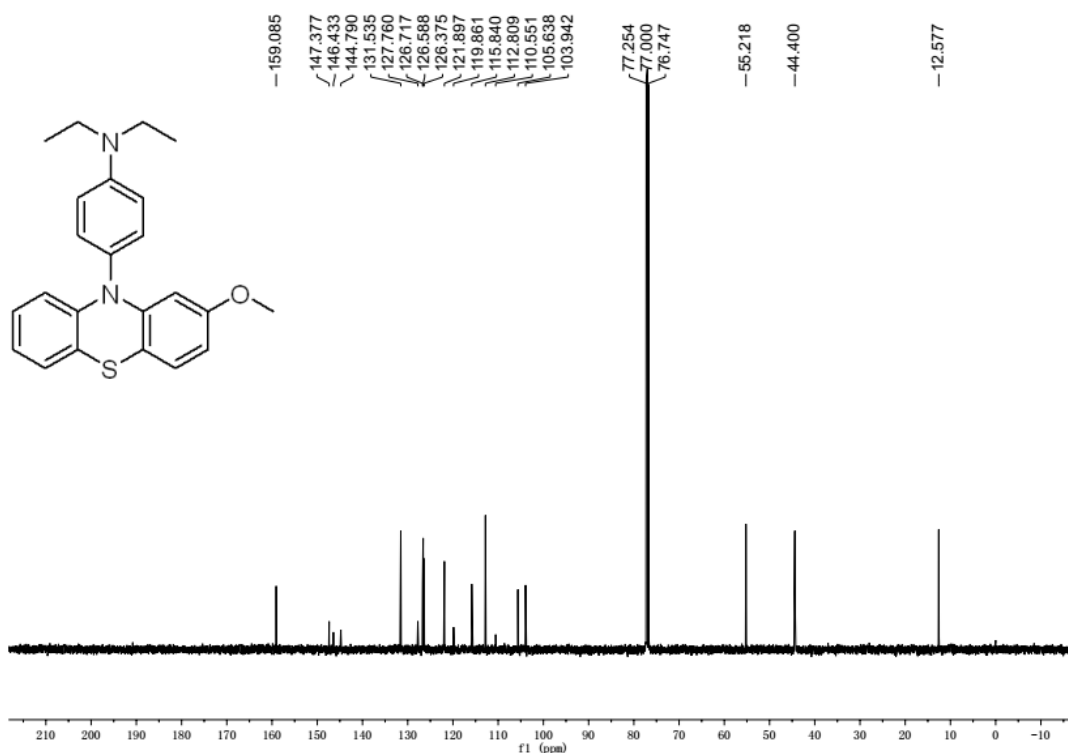

***N,N*-Diethyl-4-(2-(prop-1-en-2-yl)-10*H*-phenothiazin-10-yl)aniline (3ag):**

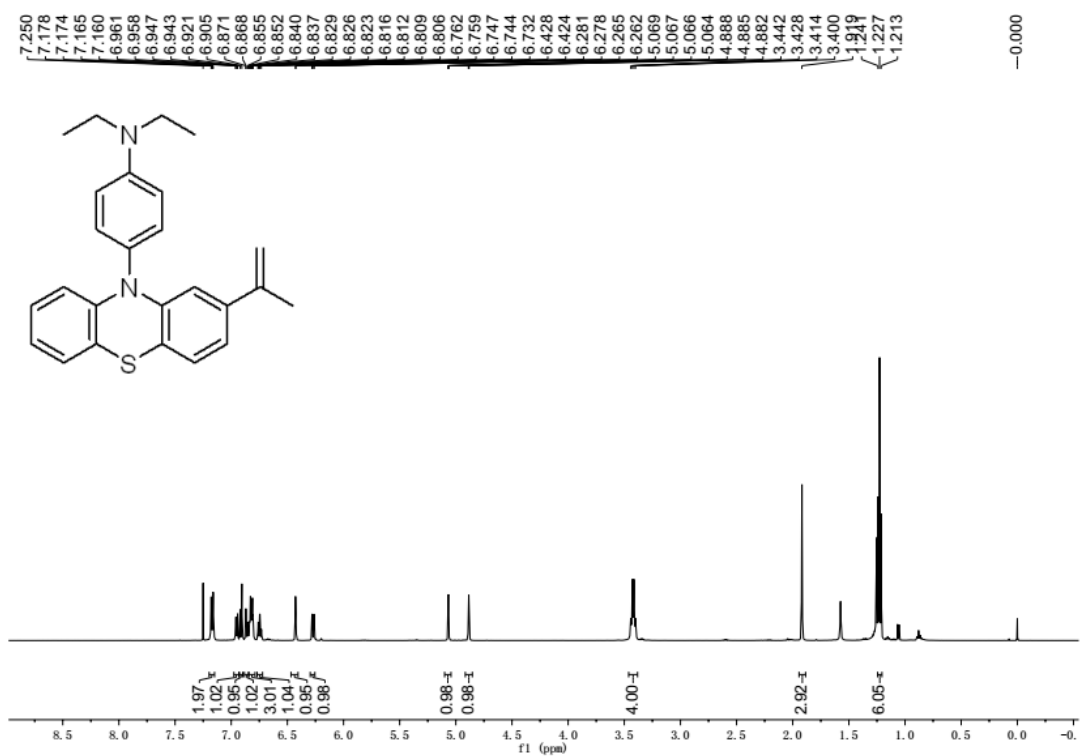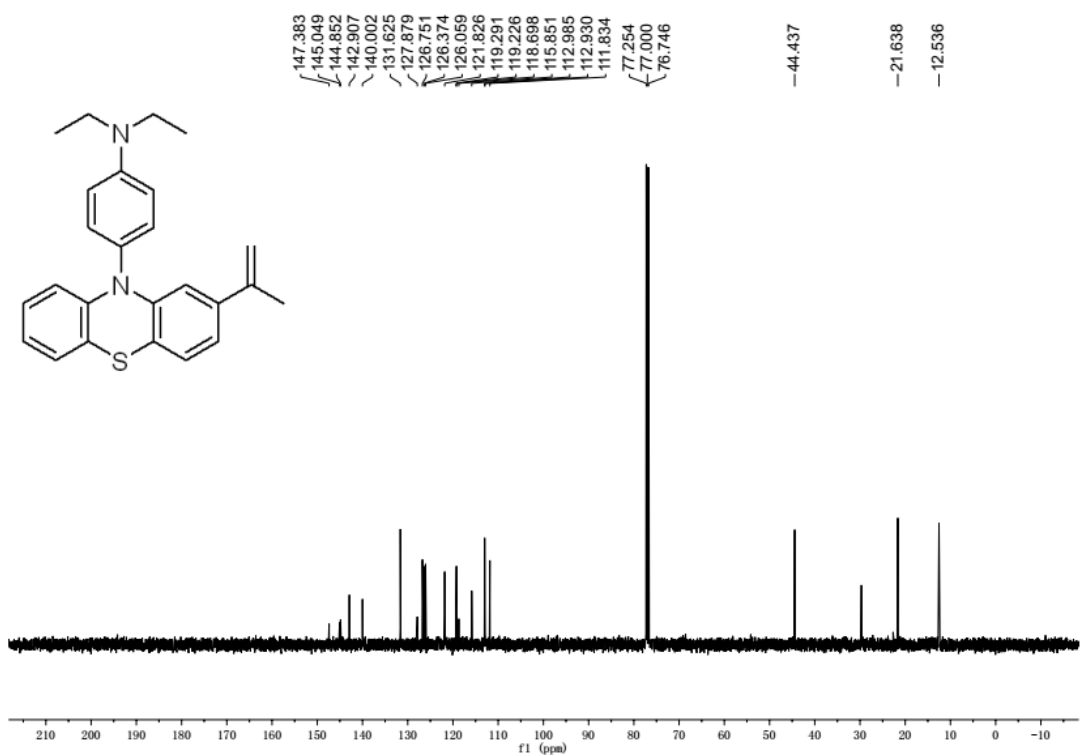



***N,N*-Diethyl-4-(4-nitro-10*H*-phenothiazin-10-yl)aniline (3ah):**

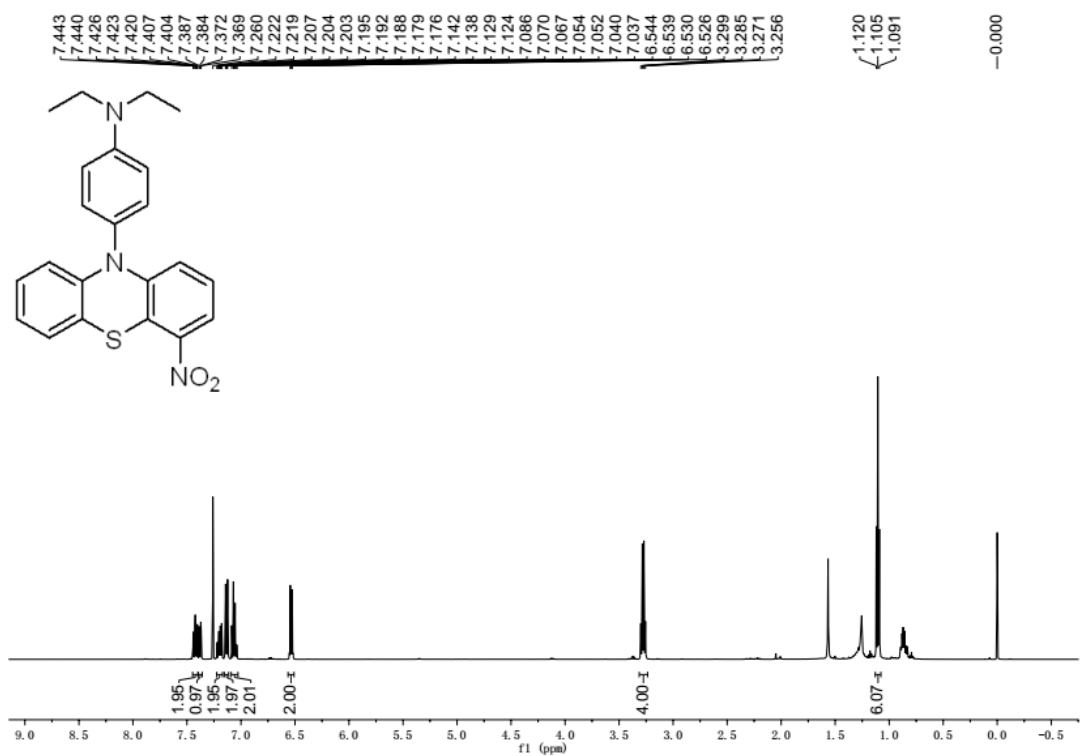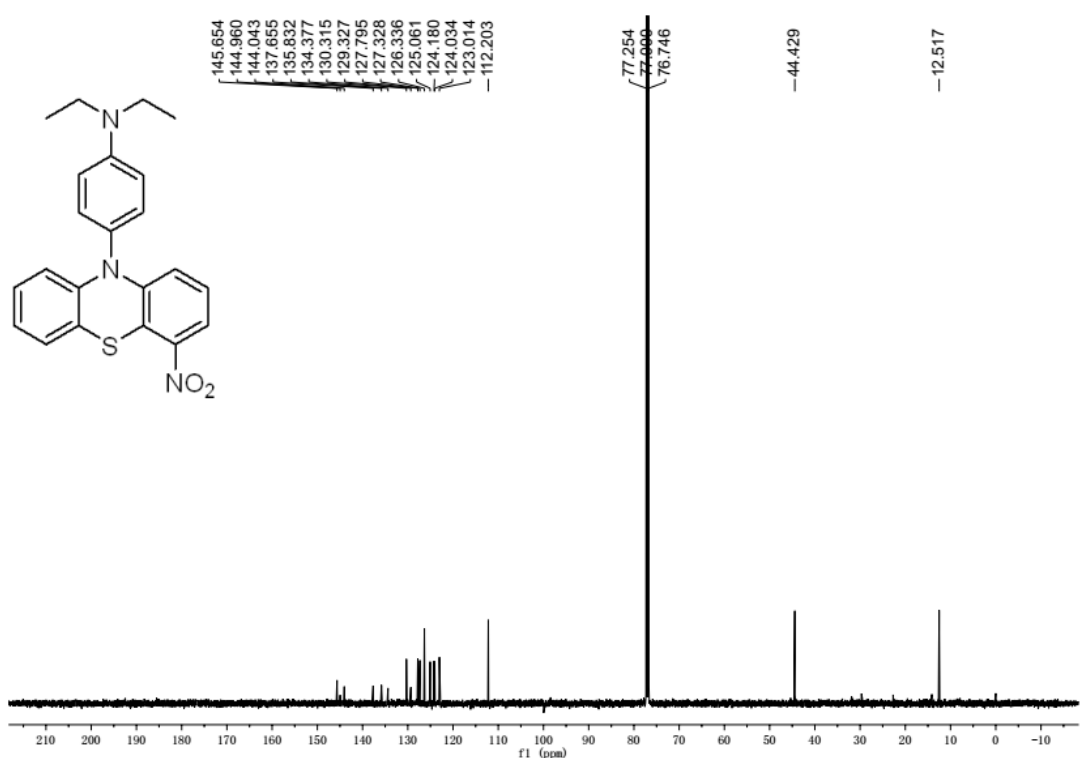

***N,N*-Diethyl-4-(10*H*-phenothiazin-10-yl)aniline (3ai):**

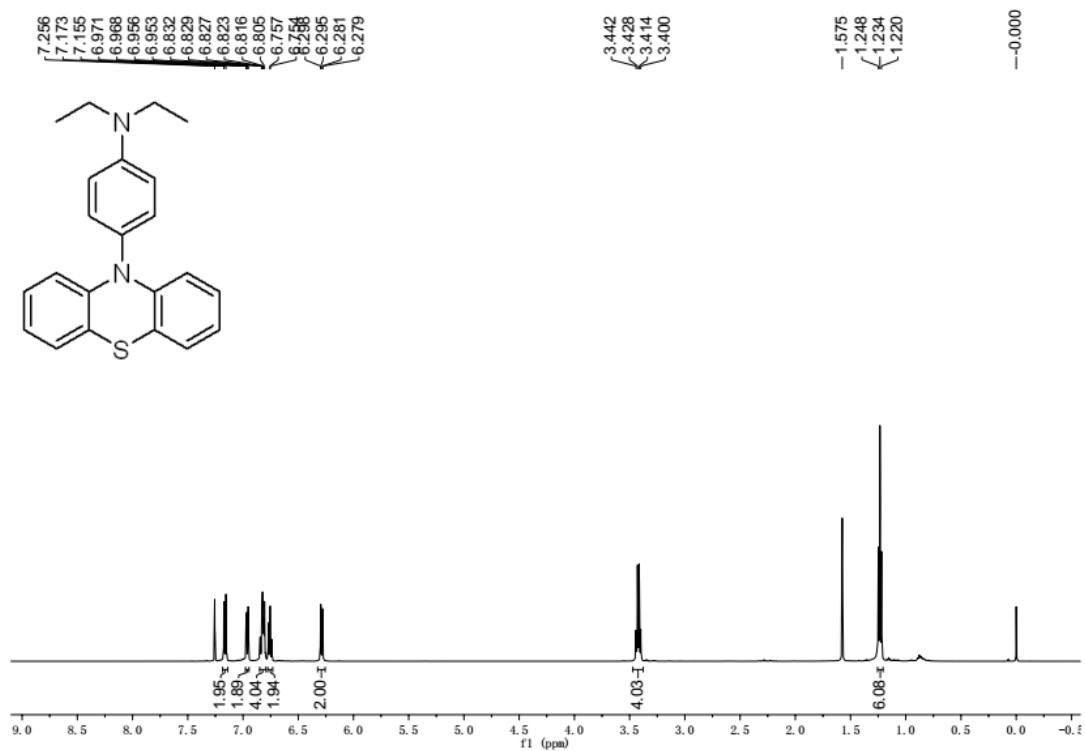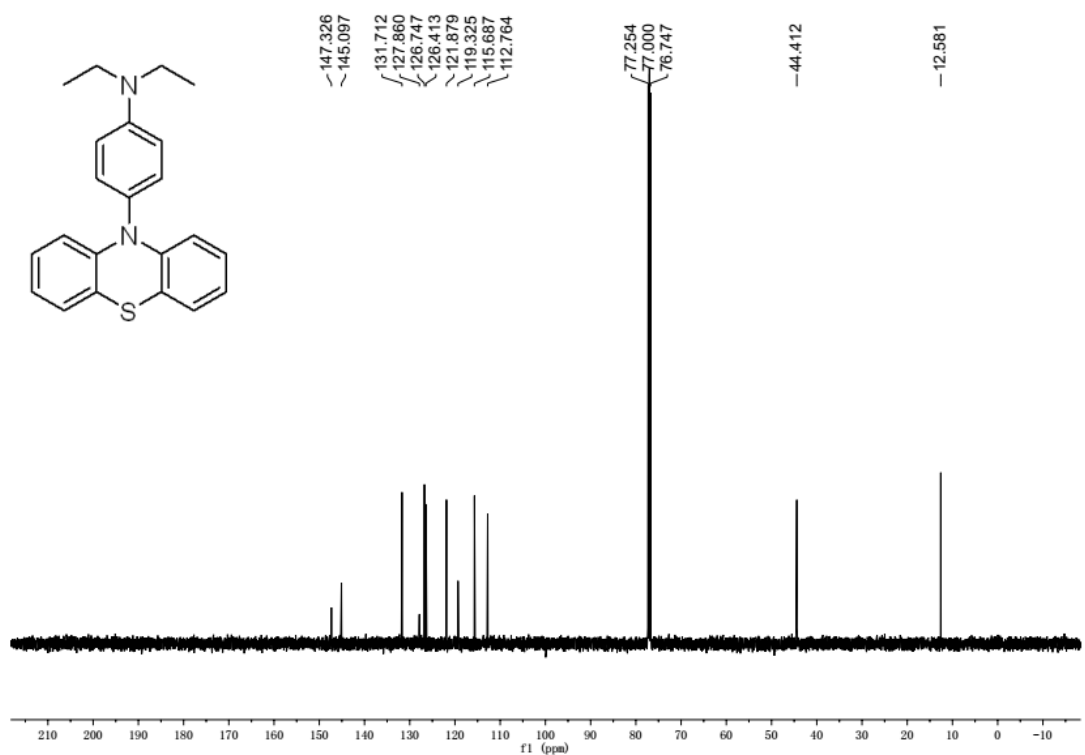

***N,N*-Diethyl-4-(10*H*-phenoxazin-10-yl)aniline 3aj):**

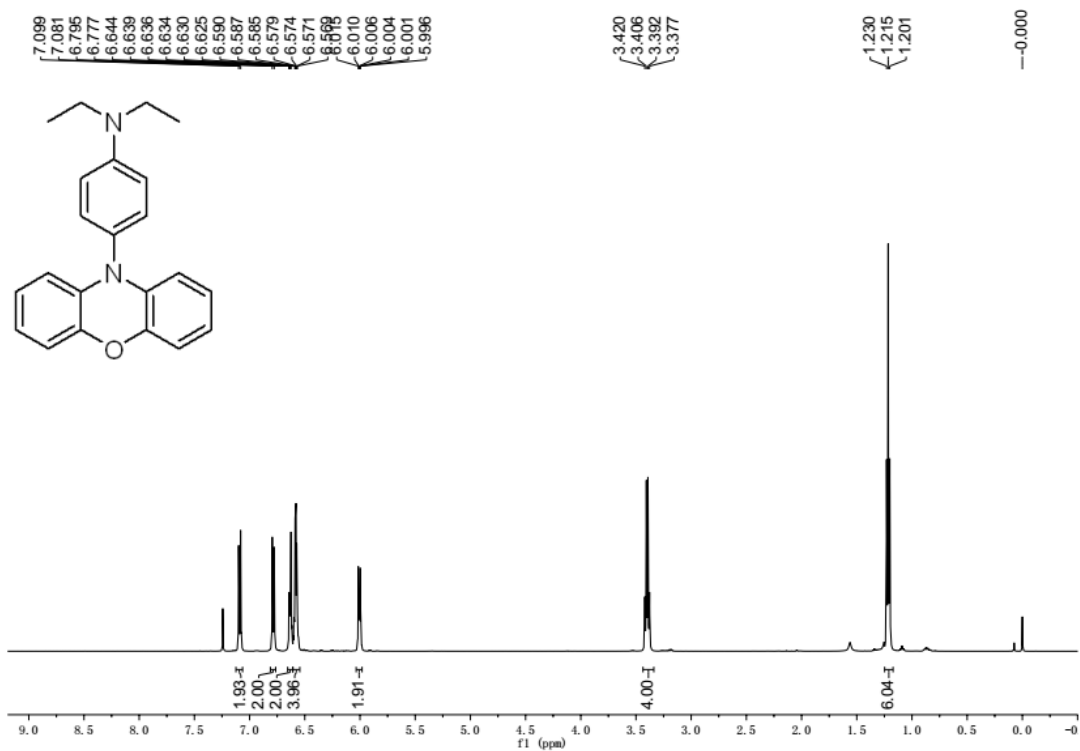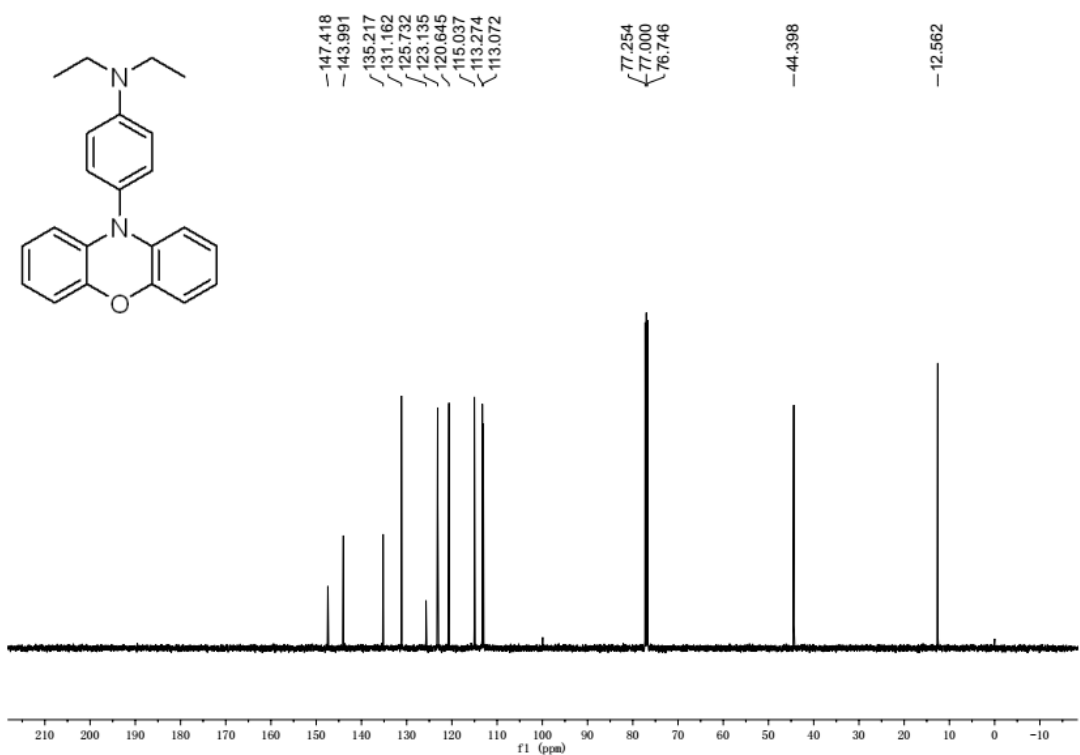

**(D) The X-ray single-crystal diffraction analysis of 3aa**

**(CCDC 1897389)**

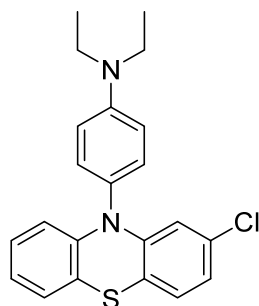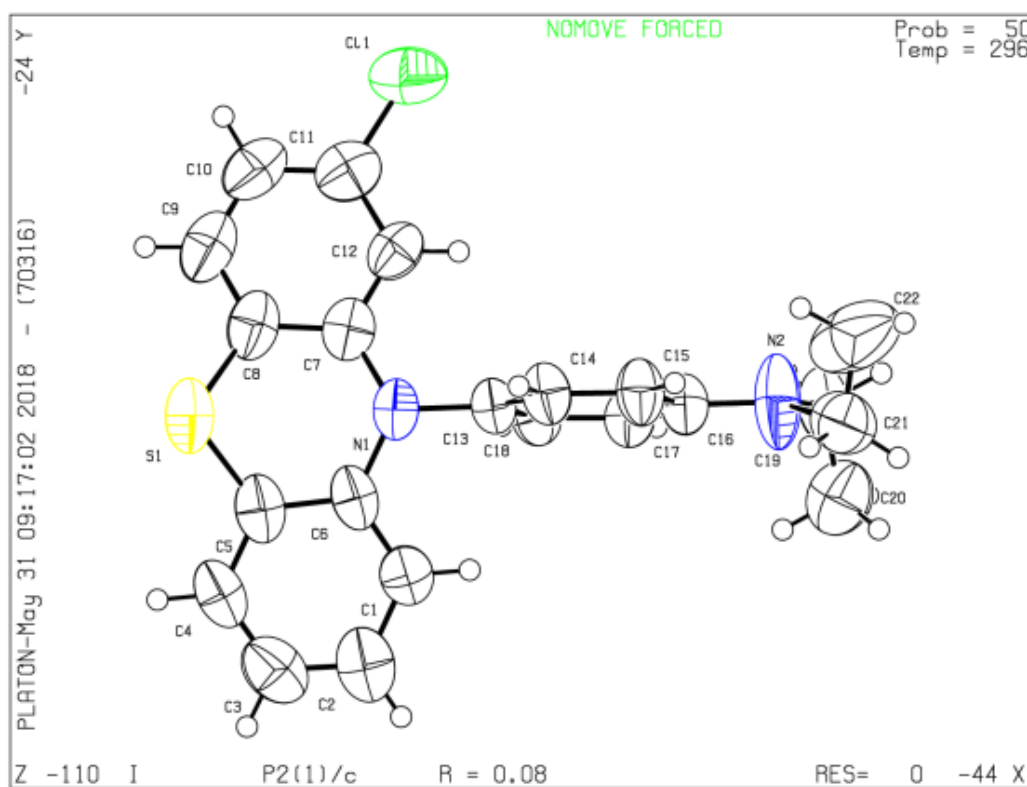

Supplement: c9cc01332f1.pdf [file c9cc01332f1.pdf]
